# Supplementary material for: Design and application of a fluorescent probe for imaging of endogenous Bruton's tyrosine kinase with preserved enzymatic activity
Source: RSC Chem Biol. 2025 Feb 20;6(4):618–29. doi: 10.1039/d4cb00313f (PMC11867108; doi:10.1039/d4cb00313f)
Supplement: CB-006-D4CB00313F-s001 [file CB-006-D4CB00313F-s001.xlsx]

## Sheet: PeptideGroups
Comment: Recombinant BTK treated with Evo-2. Below is a list of all peptides identified in the search. The search allowed covalent binding of the probe to any cysteines in the sequence.
Only three peptides were found containing the covalently bound adduct. Two of the peptides had the sequence QRPIFIITEYMANGCLLNYLR and showed modification at Cys481.
The third peptide was incorrectly annoted with few matched fragments. Low XCorrScore, many modifications, and high MW also suggest that it is an incorrect annotation.
Thus, manuel inspection of the fragment spectra confirmed that the probe was bound to Cys481 and no other cysteines.
Peptides with adduct
Sequence	Modifications	# PSMs	# Missed Cleavages	Theo. MH+ [Da]	m/z [Da] (by Search Engine): A2 Sequest HT	DeltaM [ppm] (by Search Engine): A2 Sequest HT	Deltam/z [Da] (by Search Engine): A2 Sequest HT	RT [min] (by Search Engine): A2 Sequest HT	XCorr (by Search Engine): A2 Sequest HT	comment
QRPIFIITEYMANGCLLNYLR	1x4930_adduct44122_H [C15]	4	0	2969.54	743.139	-2.94	-0.00218	57.6442	8.1	Peptide fragmented and identified four times. PSM, Peptide Spectra Matches
QRPIFIITEYMANGCLLNYLR	1xDeamidated [N13]; 1x4930_adduct44122_H [C15]	1	0	2970.53	990.851	3.57	0.00354	57.6503	6.21	Same peptide as above, but deamidated. Confirm the results.
YHPCFWIDGQYLCCSQTAKNAMGCQILENR	3xDeamidated [Q10; Q16; Q25]; 1x4930_adduct44122_H [C4]	1	1	3936.72	788.147	-4.06	-0.0032	44.4767	2.46	not corretly annotated spectra, low XCorrScore
All peptides matched
Sequence	Modifications	# PSMs	# Missed Cleavages	Theo. MH+ [Da]	m/z [Da] (by Search Engine): A2 Sequest HT	DeltaM [ppm] (by Search Engine): A2 Sequest HT	Deltam/z [Da] (by Search Engine): A2 Sequest HT	RT [min] (by Search Engine): A2 Sequest HT	XCorr (by Search Engine): A2 Sequest HT
ADERPTFK		16	0	963.489	482.248	-0.31	-0.00015	16.8441	3.15
DKNGQEGYIPSNYVTEAEDSIEMYEWYSK	1xDeamidated [N3]; 1xOxidation [M23]	2	1	3462.48	1154.83	-0.03	-3e-05	57.7381	8.24
DKNGQEGYIPSNYVTEAEDSIEMYEWYSK	1xDeamidated [N3]	1	1	3446.49	1149.5	0.05	6e-05	57.8183	7.58
DKNGQEGYIPSNYVTEAEDSIEMYEWYSK	1xOxidation [M23]	1	1	3461.5	1154.5	-0.56	-0.00064	57.7147	7.33
DKNGQEGYIPSNYVTEAEDSIEMYEWYSK		1	1	3445.51	862.133	1.2	0.00104	57.8117	3.75
DLAARNCLVNDQGVVK	1xCarbamidomethyl [C7]	2	1	1771.91	591.309	0.11	7e-05	28.7682	5.42
DLTFLKELGTGQFGVVK		5	1	1852.02	618.012	-0.57	-0.00035	56.8324	4.78
DVCEAMEYLESK	1xCarbamidomethyl [C3]	33	0	1473.62	491.879	0.14	7e-05	44.8089	4.37
DVCEAMEYLESK	1xCarbamidomethyl [C3]; 1xOxidation [M6]	32	0	1489.62	745.312	-1.77	-0.00132	41.3812	4.16
DVCEAMEYLESK		5	0	1416.6	708.805	0.83	0.00059	47.1631	3.75
EGSMSEDEFIEEAK		31	0	1600.67	800.838	0.81	0.00065	34.8488	5.24
EGSMSEDEFIEEAK	1xOxidation [M4]	41	0	1616.66	808.835	0.17	0.00014	31.3165	4.81
EGSMSEDEFIEEAKVMMNLSHEK		2	1	2670.17	668.298	-0.89	-0.0006	53.2786	6.56
ELGTGQFGVVK	1xDeamidated [Q6]	3	0	1135.6	568.303	-0.07	-4e-05	34.016	3.48
ELGTGQFGVVK		34	0	1134.62	567.812	0.69	0.00039	31.7851	3.34
ELGTGQFGVVKYGK		1	1	1482.8	494.937	1.11	0.00055	31.2113	4.17
FPVRWSPPEVLMYSK	1xOxidation [M12]	6	1	1851.95	617.988	2.01	0.00124	45.7397	4.28
FPYPFQVVYDEGPLYVFSPTEELR		9	0	2892.41	964.811	2.02	0.00195	58.0631	7.37
FPYPFQVVYDEGPLYVFSPTEELRK		6	1	3020.51	755.883	0.3	0.00022	57.8895	8.98
FQTQQLLEMCK	1xCarbamidomethyl [C10]	26	0	1425.69	713.349	2.8	0.002	39.7111	4.13
FQTQQLLEMCK	1xCarbamidomethyl [C10]; 1xOxidation [M9]	35	0	1441.68	721.347	3.25	0.00234	38.5161	4.05
FQTQQLLEMCK	1xCarbamidomethyl [C10]; 1xDeamidated [Q]	5	0	1426.67	713.839	0.66	0.00047	40.6116	3.97
FQTQQLLEMCK		12	0	1368.67	684.838	3.44	0.00235	46.9411	3.86
FQTQQLLEMCK	1xCarbamidomethyl [C10]; 3xDeamidated [Q2; Q4; Q5]	1	0	1428.64	714.821	-2.77	-0.00198	42.1151	1.93
FQTQQLLEMCKDVCEAMEYLESK	2xCarbamidomethyl [C10; C14]; 1xOxidation [M]	13	1	2896.29	966.101	0.84	0.00081	57.7127	9.46
FQTQQLLEMCKDVCEAMEYLESK	2xCarbamidomethyl [C10; C14]; 2xOxidation [M9; M17]	15	1	2912.28	971.433	1.05	0.00102	48.6513	8.06
FQTQQLLEMCKDVCEAMEYLESK	2xCarbamidomethyl [C10; C14]; 1xDeamidated [Q5]	1	1	2881.28	1441.15	5.31	0.00764	57.994	5.8
FQTQQLLEMCKDVCEAMEYLESK	1xOxidation [M9]	4	1	2782.24	696.317	0.72	0.0005	52.7051	5.17
FQTQQLLEMCKDVCEAMEYLESK	2xCarbamidomethyl [C10; C14]	2	1	2880.29	960.768	-1.09	-0.00105	57.9857	5.03
FQTQQLLEMCKDVCEAMEYLESK	1xCarbamidomethyl [C10]; 2xOxidation [M9; M17]	1	1	2855.26	952.424	-1.42	-0.00135	57.9082	3.86
FQTQQLLEMCKDVCEAMEYLESK	1xCarbamidomethyl [C14]; 1xDeamidated [Q5]; 1xOxidation [M9]	1	1	2840.25	947.423	2.02	0.00192	57.6659	3.55
FQTQQLLEMCKDVCEAMEYLESK	1xCarbamidomethyl [C14]	1	1	2823.27	941.761	-0.78	-0.00073	58.1758	2.67
FSSKSDIWAFGVLMWEIYSLGK		1	1	2564.29	855.434	-0.88	-0.00075	58.235	4.5
FTNSETAEHIAQGLR		60	0	1673.82	558.613	0.56	0.00031	29.653	6.25
FTNSETAEHIAQGLR	1xDeamidated [N/Q]	36	0	1674.81	558.942	1.65	0.00092	32.4936	6.01
GDEYFILEESNLPWWR		5	0	2053.97	685.326	-0.44	-0.0003	57.9251	5.83
GEESSEMEQISIIER		10	0	1736.8	868.904	0.48	0.00042	39.1399	4.78
GEESSEMEQISIIER	1xOxidation [M7]	2	0	1752.8	876.902	0.32	0.00028	32.8065	4.76
GQYDVAIK		29	0	893.473	447.24	0.06	3e-05	23.5137	2.72
GQYDVAIK	1xDeamidated [Q2]	2	0	894.457	447.732	0.53	0.00024	24.8472	2.5
GQYDVAIKMIK		1	1	1265.69	633.35	0.07	4e-05	42.3938	2.09
GSIDVEKITCVETVVPEK	1xCarbamidomethyl [C10]	1	1	2003.04	668.35	-0.12	-8e-05	39.4897	5.3
HLFSTIPELINYHQHNSAGLISR		63	0	2647.37	883.128	-1.29	-0.00114	43.5011	9.4
HLFSTIPELINYHQHNSAGLISR	1xDeamidated [N/Q]	42	0	2648.36	662.846	2.06	0.00137	45.7166	8.76
HLFSTIPELINYHQHNSAGLISR	2xDeamidated [Q14; N16]	1	0	2649.34	530.678	6.98	0.0037	45.3847	2.49
HMTRSQAEQLLK		1	1	1441.76	481.258	2	0.00096	16.1162	3.03
HRFQTQQLLEMCK	1xCarbamidomethyl [C12]	1	1	1718.85	573.621	1.19	0.00068	29.098	6.97
HYVVCSTPQSQYYLAEK	1xCarbamidomethyl [C5]	35	0	2072.97	1036.99	-0.8	-0.00083	29.813	7.79
HYVVCSTPQSQYYLAEK	1xCarbamidomethyl [C5]; 1xDeamidated [Q]	5	0	2073.96	691.993	2.52	0.00174	30.8719	7.21
HYVVCSTPQSQYYLAEK		6	0	2015.95	672.657	1.43	0.00096	31.5784	6.78
ILLSNILDVMDEES	1xOxidation [M10]	10	0	1606.79	803.902	5.53	0.00445	57.8735	4.31
ILLSNILDVMDEES		17	0	1590.79	795.9	-0.29	-0.00023	58.1349	4.13
ILLSNILDVMDEES	1xDeamidated [N5]	2	0	1591.78	796.393	1.39	0.00111	58.1835	3.49
ITCVETVVPEK	1xCarbamidomethyl [C3]	48	0	1274.67	637.837	0.29	0.00018	28.1924	3.76
ITCVETVVPEK		2	0	1217.64	609.327	1.69	0.00103	30.7429	2.73
ITCVETVVPEKNPPPER	1xCarbamidomethyl [C3]	57	1	1965.01	655.675	0.17	0.00011	26.2883	6.61
ITCVETVVPEKNPPPER	1xCarbamidomethyl [C3]; 1xDeamidated [N12]	1	1	1965.99	656.003	-0.76	-0.0005	27.43	5.32
KGSIDVEK		6	1	875.483	438.245	0.34	0.00015	14.5211	3.38
KPLPPEPAAAPVSTSELK		46	0	1832.02	611.344	0.37	0.00022	28.6679	7.71
KPLPPEPAAAPVSTSELKK		105	1	1960.11	654.042	0.6	0.00039	24.0541	8.7
KPLPPTPEEDQILK		64	0	1604.89	535.635	1.13	0.0006	30.6311	6.6
KPLPPTPEEDQILK	1xDeamidated [Q11]	1	0	1605.87	803.441	0.79	0.00063	32.0506	1.91
KPLPPTPEEDQILKKPLPPEPAAAPVSTSELK		14	1	3417.89	855.227	-0.75	-0.00064	36.7251	10.87
KPLPPTPEEDQILKKPLPPEPAAAPVSTSELK	1xDeamidated [Q11]	2	1	3418.87	855.477	3.64	0.00311	36.7612	9.86
KTSPLNFK	1xDeamidated [N6]	6	1	935.52	468.264	0.37	0.00017	21.4905	4.26
KTSPLNFK		13	1	934.536	467.772	0.12	6e-05	21.4905	3.82
LFLLTVHK		14	0	970.608	485.809	1.54	0.00075	37.7936	2.76
LFLLTVHKLSYYEYDFER		6	1	2336.2	779.404	0.7	0.00055	50.3689	5.39
LKYPVSQQNK	1xDeamidated [N/Q]	17	1	1205.65	402.556	0.06	2e-05	19.0662	4.11
LKYPVSQQNK		34	1	1204.67	402.229	2.27	0.00091	18.5252	3.89
LSYYEYDFER		41	0	1384.61	692.804	-3.3	-0.00229	41.2793	3.67
LVQLYGVCTK		23	0	1123.62	562.312	-1.11	-0.00062	36.6785	3.31
LVQLYGVCTK	1xCarbamidomethyl [C8]	27	0	1180.64	590.823	-0.52	-0.00031	34.2738	3.26
LVQLYGVCTK	1xCarbamidomethyl [C8]; 1xDeamidated [Q3]	4	0	1181.62	591.316	1.13	0.00067	35.059	2.8
LYRPHLASEK		32	0	1213.67	405.227	-0.82	-0.00033	18.5487	5.13
MIKEGSMSEDEFIEEAK		5	1	1972.89	658.301	0.54	0.00036	33.3853	6.34
MIKEGSMSEDEFIEEAK	1xOxidation [M1]	1	1	1988.88	663.634	2.88	0.00191	29.3179	4.93
NAMGCQILENR	1xCarbamidomethyl [C5]	40	0	1305.6	653.306	0.37	0.00024	30.328	4.23
NAMGCQILENR	1xCarbamidomethyl [C5]; 1xDeamidated [N/Q]; 1xOxidation [M3]	9	0	1322.58	661.796	1.53	0.00101	26.7062	4.22
NAMGCQILENR	1xCarbamidomethyl [C5]; 1xDeamidated [N/Q]	29	0	1306.59	653.798	0.08	5e-05	30.6395	4.19
NAMGCQILENR	1xCarbamidomethyl [C5]; 1xOxidation [M3]	66	0	1321.6	661.303	0.24	0.00016	24.2078	4.09
NAMGCQILENR		5	0	1248.58	624.795	0.56	0.00035	32.5103	3.89
NAMGCQILENR	1xDeamidated [N1]	1	0	1249.57	625.287	-0.22	-0.00014	37.2406	3.51
NAMGCQILENR	1xCarbamidomethyl [C5]; 2xDeamidated [N1; N10]; 1xOxidation [M3]	1	0	1323.57	662.287	0.04	3e-05	27.3424	3.08
NAMGCQILENRNGSLKPGSSHR	1xCarbamidomethyl [C5]; 2xDeamidated [N/Q]	22	1	2428.15	607.794	3.04	0.00184	24.7361	6.4
NAMGCQILENRNGSLKPGSSHR	1xCarbamidomethyl [C5]; 1xDeamidated [N/Q]	26	1	2427.16	607.546	0.58	0.00035	23.4	6.24
NAMGCQILENRNGSLKPGSSHR	1xCarbamidomethyl [C5]; 1xDeamidated [N12]; 1xOxidation [M3]	15	1	2443.16	611.545	0.06	3e-05	20.4643	5.86
NAMGCQILENRNGSLKPGSSHR	1xDeamidated [N10]	2	1	2370.14	474.835	1.64	0.00078	23.6065	2.16
NAMGCQILENRNGSLKPGSSHR	1xCarbamidomethyl [C5]; 2xDeamidated [N1; N10]; 1xOxidation [M3]	1	1	2444.14	489.635	1.35	0.00066	21.3357	1.85
NAPSTAGLGYGSWEIDPK		40	0	1862.89	621.634	-1.66	-0.00103	42.4494	6.68
NAPSTAGLGYGSWEIDPK	1xDeamidated [N1]	13	0	1863.88	621.964	0.2	0.00013	46.4138	6
NAPSTAGLGYGSWEIDPKDLTFLK		3	1	2580.3	860.773	2.64	0.00227	56.6969	6.13
NCLVNDQGVVK	1xCarbamidomethyl [C2]; 1xDeamidated [N/Q]	30	0	1246.61	623.807	-1.92	-0.00119	27.4003	4
NCLVNDQGVVK	1xCarbamidomethyl [C2]; 2xDeamidated [N1; N5]	4	0	1247.59	624.3	-0.06	-4e-05	29.3542	3.82
NCLVNDQGVVK	1xCarbamidomethyl [C2]	25	0	1245.63	623.317	0.64	0.0004	24.6703	3.68
NCLVNDQGVVK	1xDeamidated [N1]	1	0	1189.59	595.298	1.05	0.00063	30.3418	3.37
NCLVNDQGVVK		2	0	1188.6	594.806	-0.27	-0.00016	26.2119	3.23
NCLVNDQGVVKVSDFGLSR	1xCarbamidomethyl [C2]	1	1	2107.06	703.026	2.13	0.0015	41.0562	5.87
NGQEGYIPSNYVTEAEDSIEMYEWYSK	1xDeamidated [N1]; 1xOxidation [M21]	1	0	3219.36	1073.79	-1.41	-0.00151	57.93	8.32
QEGKEGGFIVR		2	1	1219.64	407.219	0.16	7e-05	22.0292	3.41
QRPIFIITEYMANGCLLNYLR	1xCarbamidomethyl [C15]; 1xDeamidated [N13]; 1xOxidation [M11]	3	0	2602.32	868.111	0.83	0.00072	57.6863	9.15
QRPIFIITEYMANGCLLNYLR	1xCarbamidomethyl [C15]; 2xDeamidated [N13; N18]	1	0	2587.3	863.108	1.51	0.0013	57.8117	8.58
QRPIFIITEYMANGCLLNYLR	1x4930_adduct44122_H [C15]	4	0	2969.54	743.139	-2.94	-0.00218	57.6442	8.1
QRPIFIITEYMANGCLLNYLR	1xCarbamidomethyl [C15]; 1xDeamidated [N13]	2	0	2586.32	862.778	-0.05	-4e-05	57.8907	7.98
QRPIFIITEYMANGCLLNYLR	1xCarbamidomethyl [C15]	1	0	2585.34	862.45	-0.11	-0.0001	57.9224	7.66
QRPIFIITEYMANGCLLNYLR	1xCarbamidomethyl [C15]; 2xDeamidated [N13; N18]; 1xOxidation [M11]	1	0	2603.3	868.437	-1.07	-0.00093	55.4287	6.48
QRPIFIITEYMANGCLLNYLR	1xDeamidated [N13]; 1x4930_adduct44122_H [C15]	1	0	2970.53	990.851	3.57	0.00354	57.6503	6.21
RGEESSEMEQISIIER		93	1	1892.9	946.954	-0.16	-0.00015	34.5648	7.71
RGEESSEMEQISIIER	1xOxidation [M8]	67	1	1908.9	636.97	0.04	3e-05	30.9458	6.9
RGEESSEMEQISIIER	1xDeamidated [Q10]	1	1	1893.89	631.968	2.22	0.0014	37.0084	6.02
RLFLLTVHK		3	1	1126.71	563.859	1.4	0.00079	31.7488	3.05
RWIHQLK		6	1	980.579	490.793	0.37	0.00018	18.5313	2.9
SDIWAFGVLMWEIYSLGK		4	0	2115.06	705.697	6.19	0.00436	58.4855	6.77
SDIWAFGVLMWEIYSLGK	1xOxidation [M10]	1	0	2131.06	711.026	2.66	0.00189	58.4539	2.38
SDIWAFGVLMWEIYSLGKMPYER		2	1	2791.36	931.126	0.08	7e-05	58.2922	8.17
SQAEQLLK		43	0	916.51	458.759	0.92	0.00042	22.8857	2.9
SQAEQLLK	1xDeamidated [Q]	9	0	917.494	459.251	0.71	0.00033	24.4557	2.87
SQAEQLLKQEGK		8	1	1358.73	453.581	1.08	0.00049	21.2838	4.67
SQAEQLLKQEGK	1xDeamidated [Q9]	1	1	1359.71	453.909	0.4	0.00018	22.4252	2.5
STGDPQGVIR		32	0	1029.53	515.27	0.64	0.00033	21.0586	3.24
STGDPQGVIR	1xDeamidated [Q6]	4	0	1030.52	515.763	1.34	0.00069	21.5481	3.18
TKKPLPPTPEEDQILK		75	1	1834.03	612.016	0.15	9e-05	25.8839	6.78
TSPLNFK	1xDeamidated [N5]	14	0	807.425	404.216	0.8	0.00032	29.6204	2.44
TSPLNFK		34	0	806.441	403.724	0.58	0.00023	28.952	2.2
TSPLNFKK		6	1	934.536	467.771	-0.14	-7e-05	21.0266	2.69
TSPLNFKK	1xDeamidated [N5]	5	1	935.52	468.264	0.44	0.0002	22.6371	2.33
VMMNLSHEK	1xOxidation [M]	41	0	1104.52	552.762	-0.89	-0.00049	19.7269	3.33
VMMNLSHEK		10	0	1088.52	544.765	0.15	8e-05	20.4418	2.82
VMMNLSHEK	1xDeamidated [N4]	3	0	1089.51	545.258	1.26	0.00069	22.1767	2.43
VMMNLSHEK	2xOxidation [M2; M3]	10	0	1120.51	560.761	1.38	0.00077	14.1754	2.2
VMMNLSHEK	1xDeamidated [N4]; 1xOxidation [M2]	1	0	1105.5	553.254	-0.67	-0.00037	19.9891	2.19
VMMNLSHEKLVQLYGVCTK	1xCarbamidomethyl [C17]	2	1	2250.14	563.292	0.37	0.00021	39.0208	4.94
VMMNLSHEKLVQLYGVCTK	1xCarbamidomethyl [C17]; 2xOxidation [M2; M3]	2	1	2282.13	761.382	-1.48	-0.00113	42.9156	4.86
VSDFGLSR		30	0	880.452	440.73	0.84	0.00037	28.9434	3.15
VVALYDYMPMNANDLQLR	1xDeamidated [N/Q]	47	0	2127.02	709.681	1.35	0.00096	55.1384	6.24
VVALYDYMPMNANDLQLR	1xOxidation [M]	91	0	2142.04	714.684	0.87	0.00062	49.3011	6.05
VVALYDYMPMNANDLQLR		30	0	2126.04	709.353	1.36	0.00096	56.0167	5.95
VVALYDYMPMNANDLQLR	1xDeamidated [N]; 1xOxidation [M]	40	0	2143.02	715.013	1.64	0.00117	49.5126	5.9
VVALYDYMPMNANDLQLR	1xDeamidated [N]; 2xOxidation [M8; M10]	14	0	2159.01	720.344	1.49	0.00108	44.3314	5.18
VVALYDYMPMNANDLQLR	2xOxidation [M8; M10]	14	0	2158.03	720.015	-0.2	-0.00014	44.096	4.83
VVALYDYMPMNANDLQLRK		5	1	2254.14	752.051	0.69	0.00052	49.3215	6.32
VVALYDYMPMNANDLQLRK	1xDeamidated [N/Q]	8	1	2255.12	752.378	-0.04	-3e-05	48.1692	5.87
VVALYDYMPMNANDLQLRK	1xOxidation [M10]	1	1	2270.13	757.382	0.24	0.00018	44.7481	3.53
VVALYDYMPMNANDLQLRK	2xOxidation [M8; M10]	2	1	2286.13	762.714	0.99	0.00075	37.7355	2.95
VYTIMYSCWHEK	1xCarbamidomethyl [C8]	30	0	1616.72	539.58	0.72	0.00039	36.216	4.58
VYTIMYSCWHEK	1xCarbamidomethyl [C8]; 1xOxidation [M5]	37	0	1632.72	544.911	-0.69	-0.00038	34.1468	4.54
VYTIMYSCWHEK	1xOxidation [M5]	1	0	1575.7	525.904	0.01	0	33.8415	4.11
VYTIMYSCWHEK		12	0	1559.7	520.573	1.6	0.00083	39.6381	4.08
WIHQLK		9	0	824.478	412.743	0.56	0.00023	20.7218	2.36
WRGQYDVAIK		7	1	1235.65	412.556	-0.04	-2e-05	26.3661	4.8
WSPPEVLMYSK		30	0	1336.66	668.833	-1.93	-0.00129	45.4066	3.68
WSPPEVLMYSK	1xOxidation [M8]	49	0	1352.66	676.831	-0.22	-0.00015	44.0787	3.34
YHPCFWIDGQYLCCSQTAK	3xCarbamidomethyl [C4; C13; C14]	21	0	2434.04	812.018	-0.91	-0.00074	43.6883	7.65
YHPCFWIDGQYLCCSQTAK	3xCarbamidomethyl [C4; C13; C14]; 1xDeamidated [Q]	12	0	2435.03	812.352	6.08	0.00493	45.0927	7.63
YHPCFWIDGQYLCCSQTAK	2xCarbamidomethyl [C13; C14]	4	0	2377.02	793.012	0.78	0.00062	45.8956	6.81
YHPCFWIDGQYLCCSQTAK	2xCarbamidomethyl [C4; C13]; 1xDeamidated [Q10]	1	0	2378	793.341	2.31	0.00183	41.7889	4.74
YHPCFWIDGQYLCCSQTAKNAMGCQILENR	4xCarbamidomethyl [C4; C13; C14; C24]	3	1	3720.63	930.912	-0.05	-5e-05	46.8755	10.08
YHPCFWIDGQYLCCSQTAKNAMGCQILENR	2xCarbamidomethyl [C14; C]; 1xOxidation [M22]	3	1	3622.58	906.402	1.94	0.00176	42.2482	2.71
YHPCFWIDGQYLCCSQTAKNAMGCQILENR	3xDeamidated [Q10; Q16; Q25]; 1x4930_adduct44122_H [C4]	1	1	3936.72	788.147	-4.06	-0.0032	44.4767	2.46
YNSDLVQK	1xDeamidated [N2]	17	0	967.473	484.241	1.04	0.0005	21.8077	2.92
YNSDLVQK		31	0	966.489	483.748	-0.28	-0.00013	19.4861	2.91
YPVSQQNK		18	0	963.489	482.248	-0.31	-0.00015	18.4753	2.76
YPVSQQNK	1xDeamidated [N/Q]	3	0	964.473	482.742	3.99	0.00192	15.5315	2.64
YTVSVFAK		25	0	914.498	457.753	1.09	0.0005	33.446	2.48
YVLDDEYTSSVGSK		35	0	1562.72	781.863	-2.71	-0.00212	33.9823	4.35
YVLDDEYTSSVGSKFPVR		4	1	2062.01	688.01	1.23	0.00084	38.4679	5.99
