# Supplementary material for: Design and application of a fluorescent probe for imaging of endogenous Bruton's tyrosine kinase with preserved enzymatic activity
Source: Royal Society of Chemistry journal article supplement (doi:10.1039/d4cb00313f), 2025-01-01
Supplement: d4cb00313f2.pdf [file d4cb00313f2.pdf]

## Supporting Information

### Design and application of a fluorescent probe for imaging of endogenous Bruton's tyrosine kinase with preserved enzymatic activity

Anna P. Valaka<sup>†</sup>, Hampus Nyström<sup>†</sup>, Liliana Håversen<sup>b</sup>, Carlos Benitez-Martin<sup>a</sup>, Clara Schäfer<sup>a</sup>, Woo Suk Jang<sup>c</sup>, Alessandro Camponeschi<sup>c</sup>, Joakim Andréasson<sup>d</sup>, Jan Borén<sup>b</sup> and Morten Grøtli<sup>a\*</sup>

<sup>a</sup>Department of Chemistry and Molecular Biology, University of Gothenburg, 405 30, Gothenburg, Sweden.

<sup>b</sup>Department of Molecular and Clinical Medicine, University of Gothenburg and Sahlgrenska University Hospital, 413 45 Gothenburg, Sweden. <sup>c</sup>Department of Rheumatology and Inflammation Research, Institute of Medicine, Sahlgrenska Academy, University of Gothenburg, Gothenburg, 413 46, Sweden. <sup>d</sup>Department of Chemistry and Chemical Engineering, Chalmers University of Technology, 412 96, Gothenburg, Sweden.

<sup>†</sup>These authors contributed equally. \*Corresponding author.

#### Table of Contents

|                                               |    |
|-----------------------------------------------|----|
| General Information .....                     | 2  |
| Experimental Section .....                    | 3  |
| Molecular Docking.....                        | 3  |
| Chemistry .....                               | 3  |
| LC-MS/MS measurements .....                   | 12 |
| Biochemical Assays.....                       | 13 |
| Cellular Assays and confocal microscopy ..... | 14 |
| Supplementary Figures and Tables.....         | 19 |
| NMR Spectra .....                             | 48 |
| HRMS Spectra .....                            | 78 |
| HPLC Chromatograms .....                      | 81 |
| References .....                              | 83 |

## General Information

All solvents and reagents were obtained from commercial suppliers, stored as indicated by the suppliers, and used without further purification unless otherwise stated. Ibrutinib was purchased from MedChemExpress. Dry THF and DCM were obtained from a solvent purification system (PS-MD-5/7 Inert technology). Reactions were monitored by TLC, LC-MS, and/or HPLC.  $^1\text{H}$  NMR and  $^{13}\text{C}$  NMR spectra were recorded on a 400 MHz Varian, a 600 MHz Bruker Avance Neo, a 700 MHz Bruker Avance III, or an 800 MHz Bruker Avance III HD spectrometer at 25°C. All chemical shifts ( $^1\text{H}$ ,  $^{13}\text{C}$ ) are reported in parts per million ( $\delta$ ) relative to the residual solvent peak ( $\text{CDCl}_3$ : 7.26 ppm, 77.16 ppm;  $(\text{CD}_3)_2\text{SO}$ : 2.50 ppm, 39.52 ppm;  $(\text{CD}_3)_2\text{CO}$ : 2.05 ppm, 29.84 ppm;  $\text{D}_2\text{O}$ : 4.79 ppm). The following abbreviations are used to denote the multiplicities: s = singlet, br s = broad singlet, d = doublet, dd = doublet of doublets, t = triplet, td = triplet of doublets, tt = triplet of triplets, q = quartet, qd = quartet of doublets, m = multiplet. Coupling constants ( $J$ ) are reported in Hz.

TLC was conducted on silica-gel-coated aluminium sheets for normal-phase (Merck TLC Silica gel 60 F<sub>254</sub>) respectively reverse-phase (Merck TLC Silica gel 60 RP-18 F<sub>254s</sub>) and were visualized by UV light ( $\lambda = 254$  nm or 366 nm). LC-MS was performed on a Waters Acquity system (Acquity Arc HPLC system; 2489 UV/Vis Detector; XBridge BEH C18 column, 130Å, 2.5  $\mu\text{m}$ , 2.1 x 50 mm; XBridge BEH C18 Guard column, V-Gd Cart 2.5  $\mu\text{m}$ , 2.1 x 5 mm; Acquity QDa Mass Detector; MeCN:water (0.01% formic acid), 40°C).

Analytical HPLC was performed on a Waters system (2690 Separation Module; 996 Photodiode Array Detector; Chromolith SpeedROD RP-18 endcapped 50-4.6 HPLC column; MeCN:water (0.1% TFA)). Preparative HPLC was performed on a Waters system (1525 Binary HPLC Pump; 2998 Photodiode Array Detector; Atlantis Prep T3 OBD column; MeCN:water (0.1% TFA)), by injecting the crude dissolved in MeOH. Column chromatography was performed on a Selekt or Isolera One flash chromatography system (Biotage) for normal-phase or reverse-phase, respectively. The silica gel was Sfär Silica D Duo 60  $\mu\text{m}$  or Sfär KP-Amino D Duo 50  $\mu\text{m}$  cartridges for normal-phase, and Sfär C18 D Duo 100 Å 30  $\mu\text{m}$  cartridges for reverse-phase (Biotage). For all column chromatography, dry loading was performed using the same type of silica as the stationary phase. The reactions that employed microwave irradiation were performed in capped vials using an Initiator+ Microwave Synthesizer (Biotage) with fixed hold time.

HRMS data were recorded with a QExactive HF Orbitrap mass spectrometer interfaced with Dionex Ultimate 3000 liquid chromatography system (Thermo Fisher Scientific). The instrument operated in full MS mode only, where the ion mass spectra were acquired at a resolution of 120 000, maximum injection time 200 ms for  $3 \times 10^6$  ions. The Orbitrap was calibrated with Pierce LTQ ESI Positive Ion Calibration Solution prior to the analysis, resulting in mass accuracy better than 5 ppm. Electrospray ionization was performed at 4 kV and 320°C using a metal emitter in the ion source. The sample (1 or 10  $\mu\text{L}$ ) was injected onto a reversed-phase XBridge BEH C18 column (3.5  $\mu\text{m}$ , 2.1 x 50 mm, Waters). The analysis was performed using a linear gradient over 2.5 min from 10 to 100% solvent B, followed by isocratic eluted with 100% solvent B for 17.5 min with a flow of 0.300 ml/min (solvent A: water with 0.1% formic acid; solvent B: 80% acetonitrile in water with 0.1% formic acid). Data analysis was performed using the Xcalibur software (Thermo Fischer Scientific).

# Experimental Section

## Molecular Docking

Molecular docking was conducted using the Molecular Operating Environment (MOE) version 2020.0901 (Chemical Computing Group, Montreal, CA). The structure of evobrutinib co-crystallised with BTK was obtained from the Protein Data Bank (PDB ID: 6OMU). The ligand-receptor complex was prepared with the automated QuickPrep script, which added hydrogen atoms, adjusted protonation states to physiological pH, and refined the structure. QuickPrep used the Amber10:EHT force field. Ligands were built in MOE, with protonation states to physiological pH and energy minimization was performed using the MMFF94x force field. Docking employed the AMBER10:EHT force field with the Dock Template function, using the evobrutinib-amine (compound **9**) fragment as a template. Settings included rotatable bonds for ligands, a rigid receptor, the GBVI/WSA dG score function, 1000 placement poses, and 100 refinement poses. The top 10 poses were ranked by their scores, and evaluated based on the warhead orientation, and the distance to Cys481.

## Chemistry

### **3-(5,5-difluoro-7,9-dimethyl-5H-4 $\lambda^4$ ,5 $\lambda^4$ -dipyrrolo[1,2-c:2',1'-f][1,3,2] diazaborinin-3-yl)propanoic acid (**1**)**

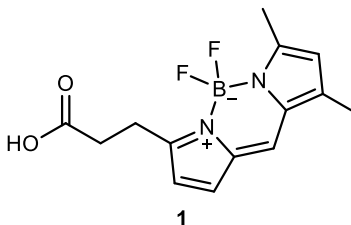

Compound **1** was synthesised according to the literature procedure<sup>1</sup>.

<sup>1</sup>H NMR (600 MHz, CDCl<sub>3</sub>)  $\delta$  7.09 (s, 1H), 6.89 (d,  $J$  = 4.0 Hz, 1H), 6.29 (d,  $J$  = 4.0 Hz, 1H), 6.12 (s, 1H), 3.30 (t,  $J$  = 7.6 Hz, 2H), 2.83 (t,  $J$  = 7.6 Hz, 2H), 2.57 (s, 3H), 2.25 (s, 3H); <sup>13</sup>C NMR (151 MHz, CDCl<sub>3</sub>)  $\delta$  176.0, 160.8, 156.5, 144.0, 133.3, 128.0, 123.9, 120.6, 116.7, 32.7, 23.7, 15.0, 11.3; LC-MS (ESI)  $m/z$ : [M+H]<sup>+</sup> calcd. for C<sub>14</sub>H<sub>16</sub>BF<sub>2</sub>N<sub>2</sub>O<sub>2</sub>: 293.13, found: 293.09.

### **tert-butyl (2-(3-(5,5-difluoro-7,9-dimethyl-5H-4 $\lambda^4$ ,5 $\lambda^4$ -dipyrrolo[1,2-c:2',1'-f][1,3,2] diazaborinin-3-yl)propanamido)ethyl)carbamate (**2**)**

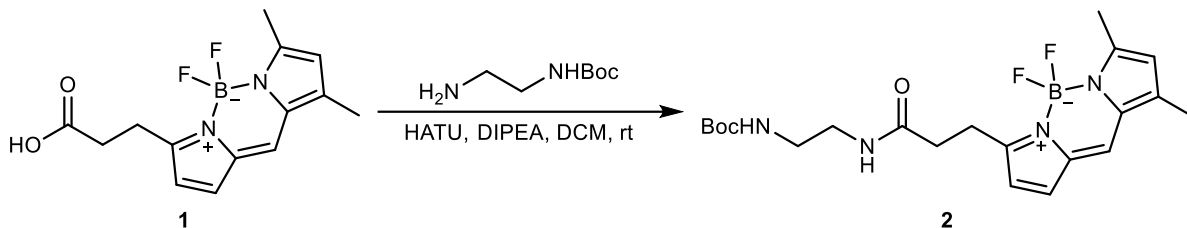

A 100 ml round-bottom flask was charged with **1** (202 mg, 0.69 mmol, 1.0 eq.) and HATU (315 mg, 0.83 mmol, 1.2 eq.), and the flask was purged with  $\text{N}_2$ . Then, dry DCM (8 ml), DIPEA (0.14 ml, 0.83 mmol, 1.2 eq.), and *N*-Boc-ethylenediamine (0.13 ml, 0.83 mmol, 1.2 eq.) as a solution in dry DCM (2 ml), were added in rapid succession. The orange solution was stirred at room temperature. After 40 min, LC-MS indicated full consumption of the starting material, and the reaction mixture was concentrated under reduced pressure. The residual red oil was dissolved in EtOAc (75 ml), washed with saturated aqueous  $\text{NH}_4\text{Cl}$  (3x50 ml) and water (50 ml), and concentrated under reduced pressure. The crude was purified by column chromatography (silica 10 g, 0–20% MeOH:DCM) to afford **2** (eluted at 10% MeOH) as a red solid (282 mg, 94%).

$^1\text{H}$  NMR (400 MHz,  $(\text{CD}_3)_2\text{CO}$ )  $\delta$  7.51 (s, 1H), 7.28 (br s, 1H), 7.03 (d,  $J = 4.1$  Hz, 1H), 6.37 (d,  $J = 4.1$  Hz, 1H), 6.25 (s, 1H), 6.09 (br s, 1H), 3.30 (q,  $J = 6.0$  Hz, 2H), 3.23 (t,  $J = 7.7$  Hz, 2H), 3.17 (q,  $J = 5.9$  Hz, 2H), 2.59 (t,  $J = 7.7$  Hz, 2H), 2.51 (s, 3H), 2.28 (s, 3H), 1.40 (s, 9H);  $^{13}\text{C}$  NMR (101 MHz,  $(\text{CD}_3)_2\text{CO}$ )  $\delta$  172.3, 160.2, 159.3, 156.9, 144.9, 135.8, 134.4, 129.5, 125.6, 121.0, 117.7, 78.7, 41.2, 40.3, 35.4, 28.6, 25.1, 14.8, 11.2; LC-MS (ESI)  $m/z$ :  $[\text{M}+\text{Na}]^+$  calcd. for  $\text{C}_{21}\text{H}_{29}\text{BF}_2\text{N}_4\text{NaO}_3$ : 457.22, found: 457.32.

***tert*-butyl 4-(3-(5,5-difluoro-7,9-dimethyl-5*H*- $\lambda^4,5\lambda^4$ -dipyrrolo[1,2-*c*:2',1'-*f*][1,3,2]diazaborinin-3-yl)propanamido)piperidine-1-carboxylate (**3**)**

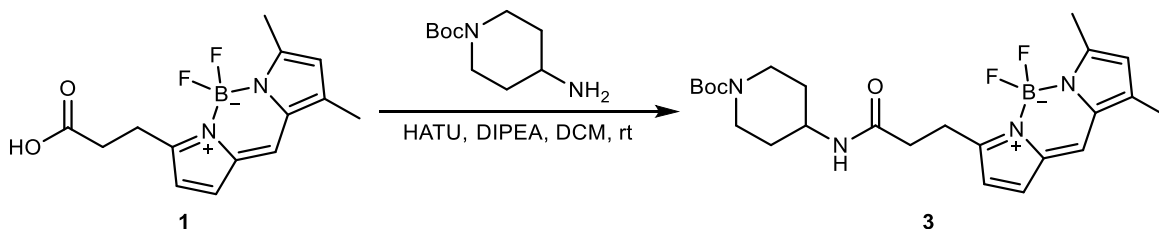

A 50 ml round-bottom flask was charged with **1** (76 mg, 0.26 mmol, 1.0 eq.) and HATU (119 mg, 0.31 mmol, 1.2 eq.), and the flask was purged with  $\text{N}_2$ . Then, dry DCM (4 ml), DIPEA (54  $\mu\text{L}$ , 0.31 mmol, 1.2 eq.), and 4-amino-1-Boc-piperidine (63 mg, 0.31 mmol, 1.2 eq.) as a solution in dry DCM (2 ml), were added in rapid succession. The orange solution was stirred at room temperature. After 30 min, LC-MS indicated full consumption of the starting material, and the reaction mixture was concentrated under reduced pressure. The residual red oil was dissolved in EtOAc (40 ml), washed with saturated aqueous  $\text{NH}_4\text{Cl}$  (3x40 ml) and water (40 ml), and concentrated under reduced pressure. The crude was purified by column chromatography (silica 10 g, 0–20% MeOH:DCM) to afford **3** (eluted at 15% MeOH) as a red solid (109 mg, 88%).

$^1\text{H}$  NMR (600 MHz,  $(\text{CD}_3)_2\text{CO}$ )  $\delta$  7.50 (s, 1H), 7.11 (d,  $J = 7.7$  Hz, 1H), 7.03 (d,  $J = 4.0$  Hz, 1H), 6.35 (d,  $J = 4.0$  Hz, 1H), 6.24 (s, 1H), 3.99-3.91 (m, 2H), 3.91-3.84 (m, 1H), 3.23 (t,  $J = 7.6$  Hz, 2H), 2.96-2.79 (m, 2H), 2.56 (t,  $J = 7.6$  Hz, 2H), 2.51 (s, 3H), 2.28 (s, 3H), 1.84-1.79 (m, 2H), 1.42 (s, 9H), 1.31 (qd,  $J = 11.7, 4.1$  Hz, 2H);

$^{13}\text{C}$  NMR (151 MHz,  $(\text{CD}_3)_2\text{CO}$ )  $\delta$  171.0, 160.2, 159.3, 155.0, 144.9, 135.8, 134.4, 129.5, 125.6, 121.0, 117.7, 79.4, 47.2, 43.8, 43.0, 35.5, 32.6, 28.5, 25.1, 14.8, 11.2; LC-MS (ESI)  $m/z$ :  $[\text{M}+\text{Na}]^+$  calcd. for  $\text{C}_{24}\text{H}_{33}\text{BF}_2\text{N}_4\text{NaO}_3$ : 497.25, found: 497.39.

**2-(3-(5,5-difluoro-7,9-dimethyl-5H-4 $\lambda^4$ ,5 $\lambda^4$ -dipyrrolo[1,2-c:2',1'-f][1,3,2]diazaborinin-3-yl)propanamido)ethan-1-aminium chloride (BODIPY-FL-1)**

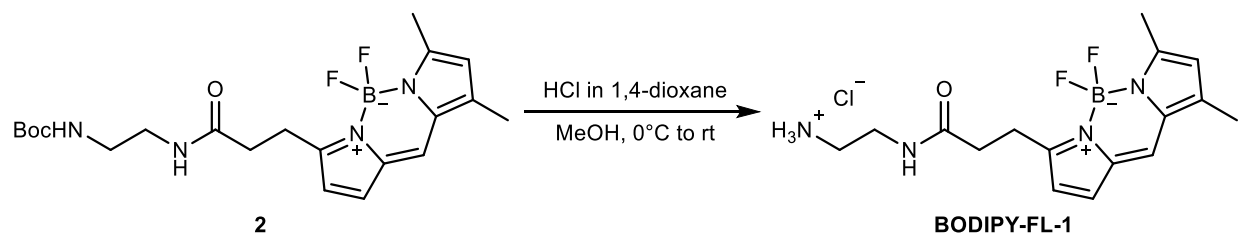

In a 25 ml round-bottom flask, **2** (62 mg, 0.14 mmol, 1.0 eq.) was dissolved in MeOH (5 ml), cooled on ice, and purged with  $\text{N}_2$ . HCl 4M in 1,4-dioxane (0.34 ml, 1.4 mmol, 10 eq.) was added dropwise and the red solution was stirred at room temperature. After 23 h, LC-MS indicated full consumption of the starting material, and the solution was concentrated under reduced pressure. The residual red oil was taken up in water (10 ml) and washed with EtOAc (10 ml). The aqueous layer was concentrated and dried under reduced pressure to afford **BODIPY-FL-1** as a red oil (53 mg, 100%), that was used in the next step without further purification.

$^1\text{H}$  NMR (600 MHz,  $\text{D}_2\text{O}$ )  $\delta$  7.43-7.34 (m, 3H), 7.00 (d,  $J = 4.0$  Hz, 1H), 6.51 (d,  $J = 4.2$  Hz, 1H), 6.40 (s, 1H), 6.33 (d,  $J = 4.0$  Hz, 1H), 6.26 (s, 1H), 3.51-3.45 (m, 4H), 3.17-3.07 (m, 8H), 2.73 (t,  $J = 7.3$  Hz, 2H), 2.69 (t,  $J = 7.4$  Hz, 2H), 2.48 (s, 3H), 2.47 (s, 3H), 2.30 (s, 3H), 2.21 (s, 3H);  $^{13}\text{C}$  NMR (151 MHz,  $\text{D}_2\text{O}$ )  $\delta$  176.0, 175.4, 161.6, 159.9, 155.4, 150.7, 146.5, 135.4, 133.0, 128.5, 128.1, 125.7, 124.6, 121.0, 119.2, 116.3, 39.1, 39.0, 36.7, 34.4, 33.8, 24.0, 23.6, 14.1, 13.8, 11.2, 10.4; LC-MS (ESI)  $m/z$ :  $[\text{M}+\text{H}]^+$  calcd. for  $\text{C}_{16}\text{H}_{22}\text{BF}_2\text{N}_4\text{O}$ : 335.18, found: 335.27.

**Note:** the NMR spectra of **BODIPY-FL-1** in  $\text{D}_2\text{O}$  contained two sets of peaks, believed to be due to an equilibrium between protonated and neutral amine. All signals for the pair are listed above. The compound was homogenous in LC-MS analysis.

**4-(3-(5,5-difluoro-7,9-dimethyl-5H-4 $\lambda^4$ ,5 $\lambda^4$ -dipyrrolo[1,2-c:2',1'-f][1,3,2]diazaborinin-3-yl)propanamido)piperidin-1-ium chloride (BODIPY-FL-2)**

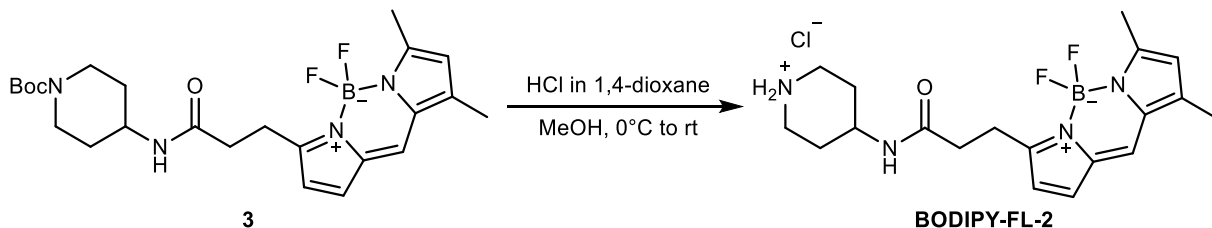

In a 25 ml round-bottom flask, **3** (30 mg, 0.063 mmol, 1.0 eq.) was dissolved in MeOH (3 ml), cooled on ice, and purged with N<sub>2</sub>. HCl 4M in 1,4-dioxane (0.15 ml, 0.63 mmol, 10 eq.) was added dropwise and the orange solution was stirred at room temperature. After 24 h, LC-MS indicated full consumption of the starting material, and the solution was concentrated under reduced pressure. The residual red oil was taken up in water (10 ml) and washed with EtOAc (10 ml). The aqueous layer was concentrated and dried under reduced pressure to afford **BODIPY-FL-2** as a red oil (26 mg, 100%), that was used in the next step without further purification.

<sup>1</sup>H NMR (600 MHz, D<sub>2</sub>O) δ 7.26 (s, 1H), 6.92 (d, *J* = 4.0 Hz, 1H), 6.26 (d, *J* = 4.0 Hz, 1H), 6.18 (s, 1H), 3.93-3.86 (m, 1H), 3.43-3.36 (m, 2H), 3.12-3.04 (m, 4H), 2.61 (t, *J* = 7.4 Hz, 2H), 2.42 (s, 3H), 2.14 (s, 3H), 2.07-2.00 (m, 2H), 1.69-1.60 (m, 2H); <sup>13</sup>C NMR (151 MHz, D<sub>2</sub>O) δ 174.3, 161.3, 155.3, 146.2, 135.2, 133.0, 128.5, 124.5, 120.9, 116.4, 44.1, 42.6, 34.4, 27.6, 24.2, 14.1, 10.4; LC-MS (ESI) *m/z*: [M+H]<sup>+</sup> calcd. for C<sub>19</sub>H<sub>26</sub>BF<sub>2</sub>N<sub>4</sub>O: 375.22, found: 375.29.

**tert-butyl 4-(((6-amino-5-chloropyrimidin-4-yl)amino)methyl)piperidine-1-carboxylate (6)**

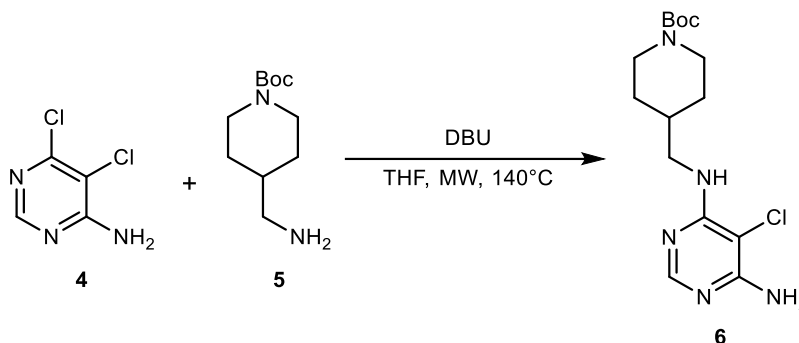

Compound **6** was synthesised using a modified literature procedure<sup>2</sup>:

An oven-dried 20 ml microwave vial was charged with **4** (1.00 g, 6.11 mmol, 1.0 eq.), **5** (1.42 ml, 6.72 mmol, 1.1 eq.), DBU (1.82 ml, 12.2 mmol, 2.0 eq.), and dry THF (8 ml), and purged with N<sub>2</sub>. The reaction mixture was irradiated at 140°C in the microwave reactor for 4 h, until reversed-phase TLC (MeCN:water 4:1; *R<sub>f</sub>*(**4**) = 0.79; *R<sub>f</sub>*(**6**) = 0.46) indicated full consumption of the starting material. The white solids were filtered, and the orange filtrate was concentrated under reduced pressure. The residual orange oil was dissolved in EtOAc, washed once with water, three times with saturated aqueous NH<sub>4</sub>Cl, and once with brine. The organic layer was concentrated under reduced pressure and dried under high vacuum to afford a pale orange solid (1.47 g, 70%).

<sup>1</sup>H NMR (600 MHz, (CD<sub>3</sub>)<sub>2</sub>SO) δ 7.83 (s, 1H), 6.68 (t, *J* = 6.0 Hz, 1H), 6.43 (br s, 2H), 3.90 (s, 2H), 3.21 (t, *J* = 6.5 Hz, 2H), 2.64 (br s, 2H), 1.79-1.70 (m, 1H), 1.59 (d, *J* = 13.4 Hz, 2H), 1.38 (s, 9H), 0.97 (qd, *J* = 12.2, 4.2 Hz, 2H); <sup>13</sup>C NMR (201 MHz, (CD<sub>3</sub>)<sub>2</sub>SO) δ 158.3, 157.3, 154.8, 153.9, 90.3, 78.4, 45.6, 43.7, 42.7, 35.6, 29.5, 28.1; LC-MS (ESI) *m/z*: [M+H]<sup>+</sup> calcd. for C<sub>15</sub>H<sub>25</sub>ClN<sub>5</sub>O<sub>2</sub>: 342.17, found: 342.19.

**tert-butyl 4-(((6-amino-5-(4-phenoxyphenyl)pyrimidin-4-yl)amino)methyl)piperidine-1-carboxylate (7)**

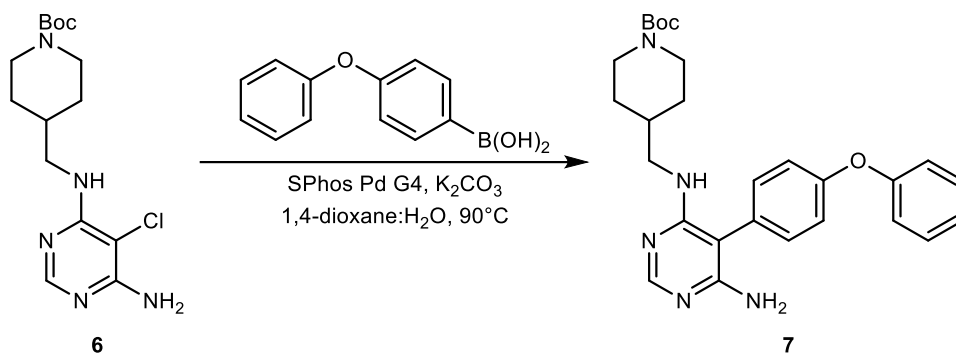

Compound **7** was synthesised using a modified literature procedure<sup>2</sup>:

A 20 ml microwave vial was charged with **6** (506 mg, 1.48 mmol, 1.0 eq.), K<sub>2</sub>CO<sub>3</sub> (409 mg, 2.96 mmol, 2.0 eq.), 4-phenoxyphenylboronic acid (475 mg, 2.22 mmol, 1.5 eq.), SPhos Pd G4 (29.4 mg, 0.037 mmol, 2.5 mol%), and purged with argon. 1,4-dioxane (10 ml) degassed with argon, and H<sub>2</sub>O (2.5 ml), were added and the solution was heated to 90°C, upon it changed colour from yellow to orange. After 20 h, LC-MS indicated

full consumption of the starting material. The reaction mixture was filtered on celite, and the filtrate was concentrated under reduced pressure. The crude was triturated with EtOAc multiple times, until no more precipitate was formed, to afford **7** as a white solid (533 mg, 76%).

$^1\text{H}$  NMR (700 MHz,  $(\text{CD}_3)_2\text{SO}$ )  $\delta$  7.94 (s, 1H), 7.42 (t,  $J = 7.7$  Hz, 2H), 7.21 (d,  $J = 8.5$  Hz, 2H), 7.16 (tt,  $J = 7.4$ , 1.1 Hz, 1H), 7.13-7.09 (m, 4H), 5.48-5.39 (m, 3H), 3.93-3.85 (m, 2H), 3.12 (t,  $J = 6.6$  Hz, 2H), 2.73-2.55 (m, 2H), 1.75-1.68 (m, 1H), 1.56-1.50 (m, 2H), 0.90 (qd,  $J = 12.1$ , 4.4 Hz, 2H);  $^{13}\text{C}$  NMR (151 MHz,  $(\text{CD}_3)_2\text{SO}$ )  $\delta$  160.0, 159.5, 156.6, 156.3, 156.0, 153.8, 132.2, 130.0, 128.1, 123.5, 119.9, 118.8, 96.1, 78.4, 45.5, 43.7, 42.8, 35.5, 29.4, 28.1; LC-MS (ESI)  $m/z$ :  $[\text{M}+\text{H}]^+$  calcd. for  $\text{C}_{27}\text{H}_{34}\text{N}_5\text{O}_3$ : 476.27, found: 476.35.

#### 4-(((6-amino-5-(4-phenoxyphenyl)pyrimidin-4-yl)amino)methyl)piperidin-1-ium chloride (**8**)

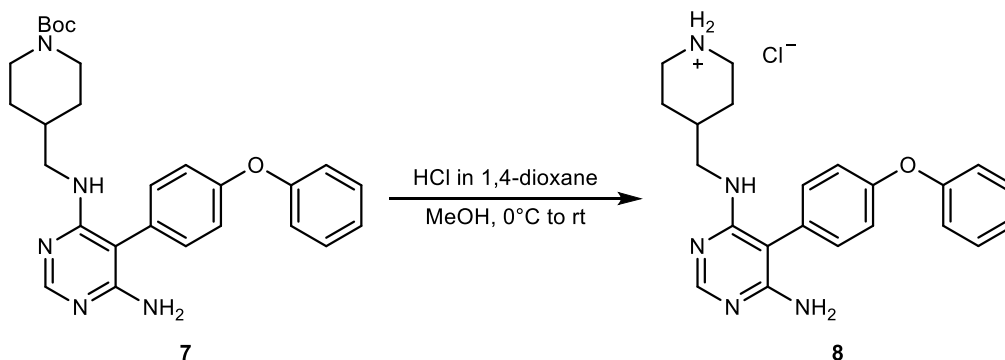

Compound **8** was synthesised using a modified literature procedure<sup>2</sup>:

In a 100 ml round-bottom flask, **7** (635 mg, 1.34 mmol, 1.0 eq.) was suspended in MeOH (25 ml), cooled on ice, and purged with  $\text{N}_2$ . HCl 4M in 1,4-dioxane (3.20 ml, 13.4 mmol, 10 eq.) was added dropwise and the white suspension was stirred at room temperature. After 18 h, LC-MS indicated full consumption of the starting material. The mixture was concentrated under reduced pressure to afford **8** as a pale yellow crystalline solid (550 mg, 100%), that was used in the next step without further purification.

LC-MS (ESI)  $m/z$ :  $[\text{M}+\text{H}]^+$  calcd. for  $\text{C}_{22}\text{H}_{26}\text{N}_5\text{O}$ : 376.21, found: 376.35.

**Note:** The crude salt **8** performed well in the amide coupling to form evobrutinib (**10**) by basification *in situ* with additional equivalents of DIPEA. However, in the *N*-alkylation with 2-(bromomethyl)acrylic acid to form **11**, the free amine **9** in high purity performed better. The basification and purification procedures are described below.



### 5-(4-phenoxyphenyl)-*N*<sup>4</sup>-(piperidin-4-ylmethyl)pyrimidine-4,6-diamine (**9**)

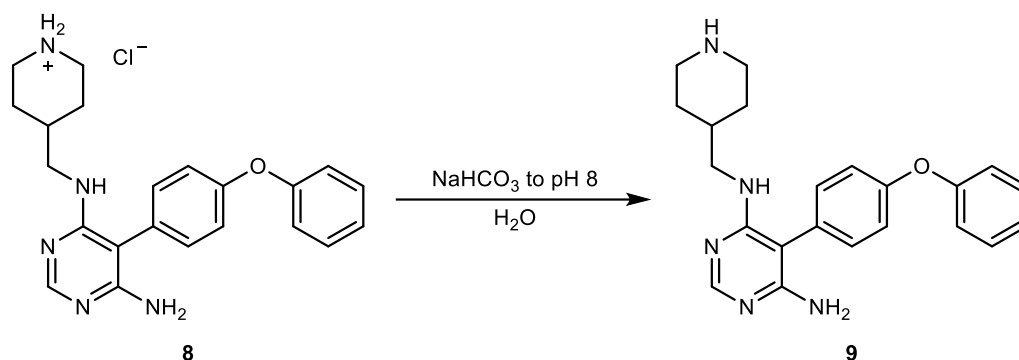

In a 50 ml round-bottom flask, **8** (240 mg, 0.58 mmol, 1.0 eq.) was dissolved in water (5 ml), and the salt was basified to pH 8 by addition of a saturated aqueous NaHCO<sub>3</sub> solution. The water was removed under reduced pressure, and the free amine was purified by column chromatography (KP-Amino silica 11 g, 0–100% EtOAc:pentane, then 0–25% MeOH:EtOAc) to afford **9** (eluted at 15% MeOH) as a pale yellow solid (119 mg, 54%).

<sup>1</sup>H NMR (600 MHz, (CD<sub>3</sub>)<sub>2</sub>SO) δ 7.94 (s, 1H), 7.41 (t, *J* = 7.7 Hz, 2H), 7.21 (d, *J* = 8.1 Hz, 2H), 7.16 (t, *J* = 7.4 Hz, 1H), 7.13–7.09 (m, 4H), 5.41 (s, 2H), 5.29 (t, *J* = 6.2 Hz, 1H), 3.10 (t, *J* = 6.6 Hz, 2H), 2.86 (d, *J* = 12.0 Hz, 2H), 2.34 (t, *J* = 11.9 Hz, 2H), 1.63–1.53 (m, 1H), 1.46 (d, *J* = 12.5 Hz, 2H), 0.91 (qd, *J* = 12.2, 4.0 Hz, 2H); <sup>13</sup>C NMR (151 MHz, (CD<sub>3</sub>)<sub>2</sub>SO) δ 160.0, 159.5, 156.6, 156.3, 156.0, 132.2, 130.0, 128.1, 123.5, 120.0, 118.7, 96.0, 46.4, 45.9, 36.2, 30.9; LC-MS (ESI) *m/z*: [M+H]<sup>+</sup> calcd. for C<sub>22</sub>H<sub>26</sub>N<sub>5</sub>O: 376.21, found: 376.35.

### 1-(4-(((6-amino-5-(4-phenoxyphenyl)pyrimidin-4-yl)amino)methyl)piperidin-1-yl)prop-2-en-1-one (**10**)

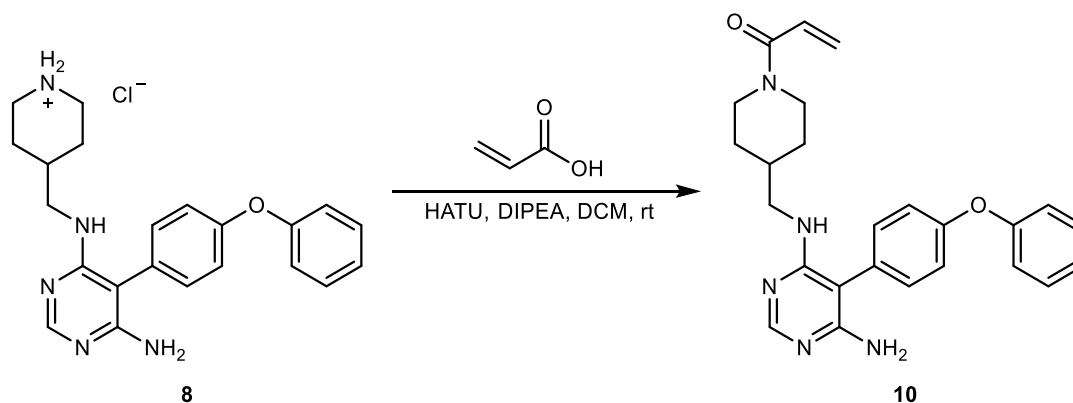

In a 25 ml round-bottom flask purged with N<sub>2</sub>, **8** (54 mg, 0.13 mmol, 1.2 eq.) was dissolved in dry DCM (2 ml) and basified by the addition of DIPEA (23 μL, 0.13 mmol, 1.2 eq.). The colourless solution was stirred at room temperature for 10 min. A 50 ml round-bottom flask was charged with acrylic acid (8 μL, 0.11 mmol, 1.0 eq.) and HATU (50 mg, 0.13 mmol, 1.2 eq.), and the flask was purged with N<sub>2</sub>. Then, dry DCM (4 ml), DIPEA (23 μL, 0.13 mmol, 1.2 eq.), and the amine solution in the other flask, were added in rapid succession. The pale yellow solution was stirred at room temperature. After 20 min, LC-MS indicated full consumption

of the starting material, and the reaction mixture was concentrated under reduced pressure. The crude was purified by reversed-phase column chromatography (C18 silica 12 g, 0–100% MeCN:water) to afford **10** (eluted at 70% MeCN) as a white solid (16 mg, 35%).

$^1\text{H}$  NMR (600 MHz,  $(\text{CD}_3)_2\text{SO}$ )  $\delta$  7.95 (s, 1H), 7.42 (t,  $J$  = 7.9 Hz, 2H), 7.21 (d,  $J$  = 8.4 Hz, 2H), 7.16 (t,  $J$  = 7.4 Hz, 1H), 7.13–7.09 (m, 4H), 6.77 (dd,  $J$  = 16.7, 10.5 Hz, 1H), 6.05 (dd,  $J$  = 16.7, 2.4 Hz, 1H), 5.62 (dd,  $J$  = 10.4, 2.4 Hz, 1H), 5.50–5.39 (m, 3H), 4.35 (d,  $J$  = 13.0 Hz, 1H), 3.99 (d,  $J$  = 13.6 Hz, 1H), 3.13 (t,  $J$  = 6.6 Hz, 2H), 2.96 (t,  $J$  = 12.1 Hz, 1H), 2.57 (t,  $J$  = 11.2 Hz, 1H), 1.87–1.78 (m, 1H), 1.60 (t,  $J$  = 12.7 Hz, 2H), 1.00–0.87 (m, 2H);  $^{13}\text{C}$  NMR (151 MHz,  $(\text{CD}_3)_2\text{SO}$ )  $\delta$  164.1, 159.9, 159.5, 156.6, 156.2, 156.1, 132.3, 130.0, 128.6, 128.0, 126.8, 123.5, 119.9, 118.8, 96.1, 45.4, 45.0, 41.4, 35.7, 30.4, 29.3; HRMS (ESI)  $m/z$ :  $[\text{M}+\text{H}]^+$  calcd. for  $\text{C}_{25}\text{H}_{28}\text{N}_5\text{O}_2$ : 430.2238, found: 430.2222. Characterisation data was consistent with the literature reference<sup>2</sup>.

### 2-((4-(((6-amino-5-(4-phenoxyphenyl)pyrimidin-4-yl)amino)methyl)piperidin-1-yl)methyl)acrylic acid (**11**)

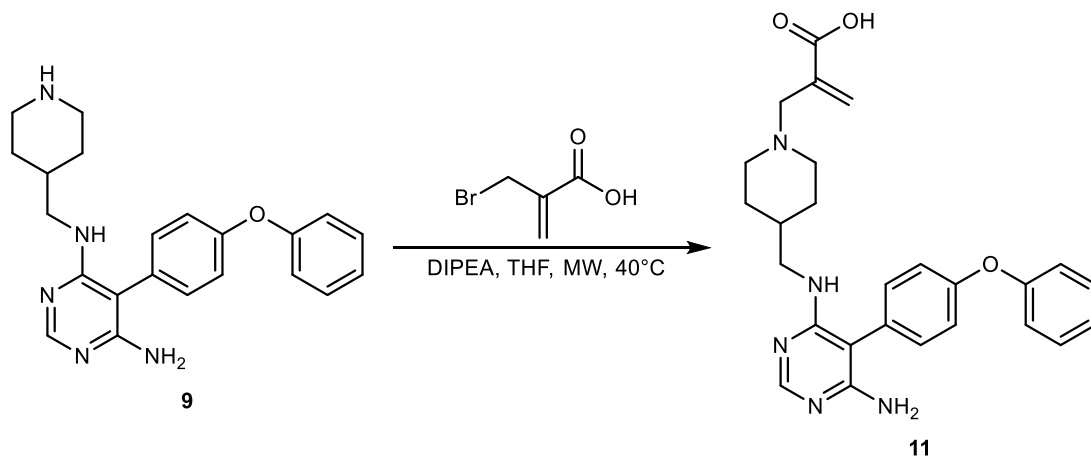

Compound **11** was synthesised using a modified literature procedure<sup>3</sup>:

A 5 ml microwave vial was charged with **9** (80 mg, 0.21 mmol, 1.0 eq.), 2-(bromomethyl)acrylic acid (32 mg, 0.19 mmol, 0.9 eq.), dry THF (3 ml), and purged with  $\text{N}_2$ . DIPEA (37  $\mu\text{L}$ , 0.21 mmol, 1.0 eq.) was added and the reaction mixture was irradiated at 40°C in the microwave reactor for 15 min. After this time, HPLC indicated full consumption of the starting material, and the reaction mixture was concentrated under reduced pressure. The crude was purified by reversed-phase column chromatography (C18 silica 12 g, 0–100% MeCN:water) to afford **11** (eluted at 40% MeCN) as a white crystalline solid (61 mg, 62%).

$^1\text{H}$  NMR (600 MHz,  $(\text{CD}_3)_2\text{SO}$ )  $\delta$  7.94 (s, 1H), 7.41 (t,  $J$  = 7.8 Hz, 2H), 7.22 (d,  $J$  = 8.6 Hz, 2H), 7.16 (t,  $J$  = 7.4 Hz, 1H), 7.13–7.09 (m, 4H), 6.03 (s, 1H), 5.55 (s, 1H), 5.47–5.39 (m, 3H), 3.34 (s, 2H), 3.14 (t,  $J$  = 6.4 Hz, 2H), 2.97–2.92 (m, 2H), 2.27–2.19 (m, 2H), 1.69–1.60 (m, 3H), 1.16–1.06 (m, 2H);  $^{13}\text{C}$  NMR (176 MHz,  $(\text{CD}_3)_2\text{SO}$ )  $\delta$  168.1, 160.1, 159.5, 156.6, 156.4, 156.1, 136.8, 132.3, 130.1, 128.1, 124.8, 123.6, 120., 118.8, 96.2, 58.5, 51.5, 45.3, 34.5, 28.6; LC-MS (ESI)  $m/z$ :  $[\text{M}+\text{H}]^+$  calcd. for  $\text{C}_{26}\text{H}_{30}\text{N}_5\text{O}_3$ : 460.23, found: 460.32.

**2-((4-(((6-amino-5-(4-phenoxyphenyl)pyrimidin-4-yl)amino)methyl)piperidin-1-yl)methyl)-N-(2-(3-(5,5-difluoro-7,9-dimethyl-5H-4λ<sup>4</sup>,5λ<sup>4</sup>-dipyrrolo[1,2-c:2',1'-f][1,3,2]diazaborinin-3-yl)propanamido)ethyl)acrylamide (Evo-1)**

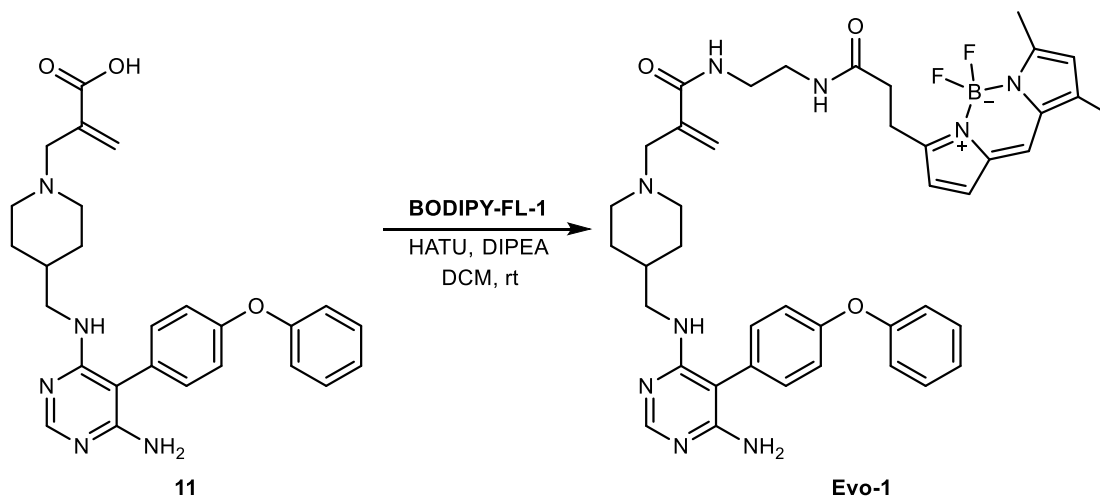

In a 25 ml round-bottom flask purged with N<sub>2</sub>, **BODIPY-FL-1** (51 mg, 0.14 mmol, 1.2 eq.) was dissolved in dry DCM (3 ml) and basified by the addition of DIPEA (24 μL, 0.14 mmol, 1.2 eq.). The red solution was stirred at room temperature for 10 min. A 50 ml round-bottom flask was charged with **11** (52 mg, 0.11 mmol, 1.0 eq.) and HATU (52 mg, 0.14 mmol, 1.2 eq.), and the flask was purged with N<sub>2</sub>. Then, dry DCM (5 ml), DIPEA (24 μL, 0.14 mmol, 1.2 eq.), and the amine solution in the other flask, were all added in rapid succession. The red solution was stirred at room temperature. After 45 min, LC-MS indicated full consumption of the starting material, and the reaction mixture was concentrated under reduced pressure. The crude was purified by preparative-HPLC (C18 column, 20-80% MeCN:water with 0.1% TFA), to afford **Evo-1** as a brown solid (38 mg, 43%).

<sup>1</sup>H NMR (700 MHz, (CD<sub>3</sub>)<sub>2</sub>CO) δ 8.29 (s, 1H), 7.51 (s, 1H), 7.42 (t, *J* = 7.6 Hz, 2H), 7.37 (d, *J* = 8.1 Hz, 2H), 7.19 (tt, *J* = 7.4, 1.1 Hz, 1H), 7.12 (d, *J* = 8.4 Hz, 2H), 7.07 (d, *J* = 7.8 Hz, 2H), 7.03 (d, *J* = 4.0 Hz, 1H), 6.37 (d, *J* = 4.0 Hz, 1H), 6.27 (s, 1H), 6.25 (s, 1H), 6.04 (s, 1H), 4.08 (br s, 2H), 3.66 (d, *J* = 12.1 Hz, 2H), 3.46-3.35 (m, 6H), 3.21 (t, *J* = 7.8 Hz, 2H), 3.02 (t, *J* = 13.0 Hz, 2H), 2.62 (t, *J* = 7.7 Hz, 2H), 2.50 (s, 3H), 2.28 (s, 3H), 2.00-1.95 (m, 2H), 1.64 (q, *J* = 13.5 Hz, 2H); <sup>13</sup>C NMR (176 MHz, (CD<sub>3</sub>)<sub>2</sub>CO) δ 173.5, 167.8, 161.5, 160.5, 159.1, 158.9, 157.5, 154.1, 149.3, 145.2, 135.9, 135.0, 134.5, 133.5, 131.0, 129.7, 129.4, 125.8, 124.8, 124.5, 121.2, 121.1, 120.1, 117.5, 96.5, 58.1, 53.2, 46.5, 40.9, 39.1, 35.2, 34.8, 27.9, 25.1, 15.0, 11.3; HRMS (ESI) *m/z*: [M+H]<sup>+</sup> calcd. for C<sub>42</sub>H<sub>49</sub>BF<sub>2</sub>N<sub>9</sub>O<sub>3</sub>: 776.4014, found: 776.3997.

***N*-(1-(2-((4-(((6-amino-5-(4-phenoxyphenyl)pyrimidin-4-yl)amino)methyl)piperidin-1-yl)methyl)acryloyl)piperidin-4-yl)-3-(5,5-difluoro-7,9-dimethyl-5*H*-4 $\lambda^4$ ,5 $\lambda^4$ -dipyrrolo[1,2-*c*:2',1'-*f*][1,3,2]diazaborinin-3-yl)propanamide (Evo-2)**

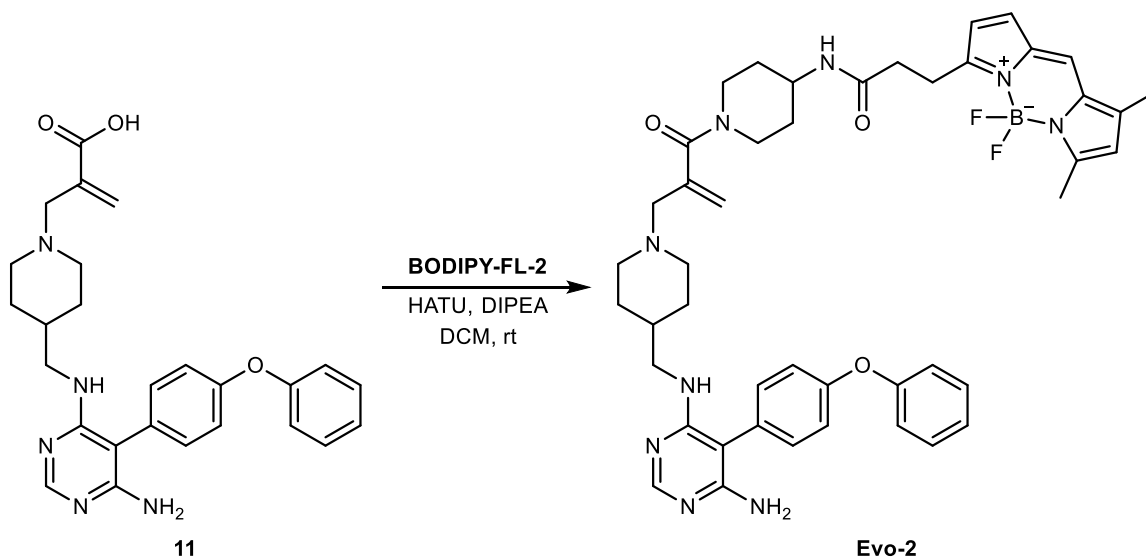

In a 25 ml round-bottom flask purged with N<sub>2</sub>, **BODIPY-FL-2** (65 mg, 0.16 mmol, 1.2 eq.) was dissolved in dry DCM (3 ml) and basified by the addition of DIPEA (28  $\mu$ L, 0.16 mmol, 1.2 eq.). The red solution was stirred at room temperature for 10 min. A 50 ml round-bottom flask was charged with **11** (61 mg, 0.13 mmol, 1.0 eq.) and HATU (61 mg, 0.16 mmol, 1.2 eq.), and the flask was purged with N<sub>2</sub>. Then, dry DCM (5 ml), DIPEA (28  $\mu$ L, 0.16 mmol, 1.2 eq.), and the amine solution in the other flask, were all added in rapid succession. The red solution was stirred at room temperature. After 1 h, LC-MS indicated full consumption of the starting material, and the reaction mixture was concentrated under reduced pressure. The crude was purified by preparative-HPLC (C18 column, 20–80% MeCN:water with 0.1% TFA), to afford **Evo-2** as a black solid (75 mg, 69%).

<sup>1</sup>H NMR (600 MHz, (CD<sub>3</sub>)<sub>2</sub>CO)  $\delta$  8.33 (s, 1H), 7.52 (s, 1H), 7.45-7.39 (m, 4H), 7.19 (t, *J* = 7.4 Hz, 1H), 7.15 (d, *J* = 8.5 Hz, 2H), 7.08 (d, *J* = 7.5 Hz, 2H), 7.04 (d, *J* = 4.0 Hz, 1H), 6.76 (t, *J* = 6.3 Hz, 1H), 6.35 (d, *J* = 4.0 Hz, 1H), 6.26 (s, 1H), 5.95 (s, 1H), 5.71 (s, 1H), 4.38-4.19 (m, 1H), 4.17-4.00 (m, 3H), 3.99-3.93 (m, 1H), 3.71 (br s, 2H), 3.46 (br s, 2H), 3.32 (br s, 1H), 3.22 (t, *J* = 7.7 Hz, 2H), 3.09-2.92 (m, 3H), 2.56 (t, *J* = 7.6 Hz, 2H), 2.51 (s, 3H), 2.29 (s, 3H), 2.08-2.06 (m, 1H), 2.03-1.98 (m, 2H), 1.95-1.89 (m, 2H), 1.72-1.61 (m, 2H), 1.52-1.39 (m, 2H); <sup>13</sup>C NMR (151 MHz, (CD<sub>3</sub>)<sub>2</sub>CO)  $\delta$  171.2, 168.7, 161.4, 161.4, 161.1, 160.4, 159.3, 159.1, 157.5, 154.2, 149.4, 145.0, 135.8, 134.4, 133.5, 130.9, 129.5, 127.1, 125.7, 124.8, 124.5, 121.0, 120.0, 117.7, 96.5, 59.8, 53.0, 47.2, 47.1, 46.4, 35.4, 34.9, 32.9, 31.9, 27.9, 25.1, 14.9, 11.2; HRMS (ESI) *m/z*: [M+H]<sup>+</sup> calcd. for C<sub>45</sub>H<sub>53</sub>BF<sub>2</sub>N<sub>9</sub>O<sub>3</sub>: 816.4327, found: 816.4324.

## LC-MS/MS Measurements

### ***Protein Labelling and Digestion***

Full-length recombinant BTK (MRC PPU Reagents, University of Dundee, UK, #DU12110) was diluted to 5  $\mu$ M in Tris buffer (50 mM Tris-HCl, 10 mM MgCl<sub>2</sub>, 100 mM KCl, 50  $\mu$ M DTT,

0.05% Tween-20, pH 7.4) and treated with either DMSO or 50  $\mu$ M of **Evo-2**. The samples (50  $\mu$ L, 20  $\mu$ g BTK), were incubated at room temperature for 1 h. **Evo-2** treatment resulted in a red precipitate, dissolved by adding 2% SDS to form a green solution. Samples were processed using a modified SP3 method<sup>4</sup> reduced in 10 mM DTT at 56°C for 30 min, alkylated in 20 mM iodoacetamide at room temperature for 30 min and bound to washed hydrophobic and hydrophilic Sera-Mag™ SpeedBeads (Carboxylate-Modified, Cytiva) at a 10:1 bead to protein ratio. Proteins were precipitated with 70% acetonitrile, washed with 80% ethanol, and dried. Beads were resuspended in 50 mM TEAB, and proteins were digested overnight with Trypsin/Lys-C Mix (1:25, Promega). Magnetic beads were removed, and peptides were cleaned with High Protein and Peptide Recovery Detergent Removal Spin Columns, and Pierce Peptide Desalting Spin Columns (Thermo Fisher Scientific).

### ***Proteomics Analysis***

Samples were analysed using an Orbitrap Eclipse Tribrid Mass Spectrometer coupled with an Easy-nLC 1200 liquid chromatography system (Thermo Fisher Scientific). Peptides were separated on a 35 cm x 75  $\mu$ m in-house packed analytical column (particle size 3  $\mu$ m, Repronil-Pur C18, Dr. Maisch) using a 55-minute stepped gradient from 5% to 80% acetonitrile in 0.2% formic acid at 300 nL/min. Precursor ion mass spectra were acquired at 120,000 resolution. Abundant precursors or those from an inclusion list ( $m/z$  743.14 and 990.51 Da, and 25 ppm mass tolerance) were isolated with an  $m/z$  window of 1.4 and fragmented by higher-energy collisional dissociation (HCD) at 30%. Fragment spectra were recorded at 30,000 resolution.

### ***Database Search***

Raw files were analysed with Proteome Discoverer (version 3.0, Thermo Fisher Scientific). The data was matched against BTK sequence (Q06187) retrieved from SwissProt database using Sequest HT (v1.17) with a precursor tolerance of 7 ppm and fragment ion tolerance of 0.02 Da. Tryptic peptides with 1 missed cleavage were accepted. Methionine oxidation (M), deamidation of asparagine and glutamine (N, Q), cysteine carbamidomethylation (C), and cysteine probe adduct (441.22734 Da, C) were set as variable modifications. Fragments with H<sub>2</sub>O or NH<sub>3</sub> loss were included in the search. Fragment spectra were manually inspected to verify correct matching. A detailed list of all the identified peptides can be found in the supporting information file.

## **Biochemical Assays**

### ***In-Gel Fluorescence Labelling of Recombinant BTK***

For covalent binding tests of **Evo-1** and **Evo-2** to BTK, 100 ng (1  $\mu$ L) of full-length recombinant BTK (#V2941, Promega) was combined with 1  $\mu$ L of **Evo-1** or **Evo-2** (4  $\mu$ M to 62.5 nM) and 18  $\mu$ L PBS, incubated for 1 h at room temperature. Samples were mixed with 4x LDS sample buffer (Thermo Fisher Scientific #NP0007), and reducing agent (NuPAGE sample reducing agent, Thermo Fisher Scientific, #NP0009), and the proteins were separated by electrophoresis on 4-12% NuPAGE Bis-Tris gels (Thermo Fisher Scientific, #NP0321). A ChemiDoc Imager (Bio-Rad, Alexa 488 filter) was used for fluorescence detection.

### ***ADP-Glo Assay-Determination of IC<sub>50</sub> Values***

The ADP-Glo Kinase Assay (Promega) was performed using the supplied protocol with full-length recombinant BTK (MRC PPU Reagents, University of Dundee, UK, #DU12110). All procedures were at room temperature, with dilutions in Tris buffer (40 mM Tris-HCl, 20 mM MgCl<sub>2</sub>, 2 mM MnCl<sub>2</sub>, 0.1 mg/mL BSA, 50  $\mu$ M DTT, pH 7.5). The kinase reaction quadruplicates, (5  $\mu$ L reaction volume) were carried out in a 384-well White Polystyrene Microplate (Corning model 3824) with 10 ng of BTK, 50  $\mu$ M ATP, 0.2  $\mu$ g/ $\mu$ L Poly(Glu<sub>4</sub>Tyr<sub>1</sub>), and test compounds (0-1000  $\mu$ M). Final DMSO concentration was 1%. After pre-incubation (1  $\mu$ L compound, 2  $\mu$ L BTK solution for 30 min), 2  $\mu$ L substrate solution was added. The reaction was incubated for 60 min, followed by 5  $\mu$ L ADP-Glo Reagent, and another 40 min incubation. Kinase Detection Reagent (10  $\mu$ L) was added, and the solution was incubated for 60 min. Luminescence was measured on a SpectraMax iD5 Microplate Reader (Molecular Devices) using 1000 ms integration time. Luminescence values were converted to % activity, normalized to the positive control, and plotted using non-linear regression of the Sigmoidal dose-response curve. The IC<sub>50</sub> values were determined and shown as mean  $\pm$  SD.

### ***ADP-Glo Assay-ATP Competition Experiment***

To determine ATP-binding interference by **Evo-1** and **Evo-2**, BTK reactions were performed in triplicates (5  $\mu$ L volume, 10 ng/ $\mu$ L BTK, 500 nM test compounds, 0-200  $\mu$ M ATP, 0.2  $\mu$ g/ $\mu$ L Poly(Glu<sub>4</sub>Tyr<sub>1</sub>, 1% DMSO). After 60 min incubation, the ADP-Glo procedure was performed as described above. Relative luminescence values (mean  $\pm$  SD, after subtracting the negative control) were plotted versus the ATP concentrations for each compound.

## **Cellular Assays and Confocal Microscopy**

### **Cell Lines**

Ramos B-cells, and Jurkat T- cells (Clone E6-1) were purchased from the American Type Culture Collection (ATCC). Cells were maintained in Iscove's Modified Dulbecco's Medium with 25 mM HEPES (IMDM1x Glutamax, Gibco), supplemented with 10% heat-inactivated fetal bovine serum (FBS, Gibco), penicillin (100 U/mL), streptomycin (100  $\mu$ g/mL) (HyClone Cytiva), and 50  $\mu$ M  $\beta$ -mercaptoethanol (Gibco). Cells were grown at 37°C in a humidified 5%

CO<sub>2</sub> atmosphere, and tested for mycoplasma contamination (MycoplasmaCheck test, Eurofins Genomics, Germany).

### **Flow Cytometry**

Ramos and Jurkat cells (500,000 cells/mL) were treated in a 96-well microplate with 0.1 % DMSO, 4  $\mu$ M compound **2**, **Evo-1**, or **Evo-2** (100 nM to 4  $\mu$ M) at 37°C in a 5% CO<sub>2</sub> atmosphere for 2 h ( $n = 3$ ). Cells were centrifuged (3 min, 300xg, 20°C), the supernatant was removed, and the cells were resuspended and washed twice with PBS. Cells for immediate acquisition were resuspended in 100  $\mu$ L PBS; those for washout were resuspended in 200  $\mu$ L fresh medium, incubated for 16 h (37°C, 5% CO<sub>2</sub>), and then washed twice with PBS and resuspended in 100  $\mu$ L PBS. Data was acquired using a FACSLyric flow cytometer ( $\lambda_{exc} = 488$  nm,  $\lambda_{em} = 527$  nm BD Biosciences), and analysed with FlowJo software (version 10, TreeStar Inc.).

### **In-Gel Fluorescence Detection of Cellular Proteins Labelled by the Probes**

Ramos and Jurkat cells (500,000 cells/mL) were treated for 2 h with 0.1% DMSO or 500 nM **Evo-1** and **Evo-2**. For the competition experiment, cells were pretreated with or without 5  $\mu$ M ibrutinib for 30 min followed by 2-h treatment with 0.1% DMSO or 500 nM **Evo-1**, and **Evo-2**. For the cellular labelling experiment with different concentrations of **Evo-2**, cells were treated with 0.1 % DMSO or **Evo-2**, (100 nM to 4  $\mu$ M). Cells were harvested, washed thrice with PBS, and lysed on ice for 30 min with 1x RIPA buffer (Cell Signalling, #9806) containing protease and phosphatase inhibitors (Halt Protease and Phosphatase Inhibitor Cocktail, Thermo Fisher Scientific #87785). Lysates were sonicated (3x30s), centrifuged (28,000xg, 10 min), and the protein concentration was determined using the BCA protein assay (Pierce BCA Protein Assay Kit, ThermoScientific, #23225). Samples (16-19  $\mu$ g total protein) were mixed with 4xLDS sample buffer and reducing agent, separated by electrophoresis on 4-12% NuPAGE Bis-Tris gels. Gels were scanned for BODIPY tag fluorescence (ChemiDoc Imager Bio-Rad, Alexa488 filter). After the fluorescence scanning, gels were stained for total proteins (Colloidal Blue Kit, Thermo Fisher Scientific, #LC6025).

### **Western Blot**

Proteins were transferred to nitrocellulose membranes (Bio-Rad) after electrophoresis. Membranes were blocked with 5% BSA in TBS-Tween (for phospho-BTK and BTK detection, and 3% BSA in TBS-Tween for  $\beta$ -actin detection). After blocking, the membranes were incubated overnight at 4°C with primary antibodies: rabbit anti-phospho-BTK (Tyr233) (Cell Signaling, #87141, 1:1000 in 5% milk/ TBS-Tween), mouse anti-BTK antibody (Cell Signalling, #56044, 1:1000 in 5% BSA/ TBS-Tween), and mouse anti- $\beta$ -actin (Abcam, #ab8226, 1:1000 in 3% BSA/ TBS-Tween). Membranes were washed twice with TBS-Tween, then incubated for

30 min at room temperature with secondary antibodies: goat anti-mouse Alexa633 (Invitrogen, #A21050) or HRP-conjugated antibodies (donkey anti-rabbit-HRP, Sigma #NA934V; sheep anti-mouse-HRP Sigma #NA931V, 1:5000 in 5% milk/ TBS-Tween). Fluorescence was detected using a ChemiDoc Imager (Alexa647 filter). Chemiluminescence signals were developed with Supersignal HRP substrate (Thermo Fisher Scientific, #23225) for phospho-BTK and BTK, and Immobilon forte HRP substrate (Millipore) for  $\beta$ -actin detection. Images were acquired with a digital camera (ChemiDoc, Bio-Rad). The membrane was stripped using Restore stripping buffer (Thermo Fisher Scientific, #21059) between detections.

### **Immunoprecipitation**

Ramos cells (500,000 cells/mL) were treated in 10 cm<sup>2</sup> dishes with either 0.1% DMSO or 4  $\mu$ M **Evo-2** for 4 h. Cells were harvested by centrifugation (5 min, 200xg, 4°C) washed thrice with ice-cold PBS, and lysed on ice for 30 min in 200  $\mu$ L lysis buffer (50 mM Tris-HCl, 150 mM NaCl, 1% NP-40, pH 7.4) containing protease and phosphatase inhibitors. Lysates were sonicated thrice for 30s, centrifuged (14,000xg, 10 min, 4°C), and protein concentrations were determined using the BCA assay. Samples were adjusted to the same concentration, and lysates were immunoprecipitated overnight at 4°C with rabbit anti-BTK antibodies (Abcam, #ab137503) or rabbit IgG isotype control, coupled to Dynabeads Protein G (Thermo Fisher Scientific #10004D). Immunoprecipitated samples were mixed with 4x LDS sample buffer and reducing agent, then separated by electrophoresis on 4-12% NuPAGE Bis-Tris gels. Gels were transferred to PVDF membranes, and fluorescence of **Evo-2** bound to BTK was detected using a ChemiDoc apparatus (Alexa488 filter). Membranes were then immunoblotted with mouse-anti-BTK and mouse anti- $\beta$ -actin antibodies, followed by sheep anti-mouse HRP antibodies to detect BTK and  $\beta$ -actin, as described in the Western blot section.

### **Cell Viability Assay**

Ramos cells (600,000 cells/mL) were treated with **Evo-1** and **Evo-2** at concentrations ranging from 0 to 10  $\mu$ M for 2 and 4 h respectively. Control wells with 0.1 % DMSO or no treatment were included. Post-treatment, 10  $\mu$ L of each cell sample was mixed with 10  $\mu$ L 0.4% Trypan blue (Logos Biosystems, #T13001), and cell viability was measured using a Luna-II automated cell counter (Logos Biosystems). Measurements were performed in triplicate. Percent cell viability was calculated as: %viability = (A/A')\*100, where A is mean cell viability for each concentration and A' mean cell viability of the DMSO control. Mean viability was averaged for each aliquot.

### **BTK Activity**



Ramos cells (500,000 cells/mL) were pre-treated with or without 5  $\mu$ M ibrutinib for 1 h at 37°C, and then treated with 500 nM **Evo-2** for 2 h. Cells were washed twice with PBS, resuspended in medium, and incubated with or without anti-human IgM (Jackson ImmunoResearch, #109-006-129, 10  $\mu$ g/mL) for 10 min at 37°C to stimulate BCR signalling. Cells were harvested, and immunoblots of phospho-BTK, total-BTK, and  $\beta$ -actin were performed as described in the Western blot section.

### **Cellular Uptake of Evo-2**

Ramos cells (500,000 cells/mL) were pelleted by centrifugation at 200xg for 5 min. Growth medium was replaced with Iscove's Modified Dulbecco's Medium without phenol red, supplemented with 10% FBS and 50  $\mu$ M  $\beta$ -mercaptoethanol. Cells were treated with 500 nM **Evo-2**, and images of cellular uptake were captured every second immediately after addition without washing. Imaging data were collected on a Zeiss LSM880 Airyscan using a 63x/1.2 oil Corr FCS M27 objective with excitation at 488 nm and BP495-550+LP620 filters. Conditions were maintained at 37°C and 5% CO<sub>2</sub>. Image processing used ZEN software (Zeiss), and analysis with ImageJ<sup>5</sup>.

### **Fluorescence Bioimaging Experiments**

Intracellular fluorescence and distribution of **Evo-2** within Ramos cells were analysed either using a Carl Zeiss LSM 880 Airyscan microscope with C-Apochromat 40x/1.2 W Corr FCS M27, or 63x/1.2 W Corr FCS M27, or 63x/1.2 oil Corr FCS M27 objectives. Cells were visualised upon excitation at 488 or 633 nm, using suitable filters (BP495-550+LP620 or BP420-480+LP605). Bright-field images were captured with a 405 nm laser. Conditions were maintained at 37°C and 5% CO<sub>2</sub>. Image processing used ZEN software, and analysis was performed with ImageJ<sup>5</sup>.

### **Immunostaining experiments**

Ramos cells (500,000 cells/mL) were treated for 2 h with 0.1% DMSO or 1  $\mu$ M **Evo-2** at 37°C, 5% CO<sub>2</sub>. Cells were harvested, washed twice with PBS, resuspended in PBS (1x10<sup>6</sup> cells/mL), and transferred to 12-well plates with coverslips. Cells adhered by sedimentation for 30 min at room temperature, fixed with 4% paraformaldehyde in PBS for 10 min, washed twice with PBS and permeabilized with 0.1% Triton X with 6  $\mu$ g/mL goat IgG in blocking buffer (5% fish gelatine in PBS) for 1 h at room temperature. Cells were incubated with primary antibodies (anti-mouse BTK, Cell Signalling, #56044, 1:50 in 0.1% Triton X with 6  $\mu$ g/mL goat IgG in blocking buffer; anti-mouse IgG2b isotype control, Abcam, #ab170192, 1:1000 in same buffer) for 1 h at room temperature. Thereafter, cells were washed thrice with PBS and incubated with goat anti-mouse Alexa 633 secondary antibody (Thermo Fisher Scientific, #A21050) for 1 h at room temperature. Cells were washed thrice with PBS, once with water,

and mounted on slides (Superfrost ThermoScientific, #AGAA000080#32) with ProLong Gold (Invitrogen, #P36930). Imaging data were collected on a Zeiss LSM880 microscope using a 63x/1.2 W Corr FCS M27 objective. Image processing used ZEN software, and co-localisation analysis with ImageJ<sup>5</sup> using JACoP toolbox<sup>6</sup>.

### **Degradation of Evo-2-labelled BTK**

Ramos cells (420,000 cells/mL) were treated for 2 h with 0.1% DMSO or 1  $\mu$ M Evo-2 at 37°C, 5% CO<sub>2</sub>. Cells were harvested, washed twice with PBS, resuspended in medium and treated with 10 nM PROTAC **NX-5948** for 0, 30 and 120 min at 37°C, 5% CO<sub>2</sub>. Cells were harvested, and immunoblots of total-BTK, and  $\beta$ -actin were performed as described in the Western blot section.

For the bio-imaging experiments with PROTAC **NX-5948**, Ramos cells were treated with **Evo-2** were attached to the bottom of imaging dishes (Ibidi, #81158) using a Cell-Tak adhesive mixture (Corning, #354240). It was prepared with a mixture of sodium bicarbonate (75 g/L), sodium hydroxide (40 g/L) and Cell-Tak (2.03 g/L) at a volume ratio of 291:5:4. For each well, 500  $\mu$ L of Cell-Tak mix was added and incubated at room temperature for 30 min. The Cell-Tak mix was then removed, the dishes were washed twice with H<sub>2</sub>O and completely dried off. Next, Ramos cells suspended in PBS and previously treated with either **Evo-2** or 0.1% DMSO, were added to the wells. Plated cells were incubated at 37°C, 5% CO<sub>2</sub> for 45 min and unadhered cells were carefully removed. Cells were then treated with 50 nM LysoTracker DeepRed (Invitrogen, #L12492) for 30 min at 37°C, 5% CO<sub>2</sub>, and after washing once with PBS, media was changed to pre-warmed IMDM no phenol red (Glutamax, Gibco) supplemented with 10% heat-inactivated FBS. Then, 10 nM PROTAC **NX-5948** was added to the plated cells and cells were imaged at 0.5, 1 and 2 h of treatment with PROTAC. Cells were imaged using a Carl Zeiss LSM 980 confocal microscope equipped with a 63x/1.4 oil DIC M27 objective. Cells were visualised upon excitation at 488 nm and 639 nm by using a 32-channel GaAsP PMT Detector in the green spectral range (464-517 nm) and a PMT Multialkaline Detector centered in the red region (647-700 nm). Bright-field images were captured with a halogen lamp. Conditions were maintained at 37°C and 5% CO<sub>2</sub>. Image processing used ZEN software, and analysis was performed with ImageJ<sup>5</sup>.

## Supplementary Figures and Tables

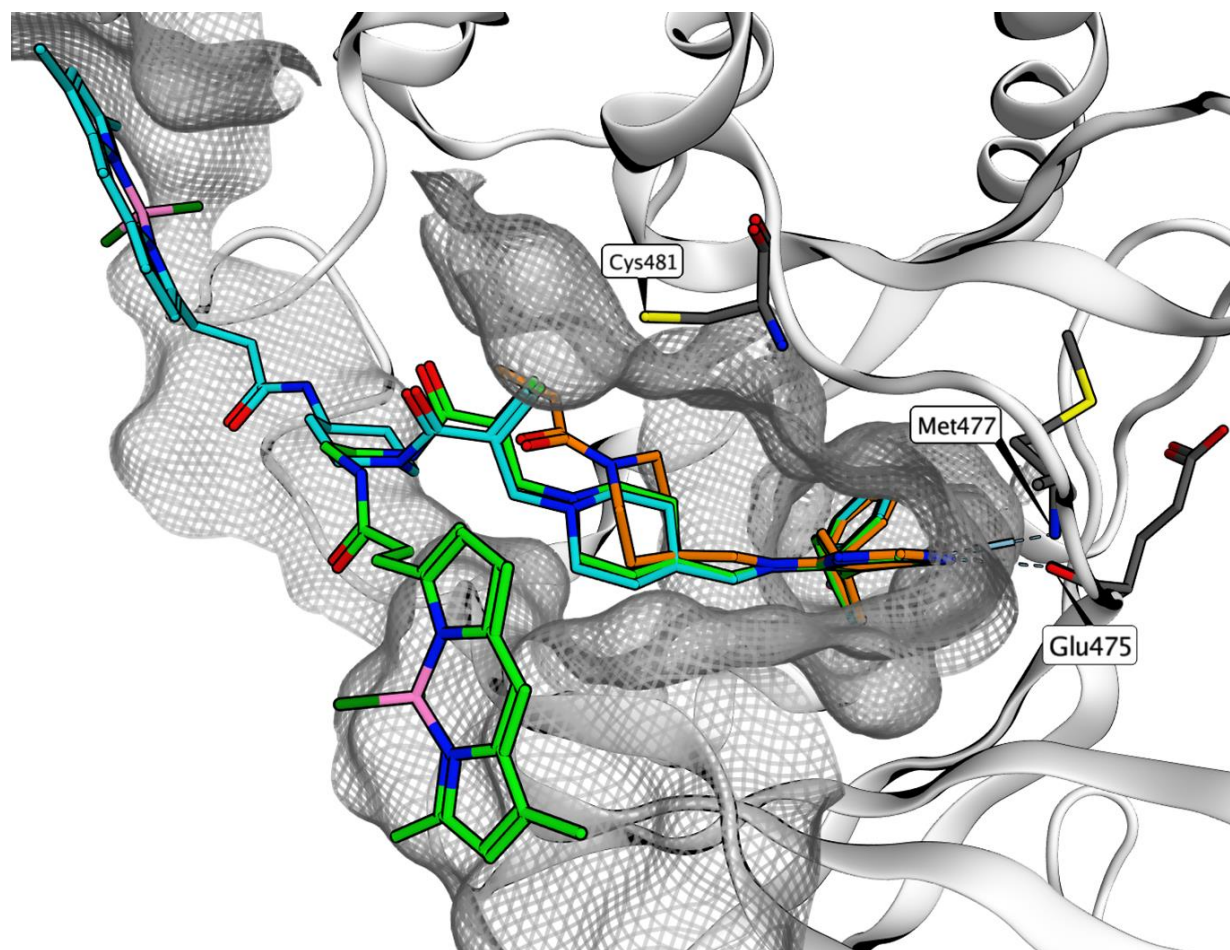

**Figure S1.** Molecular docking structures of **Evo-1** (light green carbons) and **Evo-2** (cyan carbons) bound to the kinase domain of BTK superimposed on the crystal structure of evobrutinib (orange carbons, PDB ID: 6OMU). A 4.5 Å molecular surface of all BTK residues near the ligands is shown. The interactions between the aminopyrimidine ring and the hinge region are illustrated with dashed lines.

**Table S1 | Optimisation of the Suzuki-Miyaura reaction<sup>a</sup>**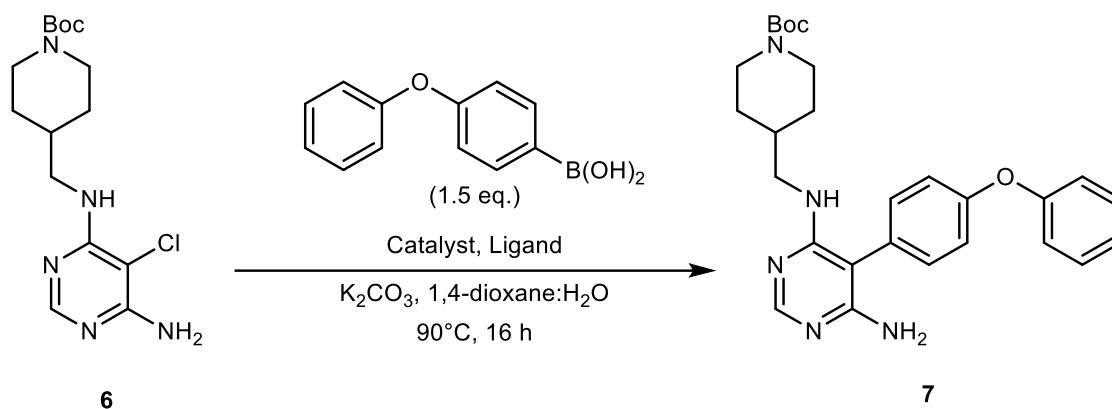

| Entry          | Catalyst                          | Ligand             | K <sub>2</sub> CO <sub>3</sub> (eq.) | 1,4-dioxane:H <sub>2</sub> O | Yield (%) <sup>b</sup> |
|----------------|-----------------------------------|--------------------|--------------------------------------|------------------------------|------------------------|
| 1 <sup>c</sup> | Pd(OAc) <sub>2</sub><br>(10 mol%) | SPhos<br>(0.1 eq.) | 3                                    | 9:1                          | 28                     |
| 2              | Pd(OAc) <sub>2</sub><br>(10 mol%) | XPhos<br>(0.1 eq.) | 2                                    | 2:1                          | 29                     |
| 3              | PEPPSI-IPr<br>(5 mol%)            | -                  | 2                                    | 2:1                          | 41                     |
| 4              | XPhos Pd G2<br>(5 mol%)           | -                  | 2                                    | 2:1                          | 55                     |
| 5              | SPhos Pd G3<br>(5 mol%)           | -                  | 2                                    | 2:1                          | 55                     |
| 6 <sup>d</sup> | SPhos Pd G3<br>(5 mol%)           | -                  | 2                                    | 4:1                          | 67                     |
| 7 <sup>e</sup> | SPhos Pd G4<br>(2.5 mol%)         | -                  | 2                                    | 4:1                          | 76                     |

<sup>a</sup> Reactions were conducted at 0.4 mmol scale. <sup>b</sup> Isolated yields. <sup>c</sup> Reaction was run in the microwave reactor at 150°C for 2 h. <sup>d</sup> Reaction run for 2 h. <sup>e</sup> Reaction conditions were performed at 1.5 mmol scale.

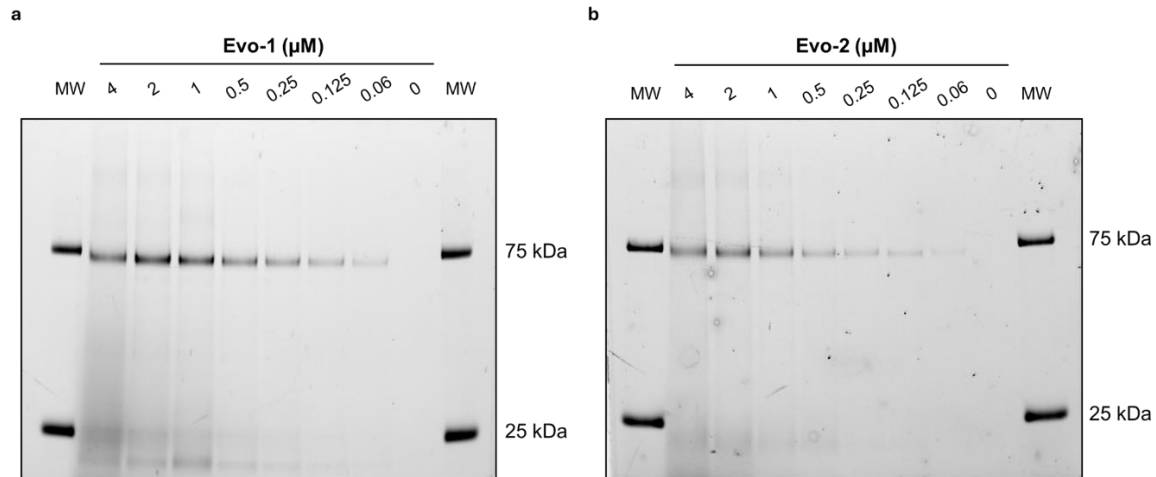

**Figure S2.** **a** In-gel fluorescence scanning of dose-dependent labelling of BTK by **Evo-1**. **b** In-gel fluorescence scanning of dose-dependent labelling of BTK by **Evo-2**. In both cases, recombinant BTK (0.1 μg) was incubated with decreasing concentrations of **Evo-1** and **Evo-2** for 1 h and then imaged with ChemiDoc apparatus (Alexa488 filter). The molecular weight (MW) of the fluorescent markers 75 and 25 kDa are shown on the far left and right of the gels.

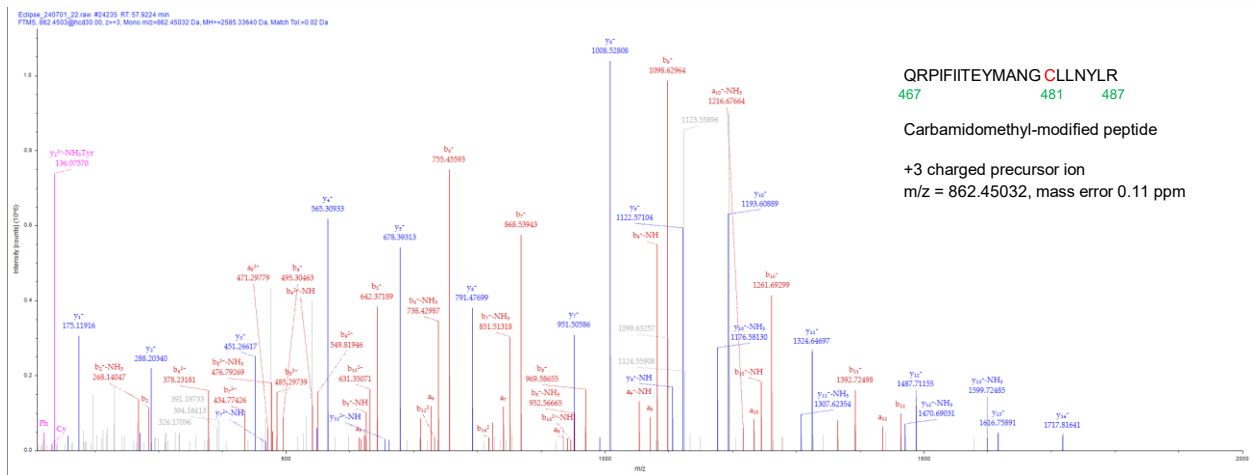

**Figure S3.** MS/MS-spectrum of the +3 charged precursor ion of the carbamidomethyl-modified peptide (467-487), resulting from BTK incubation with DMSO. Peaks are coloured as follows: y-ions in blue, a- and b-ions in red, immonium ions in magenta, and other ions in grey. The fragment ions that matched in the database search are highlighted in **Tables S2** and **S3**.

**Table S2 | Fragments matched for carbamidomethyl-modified peptide (+3 charged precursor ion)<sup>a</sup>**

| #1 | a <sup>+</sup> | a <sup>2+</sup> | b <sup>+</sup> | b <sup>2+</sup> | Immonium | Seq. uence  | y <sup>+</sup> | y <sup>2+</sup> | #2 |
|----|----------------|-----------------|----------------|-----------------|----------|-------------|----------------|-----------------|----|
| 1  | 101.0709       | 51.0391         | 129.0659       | 65.0366         | 101.0709 | Q           |                |                 | 21 |
| 2  | 257.1721       | 129.0897        | 285.1670       | 143.0871        | 129.1135 | R           | 2457.278<br>1  | 1229.1427       | 20 |
| 3  | 354.2248       | 177.6161        | 382.2197       | 191.6135        | 70.0651  | P           | 2301.177<br>0  | 1151.0921       | 19 |
| 4  | 467.3089       | 234.1581        | 495.3038       | 248.1555        | 86.0964  | I           | 2204.124<br>2  | 1102.5658       | 18 |
| 5  | 614.3773       | 307.6923        | 642.3722       | 321.6897        | 120.0808 | F           | 2091.040<br>2  | 1046.0237       | 17 |
| 6  | 727.4614       | 364.2343        | 755.4563       | 378.2318        | 86.0964  | I           | 1943.971<br>8  | 972.4895        | 16 |
| 7  | 840.5454       | 420.7764        | 868.5403       | 434.7738        | 86.0964  | I           | 1830.887<br>7  | 915.9475        | 15 |
| 8  | 941.5931       | 471.3002        | 969.5880       | 485.2976        | 74.0600  | T           | 1717.803<br>6  | 859.4055        | 14 |
| 9  | 1070.6357      | 535.8215        | 1098.630<br>6  | 549.8189        | 102.0550 | E           | 1616.756<br>0  | 808.8816        | 13 |
| 10 | 1233.6990      | 617.3532        | 1261.693<br>9  | 631.3506        | 136.0757 | Y           | 1487.713<br>4  | 744.3603        | 12 |
| 11 | 1364.7395      | 682.8734        | 1392.734<br>4  | 696.8709        | 104.0529 | M           | 1324.650<br>0  | 662.8287        | 11 |
| 12 | 1435.7766      | 718.3920        | 1463.771<br>5  | 732.3894        | 44.0495  | A           | 1193.609<br>6  | 597.3084        | 10 |
| 13 | 1549.8196      | 775.4134        | 1577.814<br>5  | 789.4109        | 87.0553  | N           | 1122.572<br>4  | 561.7899        | 9  |
| 14 | 1606.8410      | 803.9241        | 1634.835<br>9  | 817.9216        | 30.0338  | G           | 1008.529<br>5  | 504.7684        | 8  |
| 15 | 1766.8717      | 883.9395        | 1794.866<br>6  | 897.9369        | 133.0430 | C-Alkylated | 951.5081       | 476.2577        | 7  |
| 16 | 1879.9557      | 940.4815        | 1907.950<br>6  | 954.4790        | 86.0964  | L           | 791.4774       | 396.2423        | 6  |
| 17 | 1993.0398      | 997.0235        | 2021.034<br>7  | 1011.021<br>0   | 86.0964  | L           | 678.3933       | 339.7003        | 5  |
| 18 | 2107.0827      | 1054.045<br>0   | 2135.077<br>6  | 1068.042<br>5   | 87.0553  | N           | 565.3093       | 283.1583        | 4  |
| 19 | 2270.1460      | 1135.576<br>7   | 2298.141<br>0  | 1149.574<br>1   | 136.0757 | Y           | 451.2663       | 226.1368        | 3  |
| 20 | 2383.2301      | 1192.118<br>7   | 2411.225<br>0  | 1206.116<br>2   | 86.0964  | L           | 288.2030       | 144.6052        | 2  |
| 21 |                |                 |                |                 | 129.1135 | R           | 175.1190       | 88.0631         | 1  |

<sup>a</sup>The table shows calculated masses for a-, b-, y-, and immonium ions. The fragment ions detected in the MS/MS spectra that matched in the database search are highlighted in colour.

**Table S3 | Fragments matched for carbamidomethyl-modified peptide (+3 charged precursor ion)<sup>a</sup>**

| #1 | a-NH <sub>3</sub> <sup>+</sup> | a-NH <sub>3</sub> <sup>2+</sup> | b-NH <sub>3</sub> <sup>+</sup> | b-NH <sub>3</sub> <sup>2+</sup> | Seq. uence  | y-NH <sub>3</sub> <sup>+</sup> | y-NH <sub>3</sub> <sup>2+</sup> | #2 |
|----|--------------------------------|---------------------------------|--------------------------------|---------------------------------|-------------|--------------------------------|---------------------------------|----|
| 1  | 84.0444                        | 42.5258                         | 112.0393                       | 56.5233                         | Q           |                                |                                 | 21 |
| 2  | 240.1455                       | 120.5764                        | 268.1404                       | 134.5739                        | R           | 2440.251<br>6                  | 1220.6294                       | 20 |
| 3  | 337.1983                       | 169.1028                        | 365.1932                       | 183.1002                        | P           | 2284.150<br>5                  | 1142.5789                       | 19 |
| 4  | 450.2823                       | 225.6448                        | 478.2772                       | 239.6423                        | I           | 2187.097<br>7                  | 1094.0525                       | 18 |
| 5  | 597.3507                       | 299.1790                        | 625.3457                       | 313.1765                        | F           | 2074.013<br>6                  | 1037.5105                       | 17 |
| 6  | 710.4348                       | 355.7210                        | 738.4297                       | 369.7185                        | I           | 1926.945<br>2                  | 963.9763                        | 16 |
| 7  | 823.5189                       | 412.2631                        | 851.5138                       | 426.2605                        | I           | 1813.861<br>2                  | 907.4342                        | 15 |
| 8  | 924.5666                       | 462.7869                        | 952.5615                       | 476.7844                        | T           | 1700.777<br>1                  | 850.8922                        | 14 |
| 9  | 1053.6091                      | 527.3082                        | 1081.604<br>1                  | 541.3057                        | E           | 1599.729<br>4                  | 800.3683                        | 13 |
| 10 | 1216.6725                      | 608.8399                        | 1244.667<br>4                  | 622.8373                        | Y           | 1470.686<br>8                  | 735.8471                        | 12 |
| 11 | 1347.7130                      | 674.3601                        | 1375.707<br>9                  | 688.3576                        | M           | 1307.623<br>5                  | 654.3154                        | 11 |
| 12 | 1418.7501                      | 709.8787                        | 1446.745<br>0                  | 723.8761                        | A           | 1176.583<br>0                  | 588.7951                        | 10 |
| 13 | 1532.7930                      | 766.9001                        | 1560.787<br>9                  | 780.8976                        | N           | 1105.545<br>9                  | 553.2766                        | 9  |
| 14 | 1589.8145                      | 795.4109                        | 1617.809<br>4                  | 809.4083                        | G           | 991.5030                       | 496.2551                        | 8  |
| 15 | 1749.8451                      | 875.4262                        | 1777.840<br>0                  | 889.4237                        | C-Alkylated | 934.4815                       | 467.7444                        | 7  |
| 16 | 1862.9292                      | 931.9682                        | 1890.924<br>1                  | 945.9657                        | L           | 774.4509                       | 387.7291                        | 6  |
| 17 | 1976.0132                      | 988.5103                        | 2004.008<br>2                  | 1002.507<br>7                   | L           | 661.3668                       | 331.1870                        | 5  |
| 18 | 2090.0562                      | 1045.531<br>7                   | 2118.051<br>1                  | 1059.529<br>2                   | N           | 548.2827                       | 274.6450                        | 4  |
| 19 | 2253.1195                      | 1127.063<br>4                   | 2281.114<br>4                  | 1141.060<br>8                   | Y           | 434.2398                       | 217.6235                        | 3  |
| 20 | 2366.2036                      | 1183.605<br>4                   | 2394.198<br>5                  | 1197.602<br>9                   | L           | 271.1765                       | 136.0919                        | 2  |
| 21 |                                |                                 |                                |                                 | R           | 158.0924                       | 79.5498                         | 1  |

<sup>a</sup>The table shows calculated masses for a-, b-, and y-ions with loss of NH<sub>3</sub>. The fragment ions detected in the MS/MS spectra that matched in the database search are highlighted in colour.

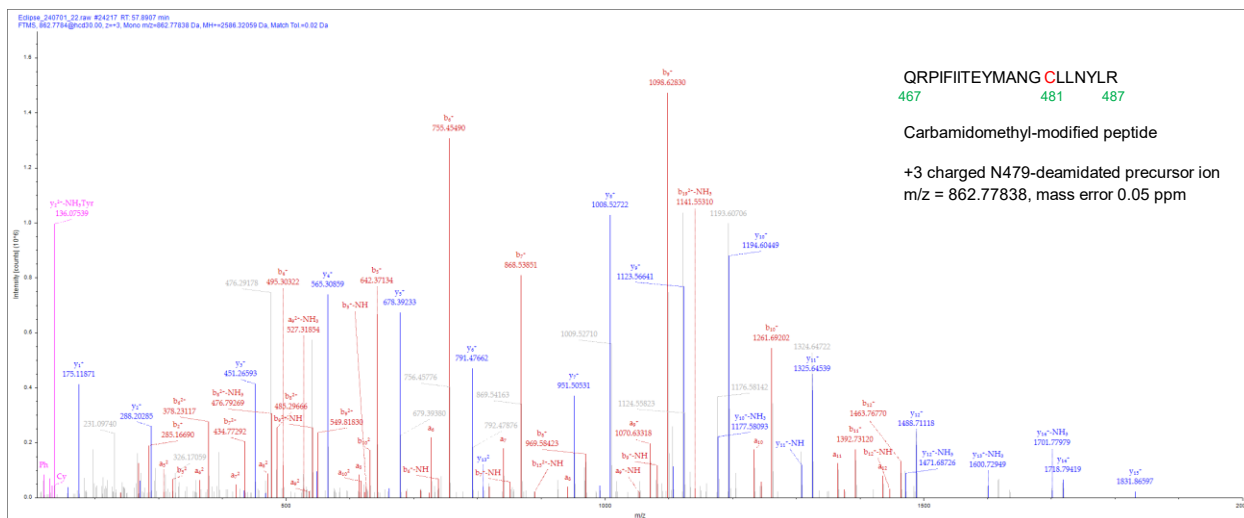

**Figure S4.** MS/MS-spectrum of the +3 charged N479-deamidated precursor ion of the carbamidomethyl-modified peptide (467-487), resulting from BTK incubation with DMSO. Peaks are coloured as follows: y-ions in blue, a- and b-ions in red, immonium ions in magenta, and other ions in grey. The fragment ions that matched in the database search are highlighted in **Tables S4** and **S5**.



**Table S4 | Fragments matched for carbamidomethyl-modified peptide (+3 charged N-deamidated precursor ion)<sup>a</sup>**

| #1 | a <sup>+</sup> | a <sup>2+</sup> | b <sup>+</sup> | b <sup>2+</sup> | Immonium | Seq. uence   | y <sup>+</sup> | y <sup>2+</sup> | #2 |
|----|----------------|-----------------|----------------|-----------------|----------|--------------|----------------|-----------------|----|
| 1  | 101.0709       | 51.0391         | 129.0659       | 65.0366         | 101.0709 | Q            |                |                 | 21 |
| 2  | 257.1721       | 129.0897        | 285.1670       | 143.0871        | 129.1135 | R            | 2458.262<br>1  | 1229.6347       | 20 |
| 3  | 354.2248       | 177.6161        | 382.2197       | 191.6135        | 70.0651  | P            | 2302.161<br>0  | 1151.5842       | 19 |
| 4  | 467.3089       | 234.1581        | 495.3038       | 248.1555        | 86.0964  | I            | 2205.108<br>3  | 1103.0578       | 18 |
| 5  | 614.3773       | 307.6923        | 642.3722       | 321.6897        | 120.0808 | F            | 2092.024<br>2  | 1046.5157       | 17 |
| 6  | 727.4614       | 364.2343        | 755.4563       | 378.2318        | 86.0964  | I            | 1944.955<br>8  | 972.9815        | 16 |
| 7  | 840.5454       | 420.7764        | 868.5403       | 434.7738        | 86.0964  | I            | 1831.871<br>7  | 916.4395        | 15 |
| 8  | 941.5931       | 471.3002        | 969.5880       | 485.2976        | 74.0600  | T            | 1718.787<br>7  | 859.8975        | 14 |
| 9  | 1070.6357      | 535.8215        | 1098.630<br>6  | 549.8189        | 102.0550 | E            | 1617.740<br>0  | 809.3736        | 13 |
| 10 | 1233.6990      | 617.3532        | 1261.693<br>9  | 631.3506        | 136.0757 | Y            | 1488.697<br>4  | 744.8523        | 12 |
| 11 | 1364.7395      | 682.8734        | 1392.734<br>4  | 696.8709        | 104.0529 | M            | 1325.634<br>1  | 663.3207        | 11 |
| 12 | 1435.7766      | 718.3920        | 1463.771<br>5  | 732.3894        | 44.0495  | A            | 1194.593<br>6  | 597.8004        | 10 |
| 13 | 1550.8036      | 775.9054        | 1578.798<br>5  | 789.9029        | 88.0393  | N-Deamidated | 1123.556<br>5  | 562.2819        | 9  |
| 14 | 1607.8250      | 804.4162        | 1635.819<br>9  | 818.4136        | 30.0338  | G            | 1008.529<br>5  | 504.7684        | 8  |
| 15 | 1767.8557      | 884.4315        | 1795.850<br>6  | 898.4289        | 133.0430 | C-Alkylated  | 951.5081       | 476.2577        | 7  |
| 16 | 1880.9397      | 940.9735        | 1908.934<br>7  | 954.9710        | 86.0964  | L            | 791.4774       | 396.2423        | 6  |
| 17 | 1994.0238      | 997.5155        | 2022.018<br>7  | 1011.513<br>0   | 86.0964  | L            | 678.3933       | 339.7003        | 5  |
| 18 | 2108.0667      | 1054.537<br>0   | 2136.061<br>6  | 1068.534<br>5   | 87.0553  | N            | 565.3093       | 283.1583        | 4  |
| 19 | 2271.1301      | 1136.068<br>7   | 2299.125<br>0  | 1150.066<br>1   | 136.0757 | Y            | 451.2663       | 226.1368        | 3  |
| 20 | 2384.2141      | 1192.610<br>7   | 2412.209<br>0  | 1206.608<br>2   | 86.0964  | L            | 288.2030       | 144.6052        | 2  |
| 21 |                |                 |                |                 | 129.1135 | R            | 175.1190       | 88.0631         | 1  |

<sup>a</sup>The table shows calculated masses for a-, b-, y-, and immonium ions. The fragment ions detected in the MS/MS spectra that matched in the database search are highlighted in colour.

**Table S5 | Fragments matched for carbamidomethyl-modified peptide (+3 charged N-deamidated precursor ion)<sup>a</sup>**

| #1 | a-NH <sub>3</sub> <sup>+</sup> | a-NH <sub>3</sub> <sup>2+</sup> | b-NH <sub>3</sub> <sup>+</sup> | b-NH <sub>3</sub> <sup>2+</sup> | Seq. uence   | y-NH <sub>3</sub> <sup>+</sup> | y-NH <sub>3</sub> <sup>2+</sup> | #2 |
|----|--------------------------------|---------------------------------|--------------------------------|---------------------------------|--------------|--------------------------------|---------------------------------|----|
| 1  | 84.0444                        | 42.5258                         | 112.0393                       | 56.5233                         | Q            |                                |                                 | 21 |
| 2  | 240.1455                       | 120.5764                        | 268.1404                       | 134.5739                        | R            | 2441.235<br>6                  | 1221.1214                       | 20 |
| 3  | 337.1983                       | 169.1028                        | 365.1932                       | 183.1002                        | P            | 2285.134<br>5                  | 1143.0709                       | 19 |
| 4  | 450.2823                       | 225.6448                        | 478.2772                       | 239.6423                        | I            | 2188.081<br>7                  | 1094.5445                       | 18 |
| 5  | 597.3507                       | 299.1790                        | 625.3457                       | 313.1765                        | F            | 2074.997<br>7                  | 1038.0025                       | 17 |
| 6  | 710.4348                       | 355.7210                        | 738.4297                       | 369.7185                        | I            | 1927.929<br>2                  | 964.4683                        | 16 |
| 7  | 823.5189                       | 412.2631                        | 851.5138                       | 426.2605                        | I            | 1814.845<br>2                  | 907.9262                        | 15 |
| 8  | 924.5666                       | 462.7869                        | 952.5615                       | 476.7844                        | T            | 1701.761<br>1                  | 851.3842                        | 14 |
| 9  | 1053.6091                      | 527.3082                        | 1081.604<br>1                  | 541.3057                        | E            | 1600.713<br>4                  | 800.8604                        | 13 |
| 10 | 1216.6725                      | 608.8399                        | 1244.667<br>4                  | 622.8373                        | Y            | 1471.670<br>8                  | 736.3391                        | 12 |
| 11 | 1347.7130                      | 674.3601                        | 1375.707<br>9                  | 688.3576                        | M            | 1308.607<br>5                  | 654.8074                        | 11 |
| 12 | 1418.7501                      | 709.8787                        | 1446.745<br>0                  | 723.8761                        | A            | 1177.567<br>0                  | 589.2872                        | 10 |
| 13 | 1533.7770                      | 767.3921                        | 1561.771<br>9                  | 781.3896                        | N-Deamidated | 1106.529<br>9                  | 553.7686                        | 9  |
| 14 | 1590.7985                      | 795.9029                        | 1618.793<br>4                  | 809.9003                        | G            | 991.5030                       | 496.2551                        | 8  |
| 15 | 1750.8291                      | 875.9182                        | 1778.824<br>0                  | 889.9157                        | C-Alkylated  | 934.4815                       | 467.7444                        | 7  |
| 16 | 1863.9132                      | 932.4602                        | 1891.908<br>1                  | 946.4577                        | L            | 774.4509                       | 387.7291                        | 6  |
| 17 | 1976.9973                      | 989.0023                        | 2004.992<br>2                  | 1002.999<br>7                   | L            | 661.3668                       | 331.1870                        | 5  |
| 18 | 2091.0402                      | 1046.023<br>7                   | 2119.035<br>1                  | 1060.021<br>2                   | N            | 548.2827                       | 274.6450                        | 4  |
| 19 | 2254.1035                      | 1127.555<br>4                   | 2282.098<br>4                  | 1141.552<br>9                   | Y            | 434.2398                       | 217.6235                        | 3  |
| 20 | 2367.1876                      | 1184.097<br>4                   | 2395.182<br>5                  | 1198.094<br>9                   | L            | 271.1765                       | 136.0919                        | 2  |
| 21 |                                |                                 |                                |                                 | R            | 158.0924                       | 79.5498                         | 1  |

<sup>a</sup>The table shows calculated masses for a-, b-, and y-ions with loss of NH<sub>3</sub>. The fragment ions detected in the MS/MS spectra that matched in the database search are highlighted in colour.

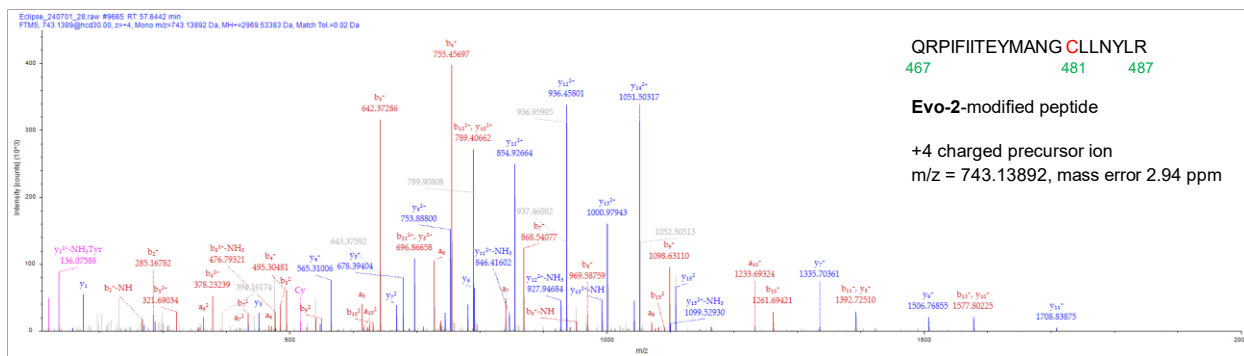

**Figure S5.** MS/MS-spectrum of the +4 charged precursor ion of the **Evo-2**-modified peptide (467-487), resulting from BTK incubation with **Evo-2**. Peaks are coloured as follows: y-ions in blue, a- and b-ions in red, immonium ions in magenta, and other ions in grey. The fragment ions that matched in the database search are highlighted in **Tables S6** and **S7**.

**Table S6 | Fragments matched for Evo-2-modified peptide (+4 charged precursor ion)<sup>a</sup>**

| #1 | a <sup>+</sup> | a <sup>2+</sup> | b <sup>+</sup> | b <sup>2+</sup> | Immonium | Seq. uence | y <sup>+</sup> | y <sup>2+</sup> | #2 |
|----|----------------|-----------------|----------------|-----------------|----------|------------|----------------|-----------------|----|
| 1  | 101.0709       | 51.0391         | 129.0659       | 65.0366         | 101.0709 | Q          |                |                 | 21 |
| 2  | 257.1721       | 129.0897        | 285.1670       | 143.0871        | 129.1135 | R          | 2841.484<br>0  | 1421.2456       | 20 |
| 3  | 354.2248       | 177.6161        | 382.2197       | 191.6135        | 70.0651  | P          | 2685.382<br>9  | 1343.1951       | 19 |
| 4  | 467.3089       | 234.1581        | 495.3038       | 248.1555        | 86.0964  | I          | 2588.330<br>1  | 1294.6687       | 18 |
| 5  | 614.3773       | 307.6923        | 642.3722       | 321.6897        | 120.0808 | F          | 2475.246<br>1  | 1238.1267       | 17 |
| 6  | 727.4614       | 364.2343        | 755.4563       | 378.2318        | 86.0964  | I          | 2328.177<br>6  | 1164.5925       | 16 |
| 7  | 840.5454       | 420.7764        | 868.5403       | 434.7738        | 86.0964  | I          | 2215.093<br>6  | 1108.0504       | 15 |
| 8  | 941.5931       | 471.3002        | 969.5880       | 485.2976        | 74.0600  | T          | 2102.009<br>5  | 1051.5084       | 14 |
| 9  | 1070.6357      | 535.8215        | 1098.630<br>6  | 549.8189        | 102.0550 | E          | 2000.961<br>8  | 1000.9846       | 13 |
| 10 | 1233.6990      | 617.3532        | 1261.693<br>9  | 631.3506        | 136.0757 | Y          | 1871.919<br>2  | 936.4633        | 12 |
| 11 | 1364.7395      | 682.8734        | 1392.734<br>4  | 696.8709        | 104.0529 | M          | 1708.855<br>9  | 854.9316        | 11 |
| 12 | 1435.7766      | 718.3920        | 1463.771<br>5  | 732.3894        | 44.0495  | A          | 1577.815<br>4  | 789.4114        | 10 |
| 13 | 1549.8196      | 775.4134        | 1577.814<br>5  | 789.4109        | 87.0553  | N          | 1506.778<br>3  | 753.8928        | 9  |
| 14 | 1606.8410      | 803.9241        | 1634.835<br>9  | 817.9216        | 30.0338  | G          | 1392.735<br>4  | 696.8713        | 8  |
| 15 | 2151.0775      | 1076.042<br>4   | 2179.072<br>5  | 1090.039<br>9   | 517.2489 | C-Labelled | 1335.713<br>9  | 668.3606        | 7  |
| 16 | 2264.1616      | 1132.584<br>4   | 2292.156<br>5  | 1146.581<br>9   | 86.0964  | L          | 791.4774       | 396.2423        | 6  |
| 17 | 2377.2457      | 1189.126<br>5   | 2405.240<br>6  | 1203.123<br>9   | 86.0964  | L          | 678.3933       | 339.7003        | 5  |
| 18 | 2491.2886      | 1246.147<br>9   | 2519.283<br>5  | 1260.145<br>4   | 87.0553  | N          | 565.3093       | 283.1583        | 4  |
| 19 | 2654.3519      | 1327.679<br>6   | 2682.346<br>8  | 1341.677<br>1   | 136.0757 | Y          | 451.2663       | 226.1368        | 3  |
| 20 | 2767.4360      | 1384.221<br>6   | 2795.430<br>9  | 1398.219<br>1   | 86.0964  | L          | 288.2030       | 144.6052        | 2  |
| 21 |                |                 |                |                 | 129.1135 | R          | 175.1190       | 88.0631         | 1  |

<sup>a</sup>The table shows calculated masses for a-, b-, y-, and immonium ions. The fragment ions detected in the MS/MS spectra that matched in the database search are highlighted in colour.

**Table S7 | Fragments matched for Evo-2-modified peptide (+4 charged precursor ion)<sup>a</sup>**

| #1 | a-NH <sub>3</sub> <sup>+</sup> | a-NH <sub>3</sub> <sup>2+</sup> | b-NH <sub>3</sub> <sup>+</sup> | b-NH <sub>3</sub> <sup>2+</sup> | Seq. uence | y-NH <sub>3</sub> <sup>+</sup> | y-NH <sub>3</sub> <sup>2+</sup> | #2 |
|----|--------------------------------|---------------------------------|--------------------------------|---------------------------------|------------|--------------------------------|---------------------------------|----|
| 1  | 84.0444                        | 42.5258                         | 112.0393                       | 56.5233                         | Q          |                                |                                 | 21 |
| 2  | 240.1455                       | 120.5764                        | 268.1404                       | 134.5739                        | R          | 2824.457<br>4                  | 1412.7324                       | 20 |
| 3  | 337.1983                       | 169.1028                        | 365.1932                       | 183.1002                        | P          | 2668.356<br>3                  | 1334.6818                       | 19 |
| 4  | 450.2823                       | 225.6448                        | 478.2772                       | 239.6423                        | I          | 2571.303<br>6                  | 1286.1554                       | 18 |
| 5  | 597.3507                       | 299.1790                        | 625.3457                       | 313.1765                        | F          | 2458.219<br>5                  | 1229.6134                       | 17 |
| 6  | 710.4348                       | 355.7210                        | 738.4297                       | 369.7185                        | I          | 2311.151<br>1                  | 1156.0792                       | 16 |
| 7  | 823.5189                       | 412.2631                        | 851.5138                       | 426.2605                        | I          | 2198.067<br>0                  | 1099.5372                       | 15 |
| 8  | 924.5666                       | 462.7869                        | 952.5615                       | 476.7844                        | T          | 2084.983<br>0                  | 1042.9951                       | 14 |
| 9  | 1053.6091                      | 527.3082                        | 1081.604<br>1                  | 541.3057                        | E          | 1983.935<br>3                  | 992.4713                        | 13 |
| 10 | 1216.6725                      | 608.8399                        | 1244.667<br>4                  | 622.8373                        | Y          | 1854.892<br>7                  | 927.9500                        | 12 |
| 11 | 1347.7130                      | 674.3601                        | 1375.707<br>9                  | 688.3576                        | M          | 1691.829<br>4                  | 846.4183                        | 11 |
| 12 | 1418.7501                      | 709.8787                        | 1446.745<br>0                  | 723.8761                        | A          | 1560.788<br>9                  | 780.8981                        | 10 |
| 13 | 1532.7930                      | 766.9001                        | 1560.787<br>9                  | 780.8976                        | N          | 1489.751<br>8                  | 745.3795                        | 9  |
| 14 | 1589.8145                      | 795.4109                        | 1617.809<br>4                  | 809.4083                        | G          | 1375.708<br>8                  | 688.3581                        | 8  |
| 15 | 2134.0510                      | 1067.529<br>1                   | 2162.045<br>9                  | 1081.526<br>6                   | C-Labelled | 1318.687<br>4                  | 659.8473                        | 7  |
| 16 | 2247.1351                      | 1124.071<br>2                   | 2275.130<br>0                  | 1138.068<br>6                   | L          | 774.4509                       | 387.7291                        | 6  |
| 17 | 2360.2191                      | 1180.613<br>2                   | 2388.214<br>0                  | 1194.610<br>7                   | L          | 661.3668                       | 331.1870                        | 5  |
| 18 | 2474.2620                      | 1237.634<br>7                   | 2502.257<br>0                  | 1251.632<br>1                   | N          | 548.2827                       | 274.6450                        | 4  |
| 19 | 2637.3254                      | 1319.166<br>3                   | 2665.320<br>3                  | 1333.163<br>8                   | Y          | 434.2398                       | 217.6235                        | 3  |
| 20 | 2750.4094                      | 1375.708<br>4                   | 2778.404<br>4                  | 1389.705<br>8                   | L          | 271.1765                       | 136.0919                        | 2  |
| 21 |                                |                                 |                                |                                 | R          | 158.0924                       | 79.5498                         | 1  |

<sup>a</sup>The table shows calculated masses for a-, b-, and y-ions with loss of NH<sub>3</sub>. The fragment ions detected in the MS/MS spectra that matched in the database search are highlighted in colour.

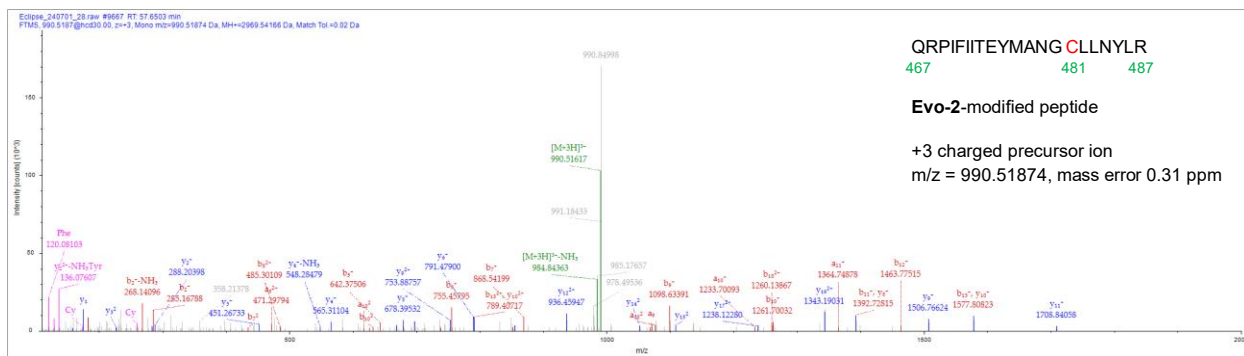

**Figure S6.** MS/MS-spectrum of the +3 charged precursor ion of the **Evo-2**-modified peptide (467-487), resulting from BTK incubation with **Evo-2**. Peaks are coloured as follows: y-ions in blue, a- and b-ions in red, immonium ions in magenta, precursor ions in green, and other ions in grey. The fragment ions that matched in the database search are highlighted in **Tables S8** and **S9**.

**Table S8 | Fragments matched for Evo-2-modified peptide (+3 charged precursor ion)<sup>a</sup>**

| #1 | a <sup>+</sup> | a <sup>2+</sup> | b <sup>+</sup> | b <sup>2+</sup> | Immonium | Seq. uence | y <sup>+</sup> | y <sup>2+</sup> | #2 |
|----|----------------|-----------------|----------------|-----------------|----------|------------|----------------|-----------------|----|
| 1  | 101.0709       | 51.0391         | 129.0659       | 65.0366         | 101.0709 | Q          |                |                 | 21 |
| 2  | 257.1721       | 129.0897        | 285.1670       | 143.0871        | 129.1135 | R          | 2841.484<br>0  | 1421.2456       | 20 |
| 3  | 354.2248       | 177.6161        | 382.2197       | 191.6135        | 70.0651  | P          | 2685.382<br>9  | 1343.1951       | 19 |
| 4  | 467.3089       | 234.1581        | 495.3038       | 248.1555        | 86.0964  | I          | 2588.330<br>1  | 1294.6687       | 18 |
| 5  | 614.3773       | 307.6923        | 642.3722       | 321.6897        | 120.0808 | F          | 2475.246<br>1  | 1238.1267       | 17 |
| 6  | 727.4614       | 364.2343        | 755.4563       | 378.2318        | 86.0964  | I          | 2328.177<br>6  | 1164.5925       | 16 |
| 7  | 840.5454       | 420.7764        | 868.5403       | 434.7738        | 86.0964  | I          | 2215.093<br>6  | 1108.0504       | 15 |
| 8  | 941.5931       | 471.3002        | 969.5880       | 485.2976        | 74.0600  | T          | 2102.009<br>5  | 1051.5084       | 14 |
| 9  | 1070.6357      | 535.8215        | 1098.630<br>6  | 549.8189        | 102.0550 | E          | 2000.961<br>8  | 1000.9846       | 13 |
| 10 | 1233.6990      | 617.3532        | 1261.693<br>9  | 631.3506        | 136.0757 | Y          | 1871.919<br>2  | 936.4633        | 12 |
| 11 | 1364.7395      | 682.8734        | 1392.734<br>4  | 696.8709        | 104.0529 | M          | 1708.855<br>9  | 854.9316        | 11 |
| 12 | 1435.7766      | 718.3920        | 1463.771<br>5  | 732.3894        | 44.0495  | A          | 1577.815<br>4  | 789.4114        | 10 |
| 13 | 1549.8196      | 775.4134        | 1577.814<br>5  | 789.4109        | 87.0553  | N          | 1506.778<br>3  | 753.8928        | 9  |
| 14 | 1606.8410      | 803.9241        | 1634.835<br>9  | 817.9216        | 30.0338  | G          | 1392.735<br>4  | 696.8713        | 8  |
| 15 | 2151.0775      | 1076.042<br>4   | 2179.072<br>5  | 1090.039<br>9   | 517.2489 | C-Labelled | 1335.713<br>9  | 668.3606        | 7  |
| 16 | 2264.1616      | 1132.584<br>4   | 2292.156<br>5  | 1146.581<br>9   | 86.0964  | L          | 791.4774       | 396.2423        | 6  |
| 17 | 2377.2457      | 1189.126<br>5   | 2405.240<br>6  | 1203.123<br>9   | 86.0964  | L          | 678.3933       | 339.7003        | 5  |
| 18 | 2491.2886      | 1246.147<br>9   | 2519.283<br>5  | 1260.145<br>4   | 87.0553  | N          | 565.3093       | 283.1583        | 4  |
| 19 | 2654.3519      | 1327.679<br>6   | 2682.346<br>8  | 1341.677<br>1   | 136.0757 | Y          | 451.2663       | 226.1368        | 3  |
| 20 | 2767.4360      | 1384.221<br>6   | 2795.430<br>9  | 1398.219<br>1   | 86.0964  | L          | 288.2030       | 144.6052        | 2  |
| 21 |                |                 |                |                 | 129.1135 | R          | 175.1190       | 88.0631         | 1  |

<sup>a</sup>The table shows calculated masses for a-, b-, y-, and immonium ions. The fragment ions detected in the MS/MS spectra that matched in the database search are highlighted in colour.

**Table S9 | Fragments matched for Evo-2-modified peptide (+3 charged precursor ion)<sup>a</sup>**

| #1 | a-NH <sub>3</sub> <sup>+</sup> | a-NH <sub>3</sub> <sup>2+</sup> | b-NH <sub>3</sub> <sup>+</sup> | b-NH <sub>3</sub> <sup>2+</sup> | Seq. uence | y-NH <sub>3</sub> <sup>+</sup> | y-NH <sub>3</sub> <sup>2+</sup> | #2 |
|----|--------------------------------|---------------------------------|--------------------------------|---------------------------------|------------|--------------------------------|---------------------------------|----|
| 1  | 84.0444                        | 42.5258                         | 112.0393                       | 56.5233                         | Q          |                                |                                 | 21 |
| 2  | 240.1455                       | 120.5764                        | 268.1404                       | 134.5739                        | R          | 2824.457<br>4                  | 1412.7324                       | 20 |
| 3  | 337.1983                       | 169.1028                        | 365.1932                       | 183.1002                        | P          | 2668.356<br>3                  | 1334.6818                       | 19 |
| 4  | 450.2823                       | 225.6448                        | 478.2772                       | 239.6423                        | I          | 2571.303<br>6                  | 1286.1554                       | 18 |
| 5  | 597.3507                       | 299.1790                        | 625.3457                       | 313.1765                        | F          | 2458.219<br>5                  | 1229.6134                       | 17 |
| 6  | 710.4348                       | 355.7210                        | 738.4297                       | 369.7185                        | I          | 2311.151<br>1                  | 1156.0792                       | 16 |
| 7  | 823.5189                       | 412.2631                        | 851.5138                       | 426.2605                        | I          | 2198.067<br>0                  | 1099.5372                       | 15 |
| 8  | 924.5666                       | 462.7869                        | 952.5615                       | 476.7844                        | T          | 2084.983<br>0                  | 1042.9951                       | 14 |
| 9  | 1053.6091                      | 527.3082                        | 1081.604<br>1                  | 541.3057                        | E          | 1983.935<br>3                  | 992.4713                        | 13 |
| 10 | 1216.6725                      | 608.8399                        | 1244.667<br>4                  | 622.8373                        | Y          | 1854.892<br>7                  | 927.9500                        | 12 |
| 11 | 1347.7130                      | 674.3601                        | 1375.707<br>9                  | 688.3576                        | M          | 1691.829<br>4                  | 846.4183                        | 11 |
| 12 | 1418.7501                      | 709.8787                        | 1446.745<br>0                  | 723.8761                        | A          | 1560.788<br>9                  | 780.8981                        | 10 |
| 13 | 1532.7930                      | 766.9001                        | 1560.787<br>9                  | 780.8976                        | N          | 1489.751<br>8                  | 745.3795                        | 9  |
| 14 | 1589.8145                      | 795.4109                        | 1617.809<br>4                  | 809.4083                        | G          | 1375.708<br>8                  | 688.3581                        | 8  |
| 15 | 2134.0510                      | 1067.529<br>1                   | 2162.045<br>9                  | 1081.526<br>6                   | C-Labelled | 1318.687<br>4                  | 659.8473                        | 7  |
| 16 | 2247.1351                      | 1124.071<br>2                   | 2275.130<br>0                  | 1138.068<br>6                   | L          | 774.4509                       | 387.7291                        | 6  |
| 17 | 2360.2191                      | 1180.613<br>2                   | 2388.214<br>0                  | 1194.610<br>7                   | L          | 661.3668                       | 331.1870                        | 5  |
| 18 | 2474.2620                      | 1237.634<br>7                   | 2502.257<br>0                  | 1251.632<br>1                   | N          | 548.2827                       | 274.6450                        | 4  |
| 19 | 2637.3254                      | 1319.166<br>3                   | 2665.320<br>3                  | 1333.163<br>8                   | Y          | 434.2398                       | 217.6235                        | 3  |
| 20 | 2750.4094                      | 1375.708<br>4                   | 2778.404<br>4                  | 1389.705<br>8                   | L          | 271.1765                       | 136.0919                        | 2  |
| 21 |                                |                                 |                                |                                 | R          | 158.0924                       | 79.5498                         | 1  |

<sup>a</sup>The table shows calculated masses for a-, b-, and y-ions with loss of NH<sub>3</sub>. The fragment ions detected in the MS/MS spectra that matched in the database search are highlighted in colour.



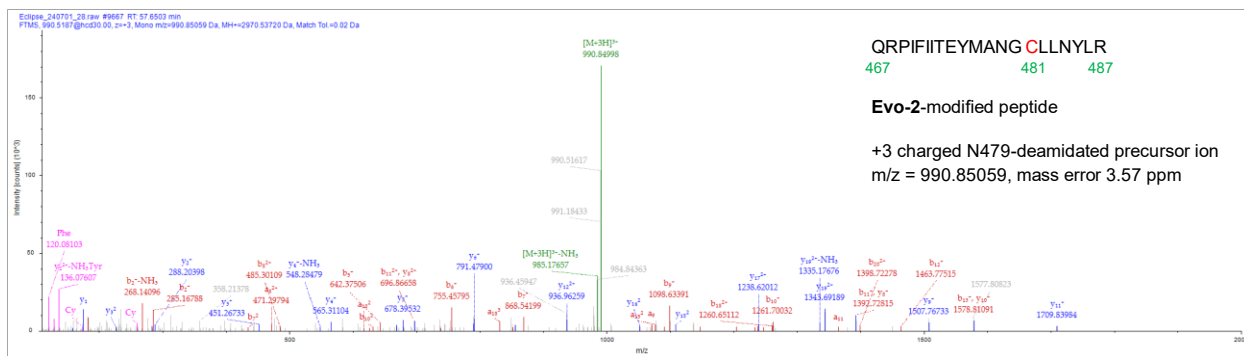

**Figure S7.** MS/MS-spectrum of the +3 charged N479-deamidated precursor ion of the **Evo-2**-modified peptide (467-487), resulting from BTK incubation with **Evo-2**. Peaks are coloured as follows: y-ions in blue, a- and b-ions in red, immonium ions in magenta, precursor ions in green, and other ions in grey. The fragment ions that matched in the database search are highlighted in **Tables S10** and **S11**.

**Table S10 | Fragments matched for Evo-2-modified peptide (+3 charged N-deamidated precursor ion)<sup>a</sup>**

| #1 | a <sup>+</sup> | a <sup>2+</sup> | b <sup>+</sup> | b <sup>2+</sup> | Immonium | Seq. uence   | y <sup>+</sup> | y <sup>2+</sup> | #2 |
|----|----------------|-----------------|----------------|-----------------|----------|--------------|----------------|-----------------|----|
| 1  | 101.0709       | 51.0391         | 129.0659       | 65.0366         | 101.0709 | Q            |                |                 | 21 |
| 2  | 257.1721       | 129.0897        | 285.1670       | 143.0871        | 129.1135 | R            | 2842.4680      | 1421.7376       | 20 |
| 3  | 354.2248       | 177.6161        | 382.2197       | 191.6135        | 70.0651  | P            | 2686.3669      | 1343.6871       | 19 |
| 4  | 467.3089       | 234.1581        | 495.3038       | 248.1555        | 86.0964  | I            | 2589.3141      | 1295.1607       | 18 |
| 5  | 614.3773       | 307.6923        | 642.3722       | 321.6897        | 120.0808 | F            | 2476.2301      | 1238.6187       | 17 |
| 6  | 727.4614       | 364.2343        | 755.4563       | 378.2318        | 86.0964  | I            | 2329.1617      | 1165.0845       | 16 |
| 7  | 840.5454       | 420.7764        | 868.5403       | 434.7738        | 86.0964  | I            | 2216.0776      | 1108.5424       | 15 |
| 8  | 941.5931       | 471.3002        | 969.5880       | 485.2976        | 74.0600  | T            | 2102.9935      | 1052.0004       | 14 |
| 9  | 1070.6357      | 535.8215        | 1098.6306      | 549.8189        | 102.0550 | E            | 2001.9459      | 1001.4766       | 13 |
| 10 | 1233.6990      | 617.3532        | 1261.6939      | 631.3506        | 136.0757 | Y            | 1872.9033      | 936.9553        | 12 |
| 11 | 1364.7395      | 682.8734        | 1392.7344      | 696.8709        | 104.0529 | M            | 1709.8399      | 855.4236        | 11 |
| 12 | 1435.7766      | 718.3920        | 1463.7715      | 732.3894        | 44.0495  | A            | 1578.7995      | 789.9034        | 10 |
| 13 | 1550.8036      | 775.9054        | 1578.7985      | 789.9029        | 88.0393  | N-Deamidated | 1507.7623      | 754.3848        | 9  |
| 14 | 1607.8250      | 804.4162        | 1635.8199      | 818.4136        | 30.0338  | G            | 1392.7354      | 696.8713        | 8  |
| 15 | 2152.0616      | 1076.5344       | 2180.0565      | 1090.5319       | 517.2489 | C-Labelled   | 1335.7139      | 668.3606        | 7  |
| 16 | 2265.1456      | 1133.0765       | 2293.1405      | 1147.0739       | 86.0964  | L            | 791.4774       | 396.2423        | 6  |
| 17 | 2378.2297      | 1189.6185       | 2406.2246      | 1203.6159       | 86.0964  | L            | 678.3933       | 339.7003        | 5  |
| 18 | 2492.2726      | 1246.6399       | 2520.2675      | 1260.6374       | 87.0553  | N            | 565.3093       | 283.1583        | 4  |
| 19 | 2655.3359      | 1328.1716       | 2683.3309      | 1342.1691       | 136.0757 | Y            | 451.2663       | 226.1368        | 3  |
| 20 | 2768.4200      | 1384.7136       | 2796.4149      | 1398.7111       | 86.0964  | L            | 288.2030       | 144.6052        | 2  |
| 21 |                |                 |                |                 | 129.1135 | R            | 175.1190       | 88.0631         | 1  |

<sup>a</sup>The table shows calculated masses for a-, b-, y-, and immonium ions. The fragment ions detected in the MS/MS spectra that matched in the database search are highlighted in colour.

**Table S11 | Fragments matched for Evo-2-modified peptide (+3 charged N-deamidated precursor ion)<sup>a</sup>**

| #1 | a-NH <sub>3</sub> <sup>+</sup> | a-NH <sub>3</sub> <sup>2+</sup> | b-NH <sub>3</sub> <sup>+</sup> | b-NH <sub>3</sub> <sup>2+</sup> | Seq. uence   | y-NH <sub>3</sub> <sup>+</sup> | y-NH <sub>3</sub> <sup>2+</sup> | #2 |
|----|--------------------------------|---------------------------------|--------------------------------|---------------------------------|--------------|--------------------------------|---------------------------------|----|
| 1  | 84.0444                        | 42.5258                         | 112.0393                       | 56.5233                         | Q            |                                |                                 | 21 |
| 2  | 240.1455                       | 120.5764                        | 268.1404                       | 134.5739                        | R            | 2825.441<br>5                  | 1413.2244                       | 20 |
| 3  | 337.1983                       | 169.1028                        | 365.1932                       | 183.1002                        | P            | 2669.340<br>4                  | 1335.1738                       | 19 |
| 4  | 450.2823                       | 225.6448                        | 478.2772                       | 239.6423                        | I            | 2572.287<br>6                  | 1286.6474                       | 18 |
| 5  | 597.3507                       | 299.1790                        | 625.3457                       | 313.1765                        | F            | 2459.203<br>5                  | 1230.1054                       | 17 |
| 6  | 710.4348                       | 355.7210                        | 738.4297                       | 369.7185                        | I            | 2312.135<br>1                  | 1156.5712                       | 16 |
| 7  | 823.5189                       | 412.2631                        | 851.5138                       | 426.2605                        | I            | 2199.051<br>0                  | 1100.0292                       | 15 |
| 8  | 924.5666                       | 462.7869                        | 952.5615                       | 476.7844                        | T            | 2085.967<br>0                  | 1043.4871                       | 14 |
| 9  | 1053.6091                      | 527.3082                        | 1081.604<br>1                  | 541.3057                        | E            | 1984.919<br>3                  | 992.9633                        | 13 |
| 10 | 1216.6725                      | 608.8399                        | 1244.667<br>4                  | 622.8373                        | Y            | 1855.876<br>7                  | 928.4420                        | 12 |
| 11 | 1347.7130                      | 674.3601                        | 1375.707<br>9                  | 688.3576                        | M            | 1692.813<br>4                  | 846.9103                        | 11 |
| 12 | 1418.7501                      | 709.8787                        | 1446.745<br>0                  | 723.8761                        | A            | 1561.772<br>9                  | 781.3901                        | 10 |
| 13 | 1533.7770                      | 767.3921                        | 1561.771<br>9                  | 781.3896                        | N-Deamidated | 1490.735<br>8                  | 745.8715                        | 9  |
| 14 | 1590.7985                      | 795.9029                        | 1618.793<br>4                  | 809.9003                        | G            | 1375.708<br>8                  | 688.3581                        | 8  |
| 15 | 2135.0350                      | 1068.021<br>1                   | 2163.029<br>9                  | 1082.018<br>6                   | C-Labelled   | 1318.687<br>4                  | 659.8473                        | 7  |
| 16 | 2248.1191                      | 1124.563<br>2                   | 2276.114<br>0                  | 1138.560<br>6                   | L            | 774.4509                       | 387.7291                        | 6  |
| 17 | 2361.2031                      | 1181.105<br>2                   | 2389.198<br>0                  | 1195.102<br>7                   | L            | 661.3668                       | 331.1870                        | 5  |
| 18 | 2475.2461                      | 1238.126<br>7                   | 2503.241<br>0                  | 1252.124<br>1                   | N            | 548.2827                       | 274.6450                        | 4  |
| 19 | 2638.3094                      | 1319.658<br>3                   | 2666.304<br>3                  | 1333.655<br>8                   | Y            | 434.2398                       | 217.6235                        | 3  |
| 20 | 2751.3935                      | 1376.200<br>4                   | 2779.388<br>4                  | 1390.197<br>8                   | L            | 271.1765                       | 136.0919                        | 2  |
| 21 |                                |                                 |                                |                                 | R            | 158.0924                       | 79.5498                         | 1  |

<sup>a</sup>The table shows calculated masses for a-, b-, and y-ions with loss of NH<sub>3</sub>. The fragment ions detected in the MS/MS spectra that matched in the database search are highlighted in colour.

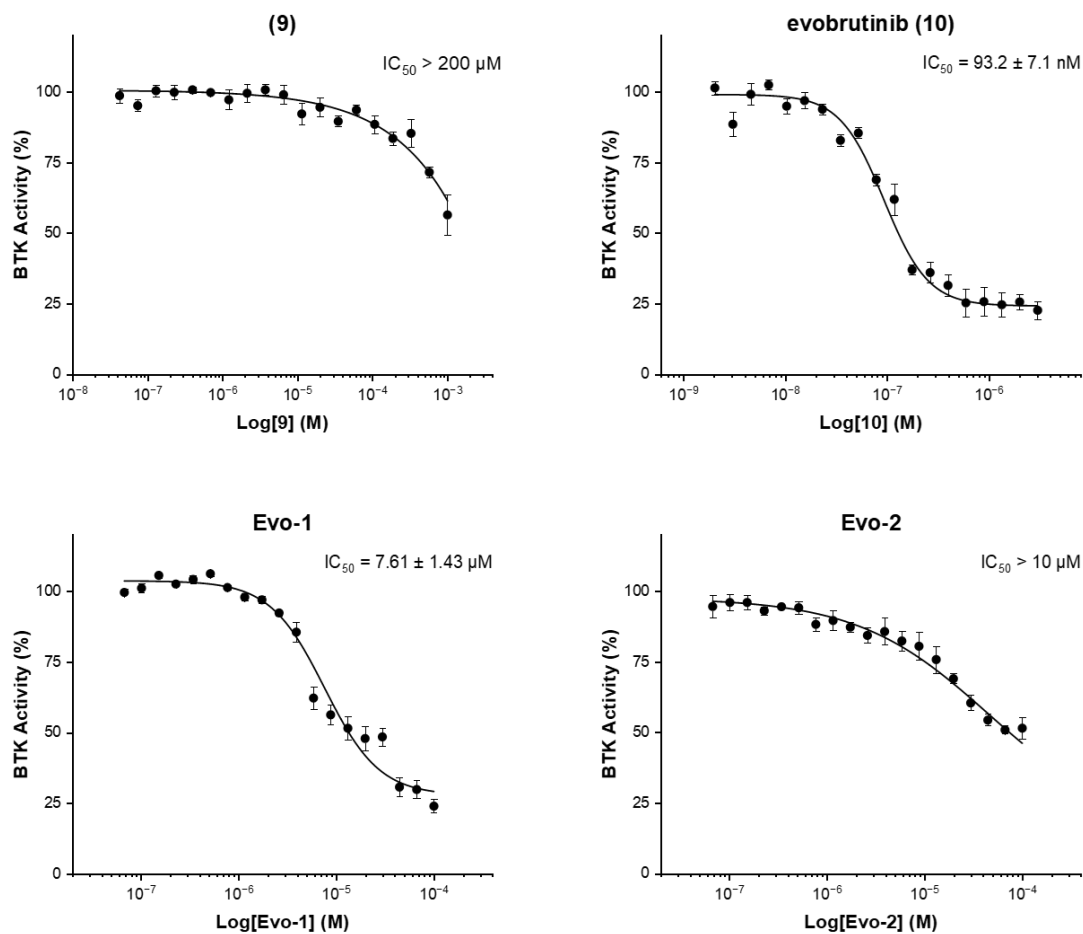

**Figure S8.  $IC_{50}$  values of compounds 9, 10, Evo-1, and Evo-2 against full-length BTK.** An ADP-Glo Assay was performed with 10 ng of BTK, 50  $\mu\text{M}$  ATP, 0.2  $\mu\text{g}/\mu\text{L}$  Poly(Glu<sub>4</sub>Tyr<sub>1</sub>), test compounds (0-1000  $\mu\text{M}$ ) and 1% DMSO. Data are presented as the mean  $\pm$  SD ( $n = 4$ ).

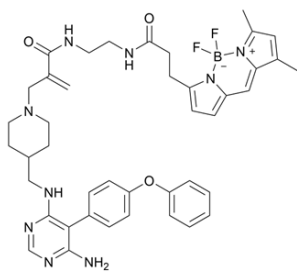

Evo-1

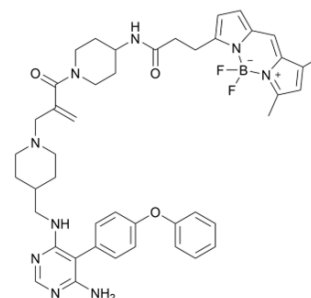

Evo-2

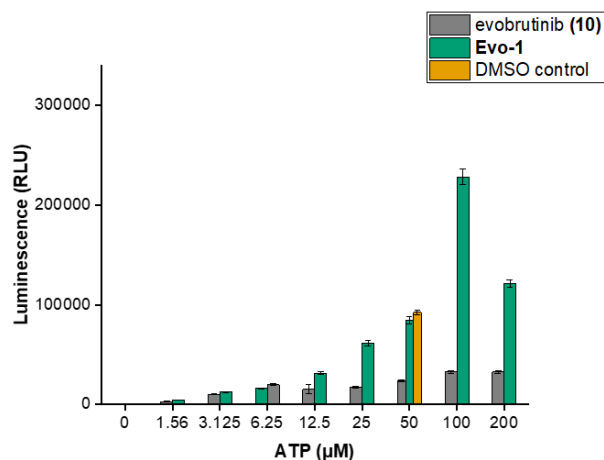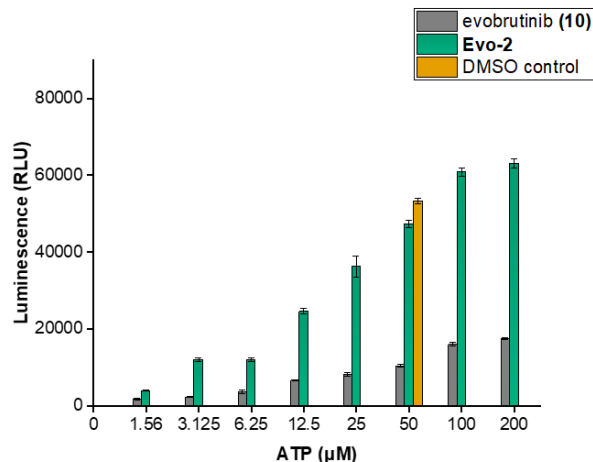

**Figure S9. Evo-1 and Evo-2 do not interfere with the ATP-binding in recombinant BTK.** An ADP-Glo Assay was performed with 10 ng of BTK, 500 nM **Evo-1** or **Evo-2** (green bars), or evobrutinib (grey bars) under increasing concentrations of ATP. Control experiments with DMSO under normal assay conditions (50 μM ATP, orange) were also performed. Luminescence is presented as relative luminescence units [RLU]. Data are presented as the mean ± SD ( $n = 3$ ).

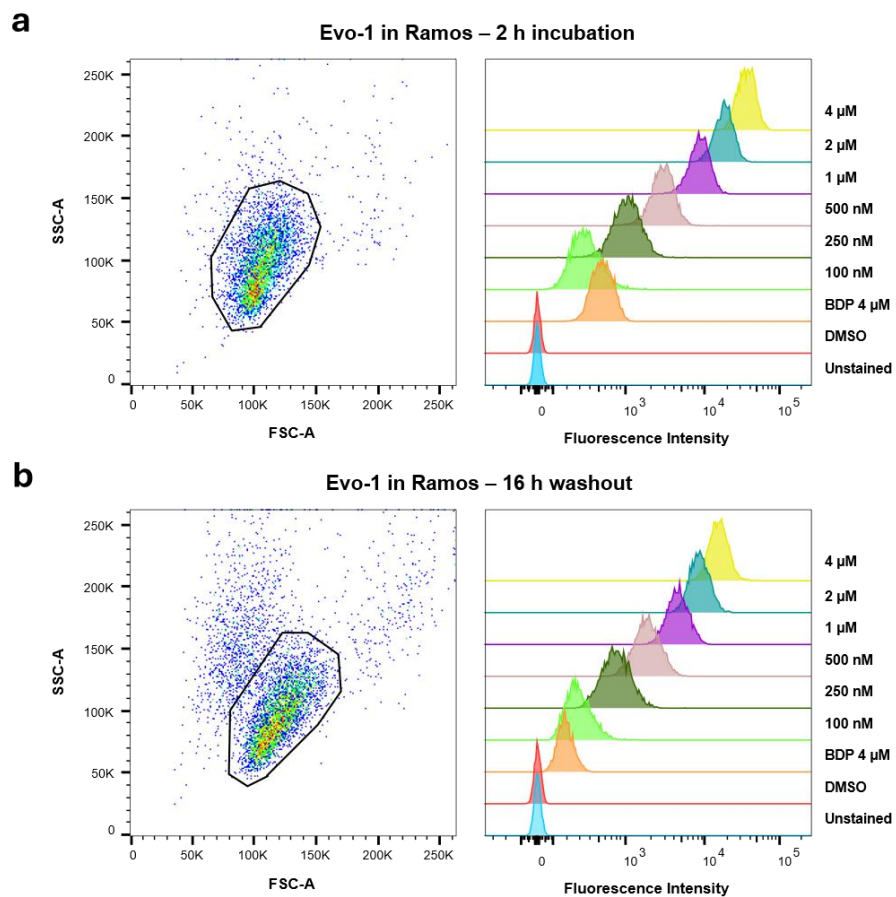

**Figure S10. Cellular uptake of Evo-1 in Ramos cells.** Histogram of fluorescence intensities after, **a** 2 h incubation and **b** 2 h incubation followed by 16 h washout.

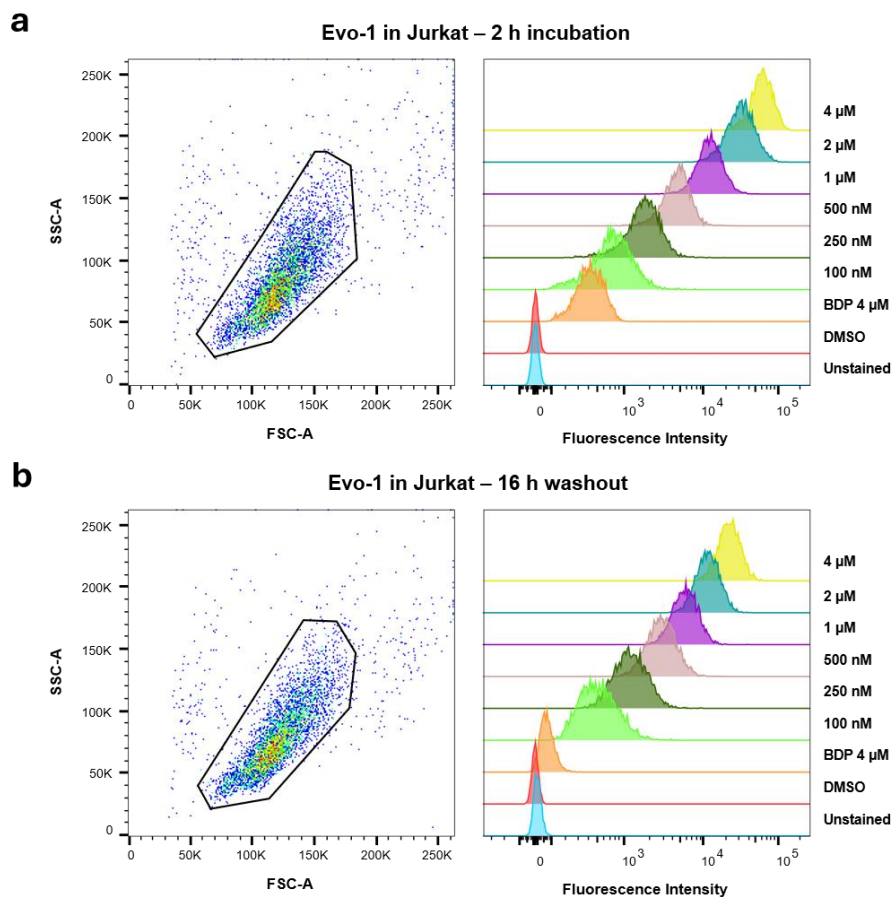

**Figure S11. Cellular uptake of Evo-1 in Jurkat cells.** Histogram of fluorescence intensities after, **a** 2 h incubation and **b** 2 h incubation followed by 16 h washout.

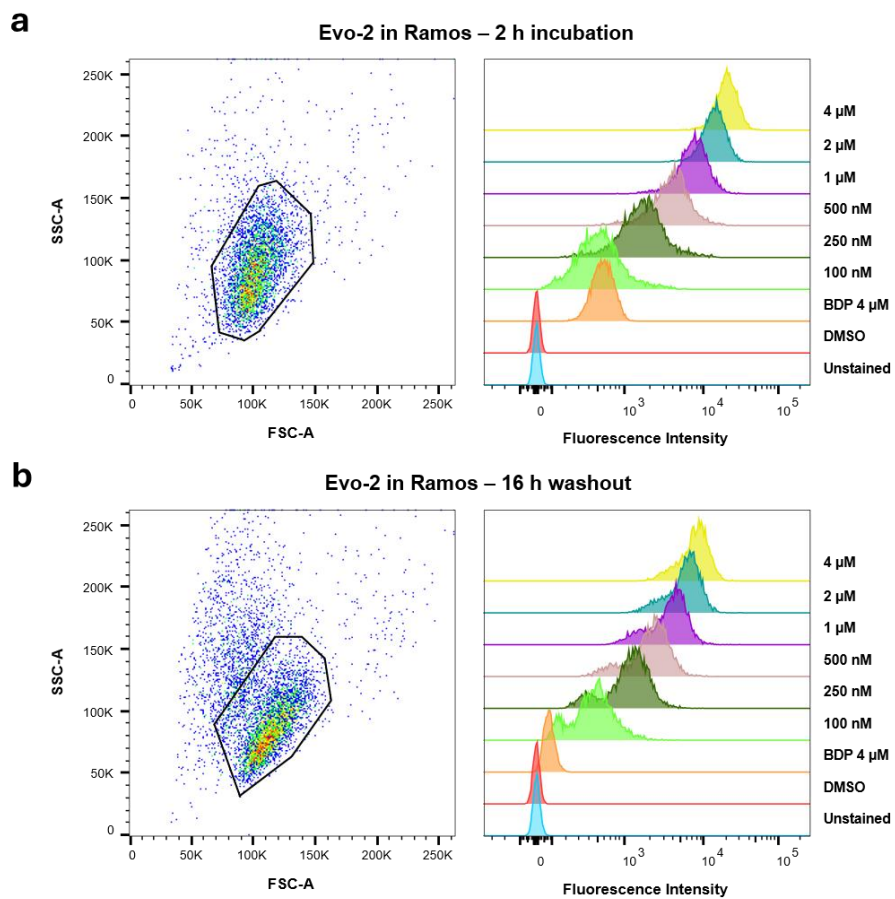

**Figure S12. Cellular uptake of Evo-2 in Ramos cells.** Histogram of fluorescence intensities after, **a** 2 h incubation and **b** 2 h incubation followed by 16 h washout.



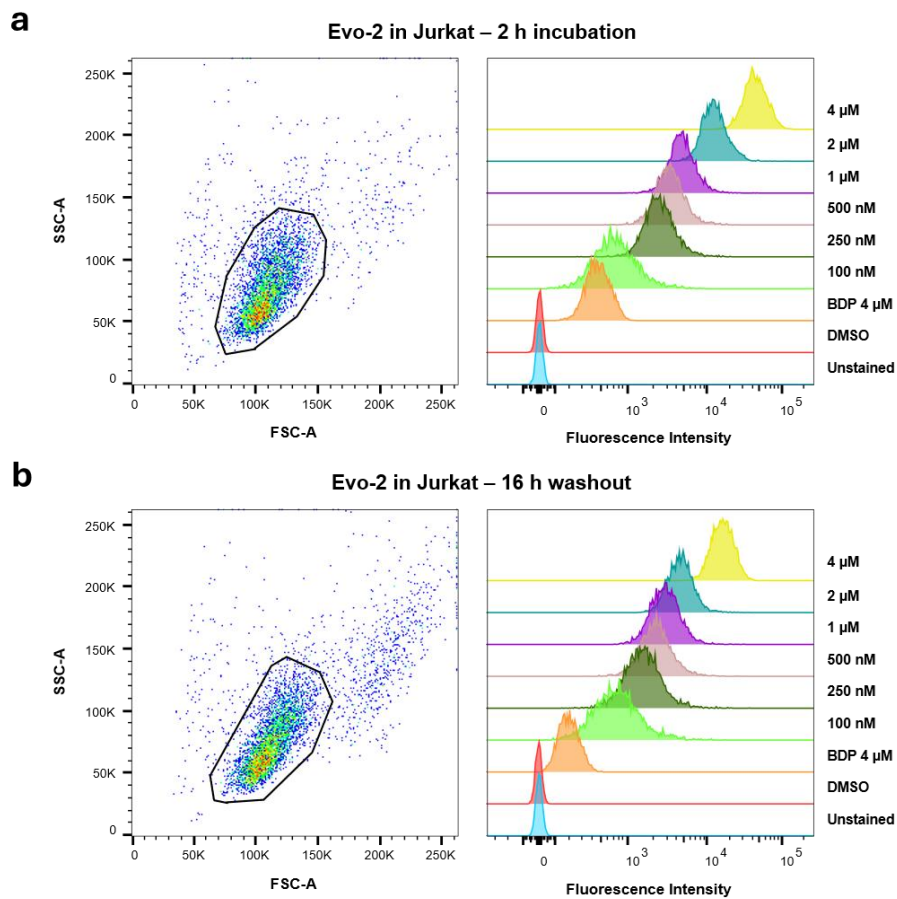

**Figure S13. Cellular uptake of Evo-2 in Jurkat cells.** Histogram of fluorescence intensities after, **a** 2 h incubation and **b** 2 h incubation followed by 16 h washout.

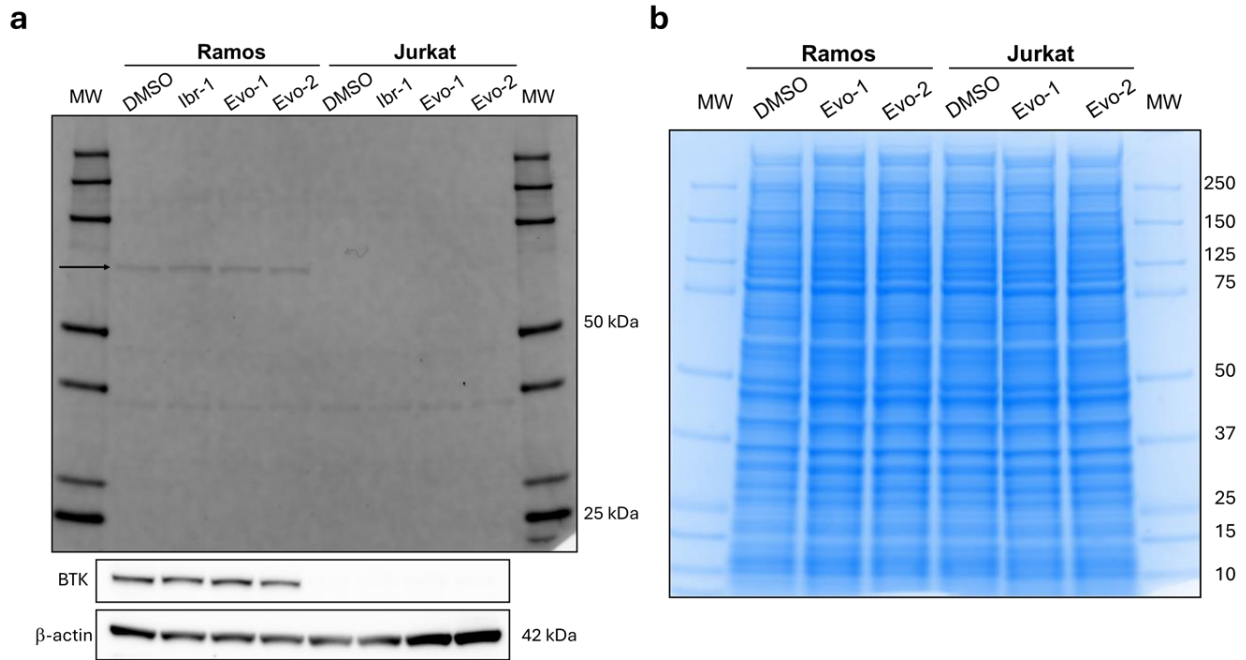

**Figure S14. BTK expression in Ramos and Jurkat cells as assessed by immunoblotting.** **a** Membrane fluorescence reading. Immunoblotting with mouse anti-BTK antibody followed by goat anti-mouse Alexa633 secondary antibody (top). Fluorescence detection of cross-coupled BTK with Alexa633 secondary antibody was performed on a ChemiDoc Imager (Alexa647 filter). The black arrow indicates the labelled BTK. Membranes were re-blotted with antibodies against BTK and  $\beta$ -actin and the presence of BTK was tested using the relevant antibodies by Western blot (bottom panel). MW fluorescent markers of 50 and 25 kDa are shown on the far left and right of the gel. **b** Total protein staining of the same gel with Colloidal blue. Size marker is shown on the far left and right.

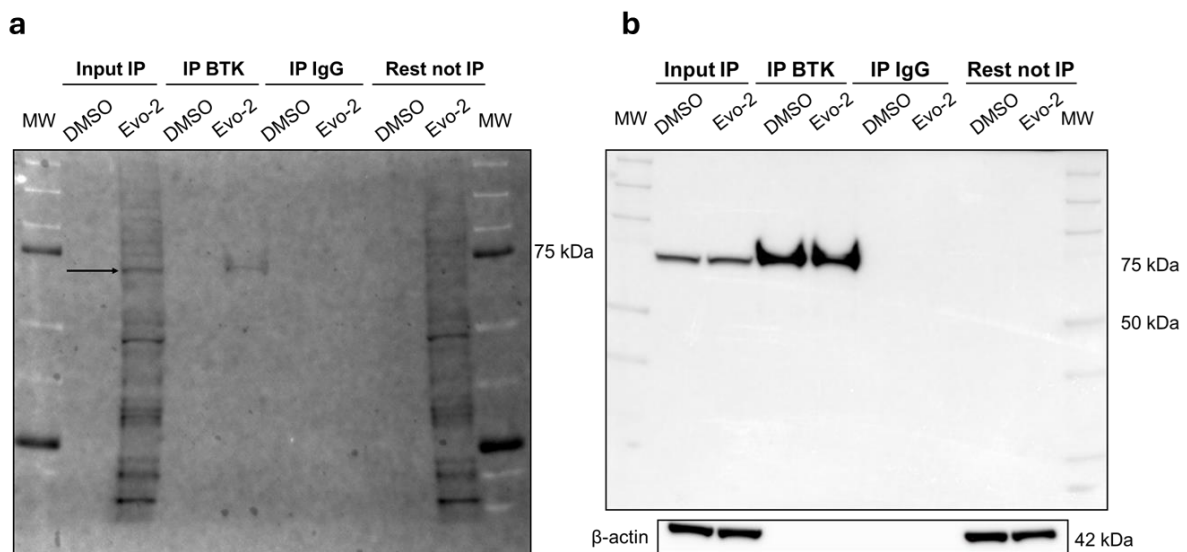

**Figure S15. Immunoprecipitation of Evo-2-bound-BTK in Ramos cells after treatment with 4  $\mu$ M Evo-2 for 4 h.** **a** Detection of the immunoprecipitated BTK bound to **Evo-2** via fluorescence (ChemiDoc apparatus, Cy2 filter). The black arrow indicates the labelled BTK. MW fluorescent markers of 75 kDa are shown on the far left and right of the gel. **b** Membranes were immunoassayed with antibodies against BTK and  $\beta$ -actin respectively. MW size markers are shown on the far left and right of the membrane.

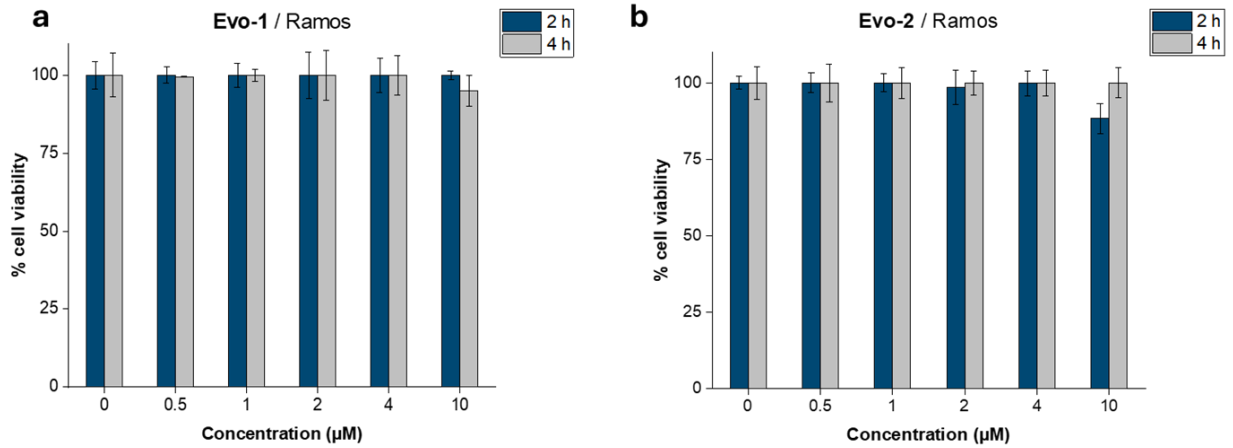

**Figure S16. Cell cytotoxicity assay for probes Evo-1 and Evo-2 in Ramos cells.** Ramos cells were treated with **Evo-1** and **Evo-2** at a range of concentrations 0-10  $\mu$ M for 2 h (blue bars) and 4 h (grey bars) respectively. Data are presented as the mean  $\pm$  SD ( $n = 3$ ).

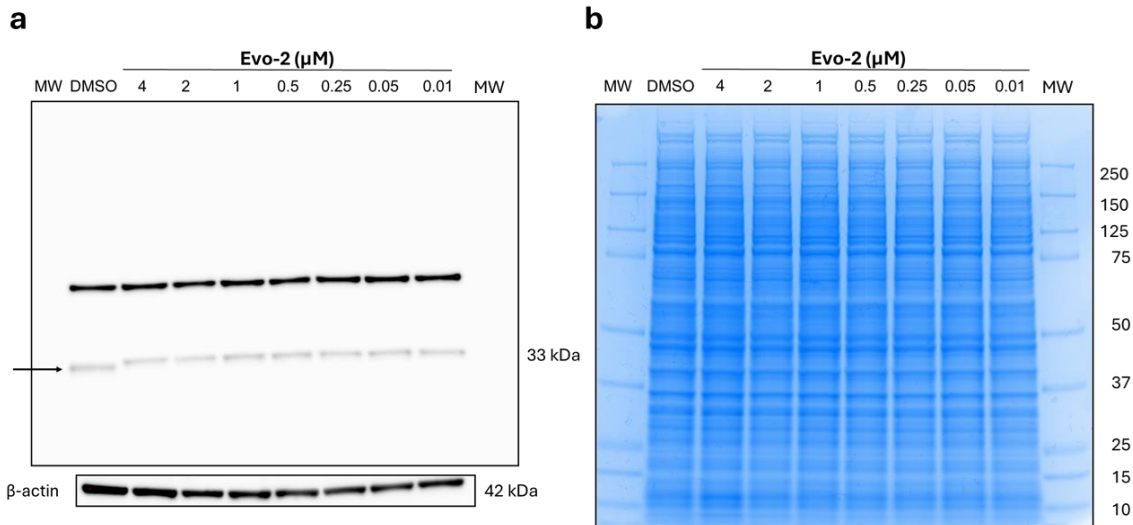

**Figure S17. Binding of Evo-2 to SLC25A20 as suggested by immunoblotting.** **a** Western blot analysis of Ramos whole-cell lysates after incubation with different concentrations of **Evo-2** for 2 h using rabbit monoclonal anti-SLC25A20 antibody (Abclonal, #ab23763). Note that the antibody for SLC25A20 gives also a nonspecific band at 50 kDa in addition to the specific band at around 30 kDa that corresponds to SLC25A20's MW (indicated by a black arrow). The slight difference in the protein's electrophoretic mobility

is probably attributed to the binding of **Evo-2** to SLC25A20, thus increasing the total MW compared to the DMSO control. **b** Total protein staining of the same gel with Colloidal blue. Size marker is shown on the far left and right.

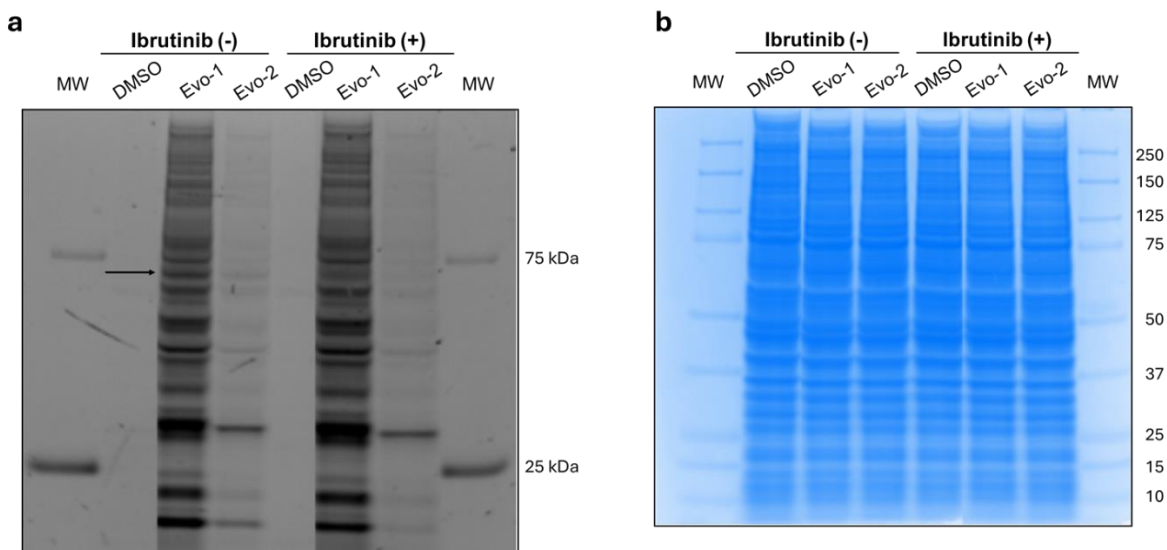

**Figure S18. Competition experiment with ibrutinib.** Pre-treatment of Ramos cells with 5  $\mu$ M ibrutinib reduced the binding of fluorescent probes (500 nM) to BTK suggesting that the probes bind to the same site on cellular BTK as ibrutinib. **a** Cellular protein labelling profile of **Evo-1** and **Evo-2** in Ramos and Jurkat cells. Cells were pre-treated with ibrutinib (5  $\mu$ M) for 30 min followed by incubation with 500 nM of compound or 0.1% DMSO for 2 h. The cells were washed, lysed, and cellular proteins were separated on SDS-PAGE gel under denatured and reduced conditions. The fluorescent signals of cellular proteins labelled by the probes were detected using a ChemiDoc apparatus (Alexa488 filter). The black arrow indicates the labelled BTK. MW fluorescent markers of 75 and 25 kDa are shown on the far left and right of the gel. **b** Total protein staining of the same gel with Colloidal blue. MW Size marker is shown on the far left and right of the gel.

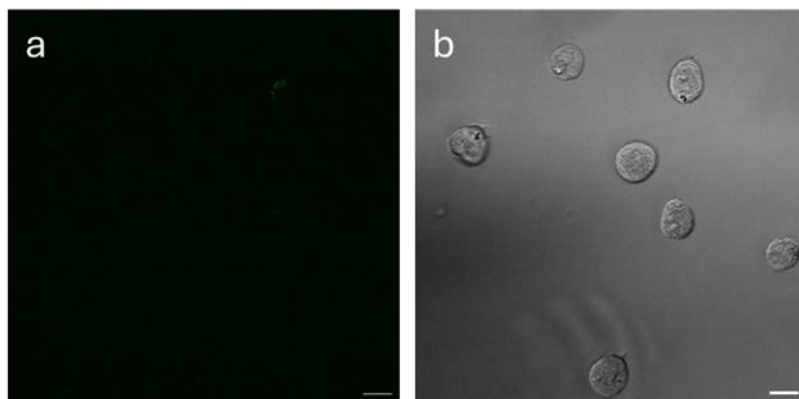

**Figure S19. Fluorescence images of control Ramos cells without addition of Evo-2.** **a** Fluorescence images were captured under probe's excitation wavelength (green,  $\lambda_{exc} = 488$  nm). **b** Corresponding bright-field image. Scale bars: 10  $\mu$ m.

Corrected Total Cell Fluorescence (CTCF) was calculated by using ImageJ<sup>5</sup>, and according to the following equation:

$$CTCF = Integrated\ Density - (Area\ of\ selected\ cell \times Mean\ fluorescence\ of\ background\ readings)$$

For the calculation of CTCF, three-dimensional images or Z-stacks were reduced to bidimensional images by arithmetic sum of the fluorescence intensity of the different slices. CTCF was expressed as the average of measuring various cells. As for the background readings, equal number of regions of interest (ROIs) were drawn in the corresponding pictures.

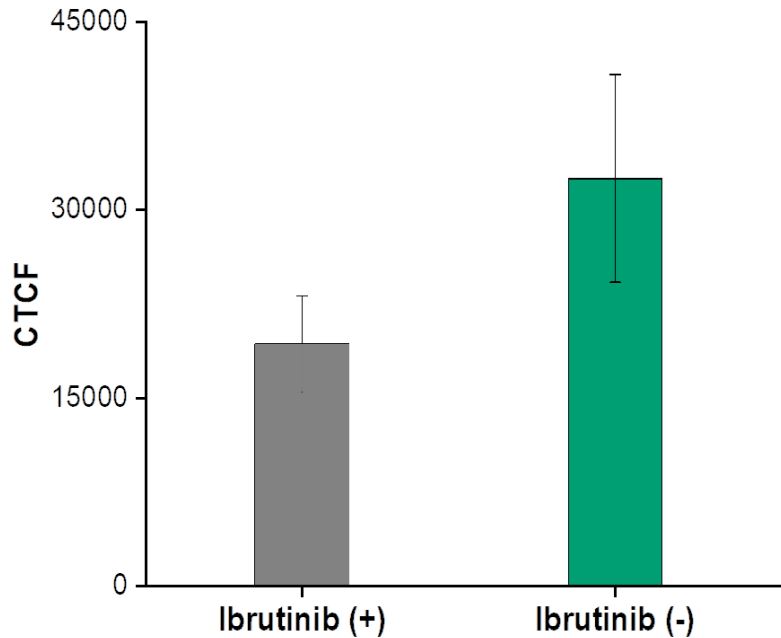

**Figure S20. Competition experiment with ibrutinib - differences in fluorescence intensities as assessed by CTCF analysis.** Ramos cells were pretreated with (grey bar) or without ibrutinib (green bar) (5  $\mu$ M) for 30 minutes followed by incubation with **Evo-2** (1  $\mu$ M) for 2 h. CTCF was expressed as the average of measuring various cells.

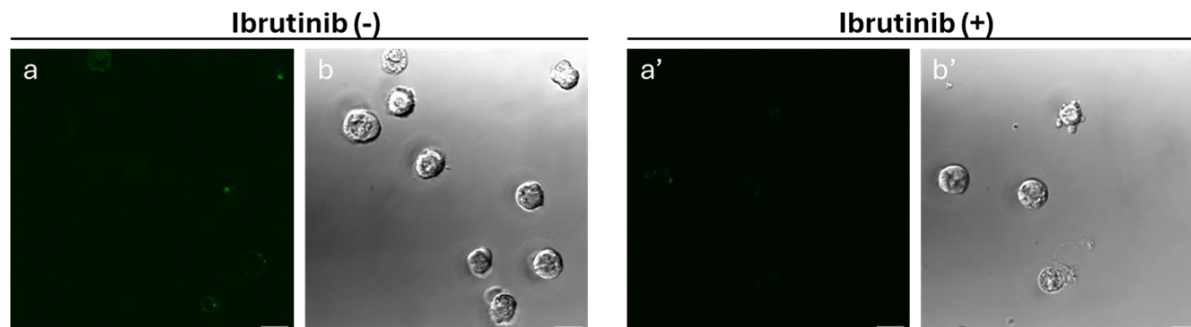

**Figure S21. Fluorescence images of control Ramos cells after incubation with or without Ibrutinib (5  $\mu\text{M}$ ) and without addition of Evo-2.** **a, a'** Fluorescence images were captured under probe's excitation wavelength (green,  $\lambda_{\text{exc}} = 488 \text{ nm}$ ). **b, b'** Corresponding bright-field images. Scale bars: 10  $\mu\text{m}$ .

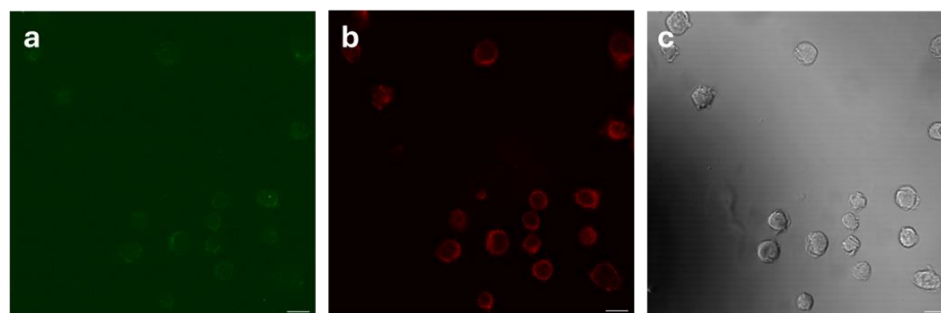

**Figure S22. Fluorescence images of control fixed Ramos cells stained with anti-BTK/Alexa633 antibodies.** Ramos cells were treated with DMSO for 2 h. After fixation, permeabilization, and antibody staining, cells were imaged under, **a** Probe's excitation wavelength (green,  $\lambda_{\text{exc}} = 488 \text{ nm}$ ), **b** antibodies' excitation wavelength (red,  $\lambda_{\text{exc}} = 633 \text{ nm}$ ). **c** Corresponding bright-field image. Scale bars: 10  $\mu\text{m}$ .

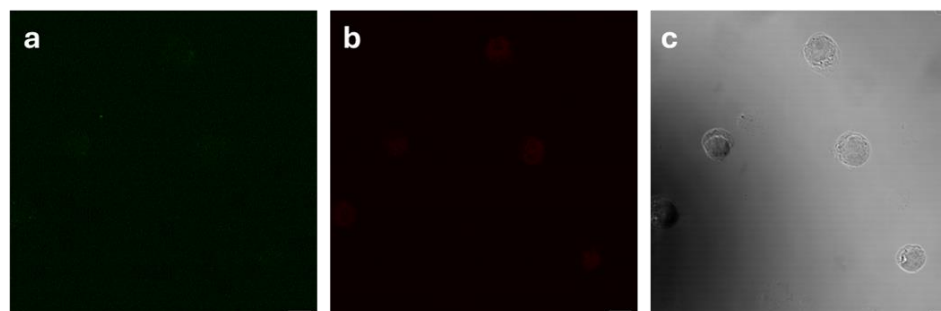

**Figure S23. Fluorescence images of control fixed Ramos cells stained with isotype control/Alexa633 antibodies.** Ramos cells were treated with DMSO for 2 h. After fixation, permeabilization, and antibody staining, cells were imaged under, **a** Probe's excitation wavelength (green,  $\lambda_{\text{exc}} = 488 \text{ nm}$ ), **b** antibodies' excitation wavelength (red,  $\lambda_{\text{exc}} = 633 \text{ nm}$ ). **c** Corresponding bright-field image. Scale bars: 10  $\mu\text{m}$ .

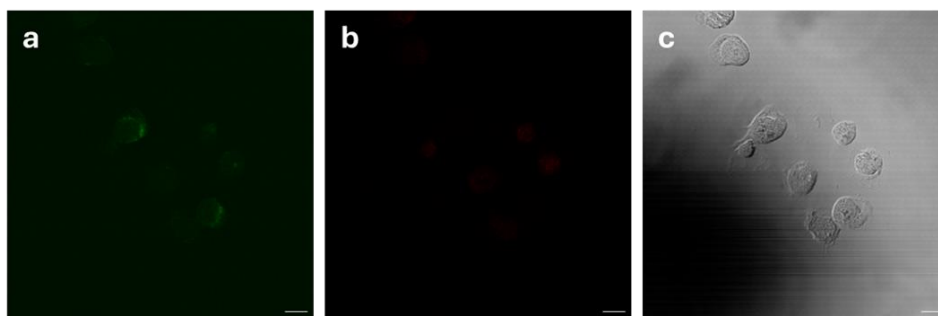

**Figure S24.** Fluorescence images of control fixed Ramos cells stained with isotype control/Alexa633 antibodies. Ramos cells were treated with 1  $\mu\text{M}$  Evo-2 for 2 h. After fixation, permeabilization, and antibody staining, cells were imaged under, **a** Probe's excitation wavelength (green,  $\lambda_{\text{exc}} = 488$  nm), **b** antibodies' excitation wavelength (red,  $\lambda_{\text{exc}} = 633$  nm). **c** Corresponding bright-field image. Scale bars: 10  $\mu\text{m}$ .

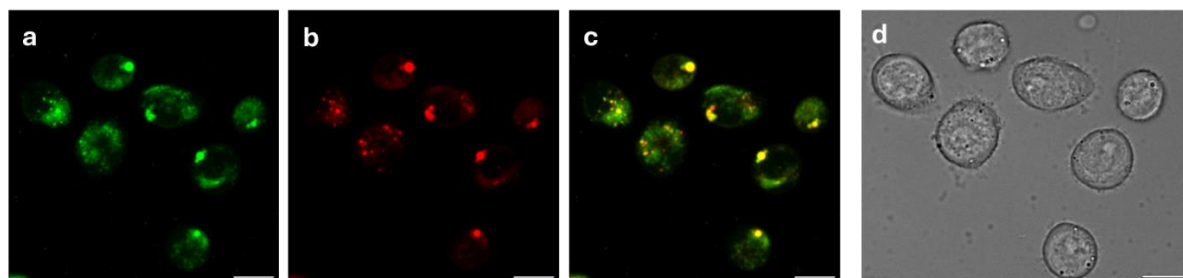

**Figure S25.** Fluorescence images of Ramos cells treated with Evo-2 and LysoTracker DeepRed. Ramos cells were treated with 1  $\mu\text{M}$  Evo-2 for 2 h, followed by treatment with LysoTracker Deep Red (50 nM, 30 min) and cells were imaged under, **a** Probe's excitation wavelength (green,  $\lambda_{\text{exc}} = 488$  nm), **b** LysoTracker's excitation wavelength (red,  $\lambda_{\text{exc}} = 639$  nm). **c** Corresponding bright-field image. Scale bars: 10  $\mu\text{m}$ .

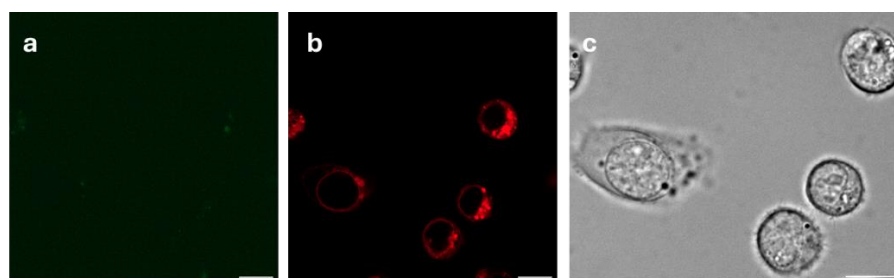

**Figure S26.** Fluorescence images of control Ramos cells treated with DMSO and LysoTracker DeepRed. Ramos cells were treated with DMSO for 2 h, followed by treatment with LysoTracker Deep Red (50 nM, 30 min) and cells were imaged under, **a** Probe's excitation wavelength (green,  $\lambda_{\text{exc}} = 488$  nm), **b** LysoTracker's excitation wavelength (red,  $\lambda_{\text{exc}} = 639$  nm). **c** Corresponding bright-field image. Scale bars: 10  $\mu\text{m}$ .

# NMR Spectra

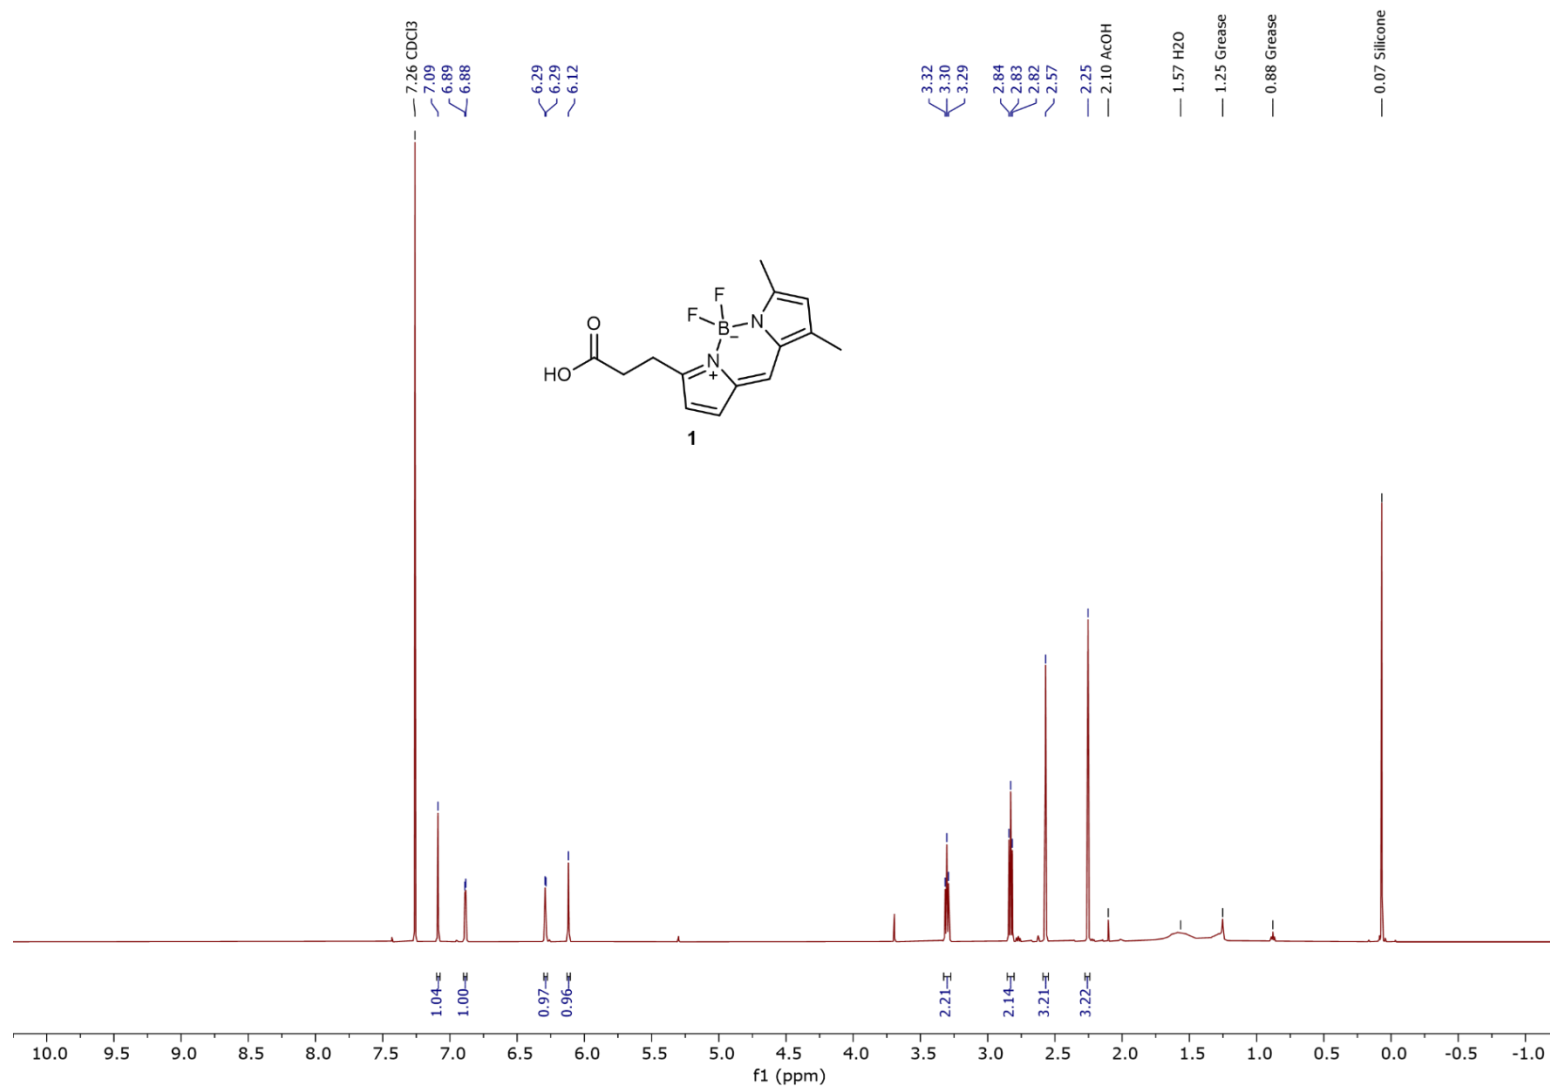

Figure S27. <sup>1</sup>H NMR spectrum of compound **1** (600 MHz, CDCl<sub>3</sub>).



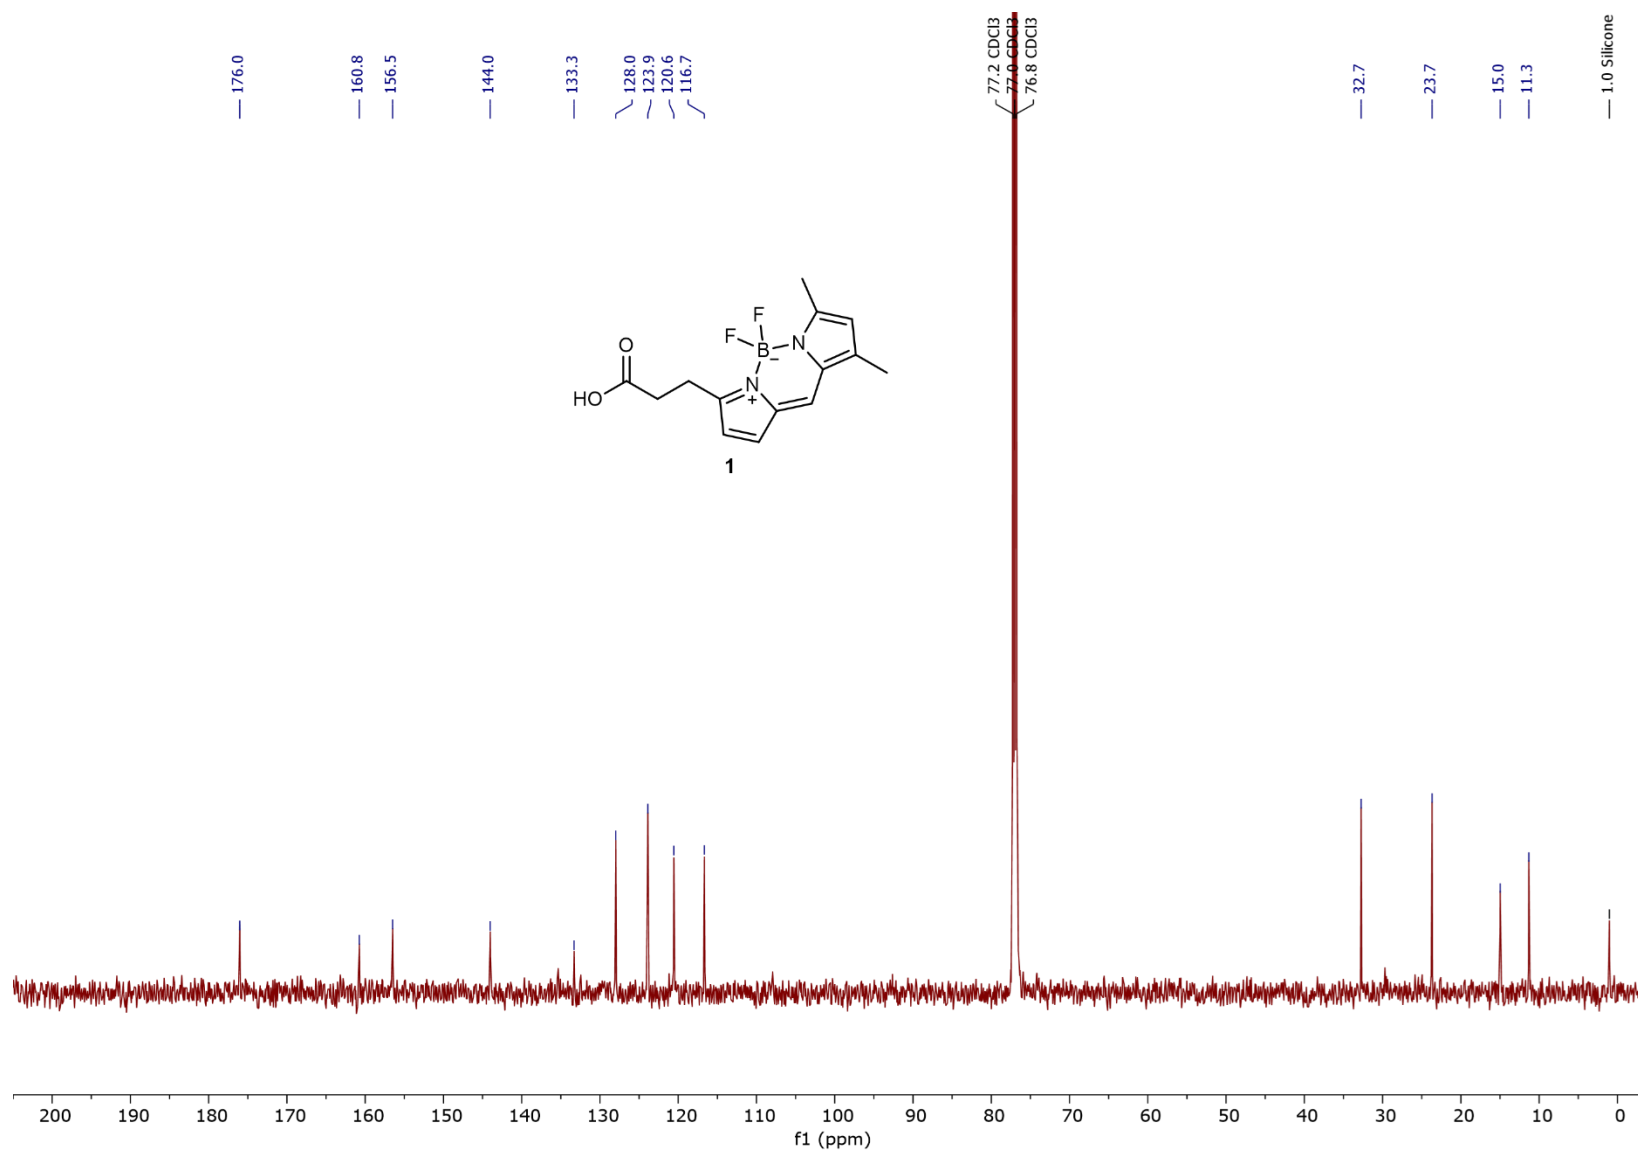

**Figure S18.**  $^{13}\text{C}\{^1\text{H}\}$  NMR spectrum of compound **1** (151 MHz,  $\text{CDCl}_3$ ).

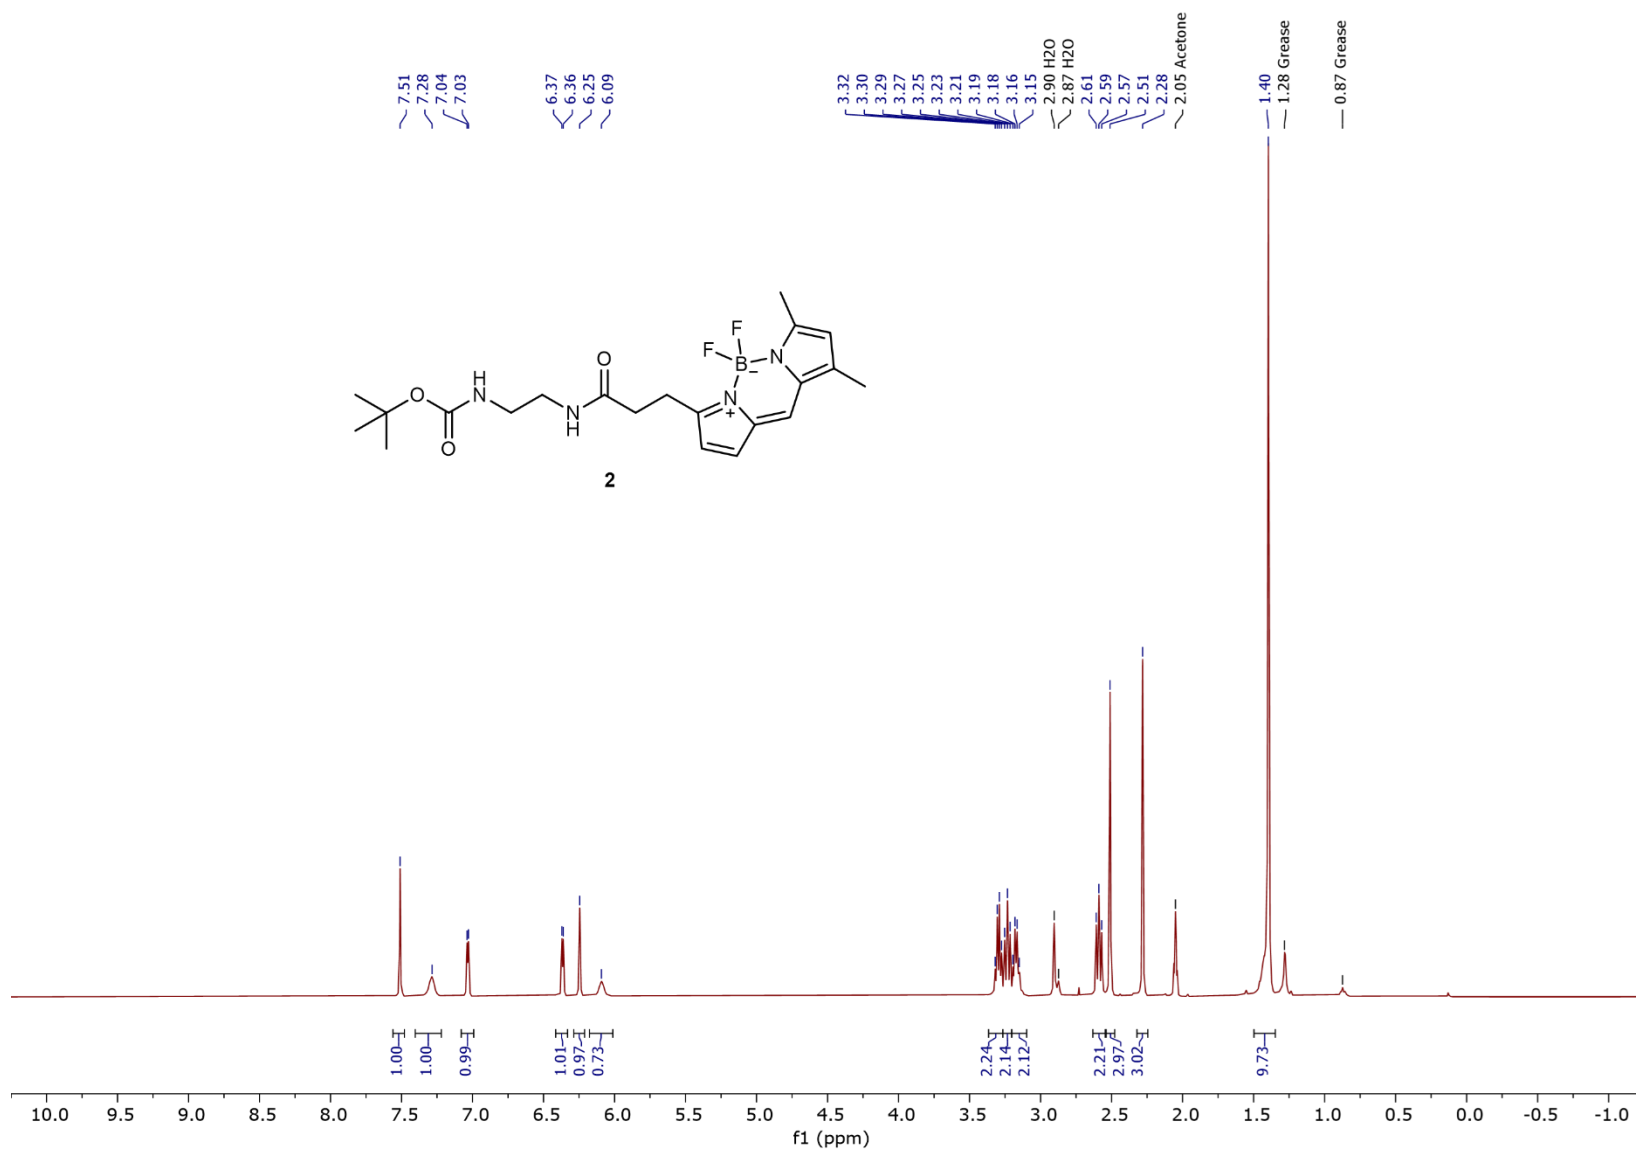

**Figure S29.** <sup>1</sup>H NMR spectrum of compound **2** (400 MHz, (CD<sub>3</sub>)<sub>2</sub>CO).

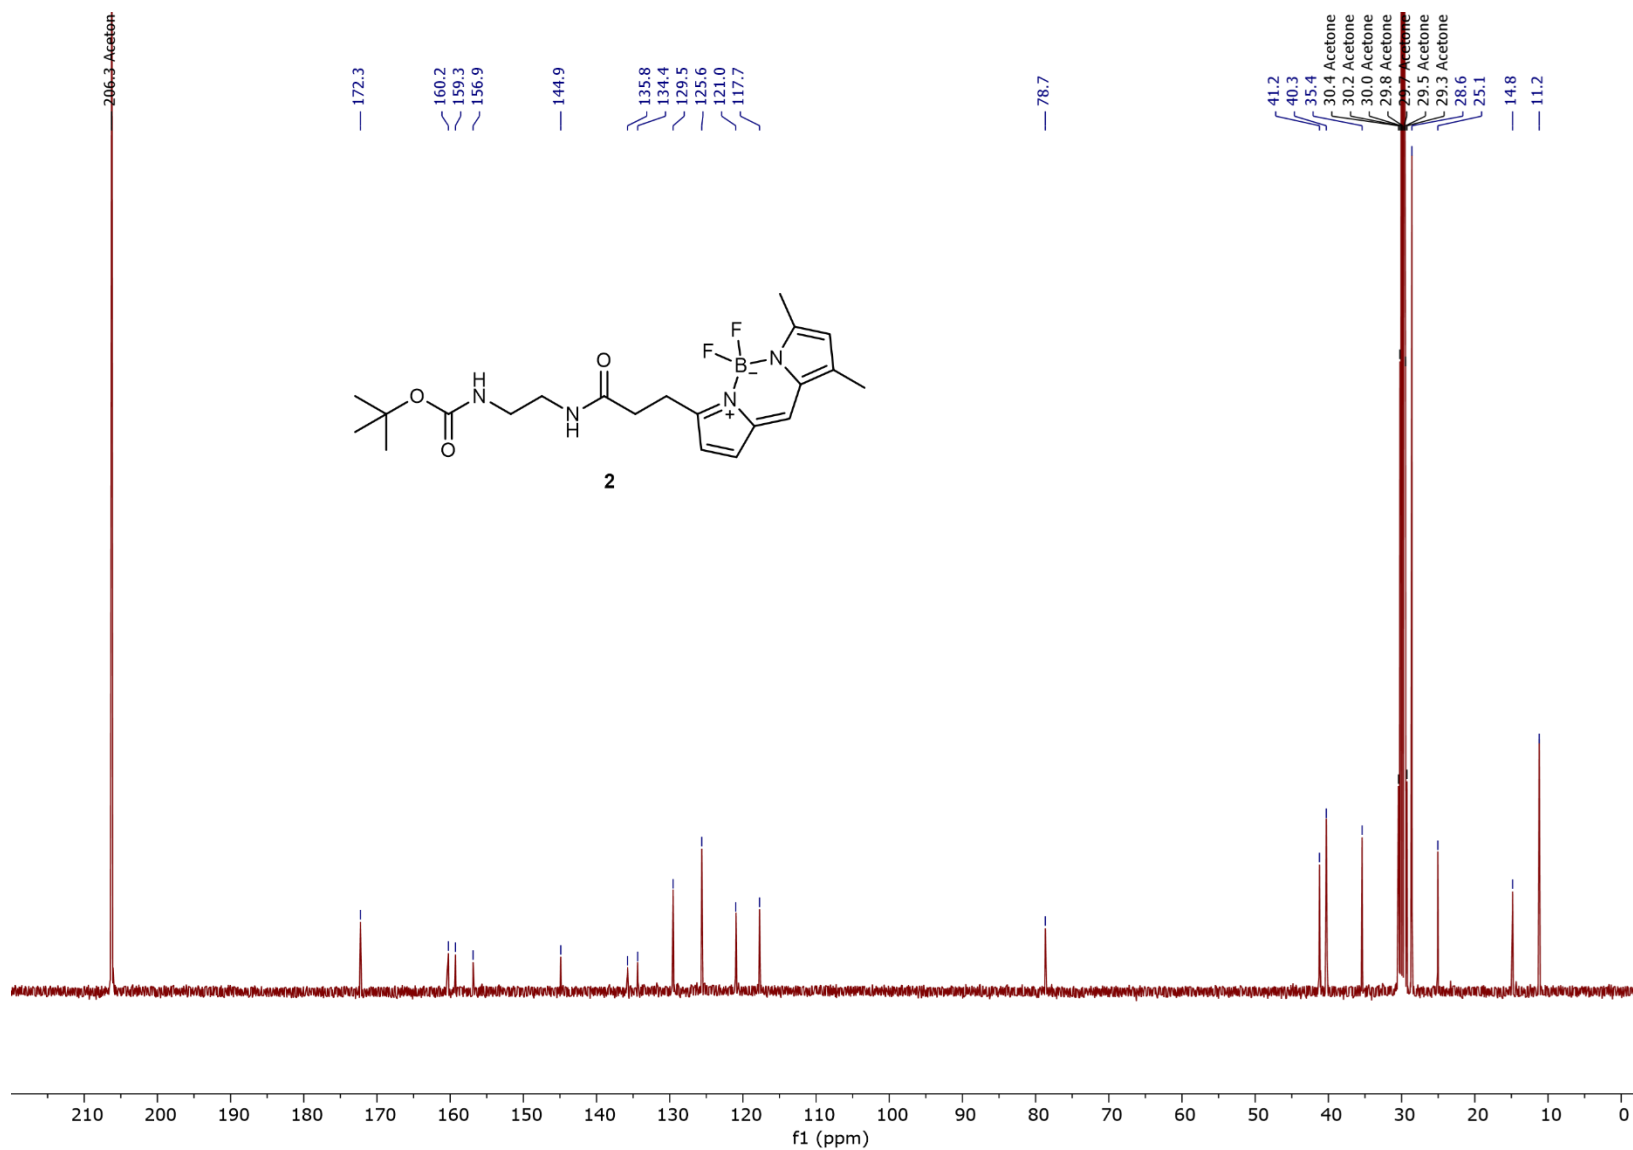

**Figure S30.**  $^{13}\text{C}\{^1\text{H}\}$  NMR spectrum of compound **2** (101 MHz,  $(\text{CD}_3)_2\text{CO}$ ).

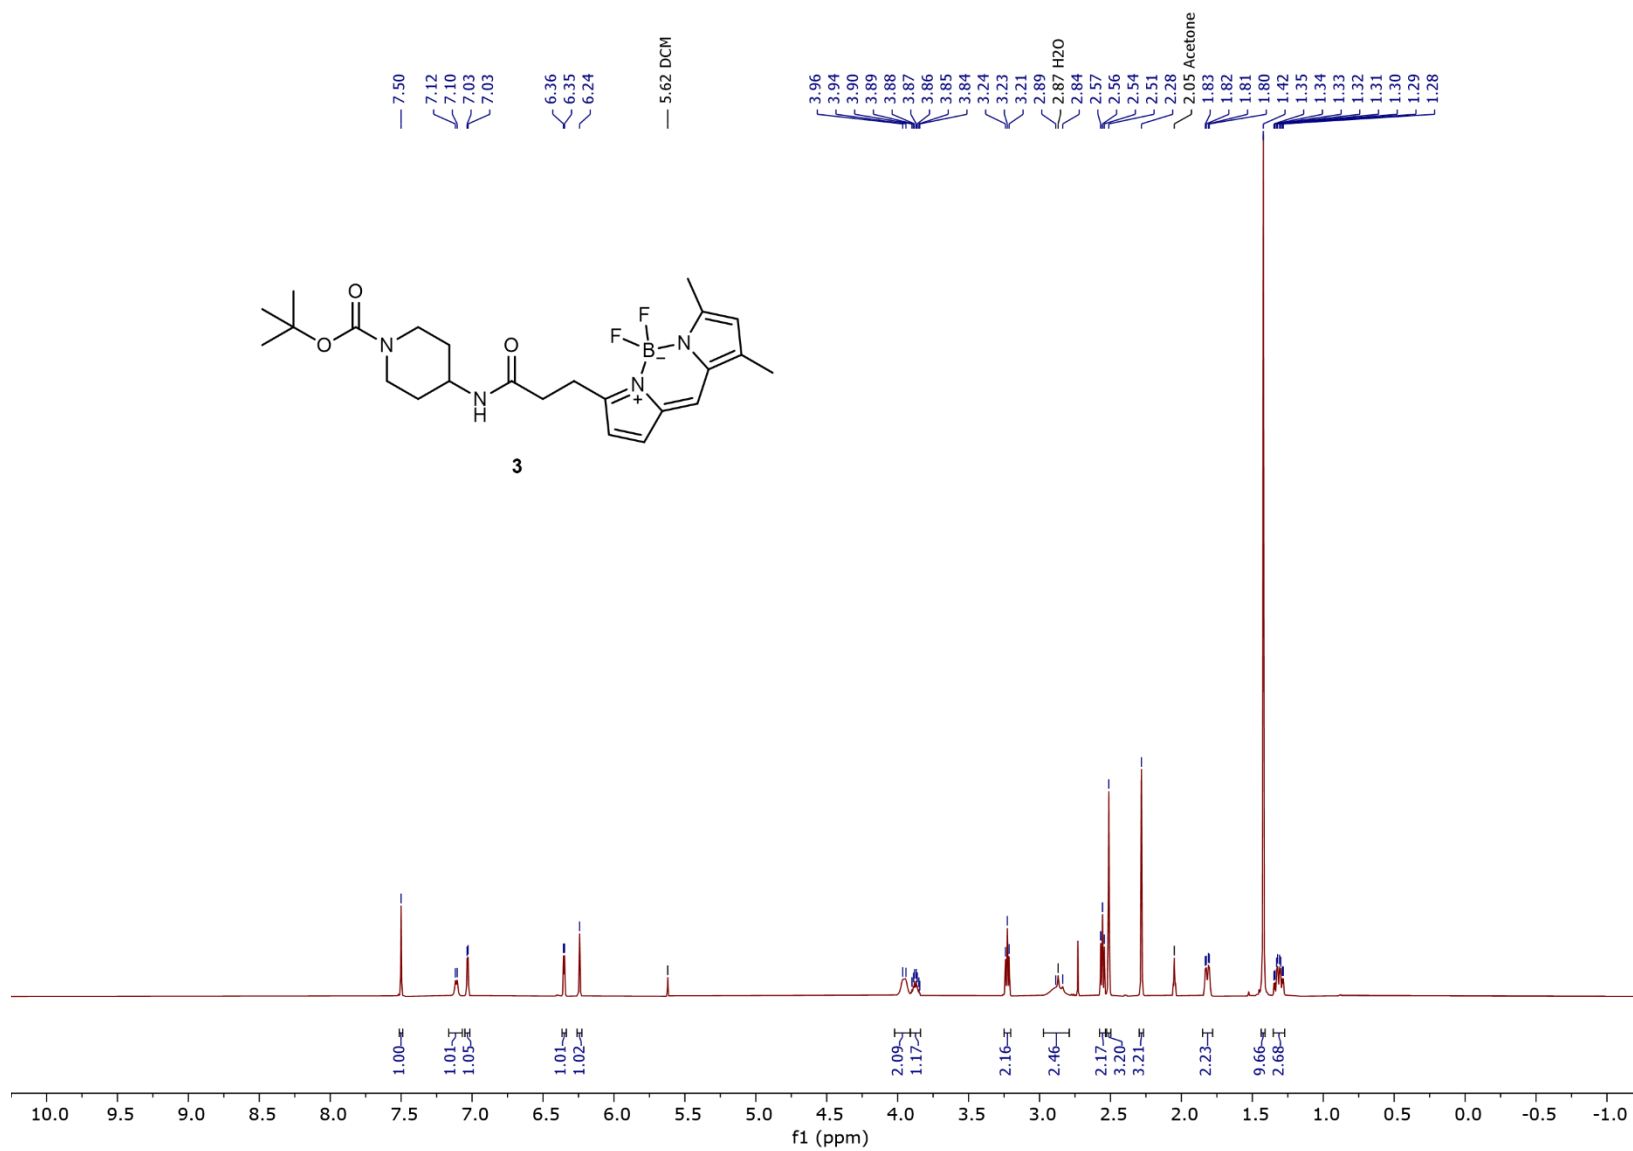

**Figure S31.** <sup>1</sup>H NMR spectrum of compound **3** (600MHz, (CD<sub>3</sub>)<sub>2</sub>CO).

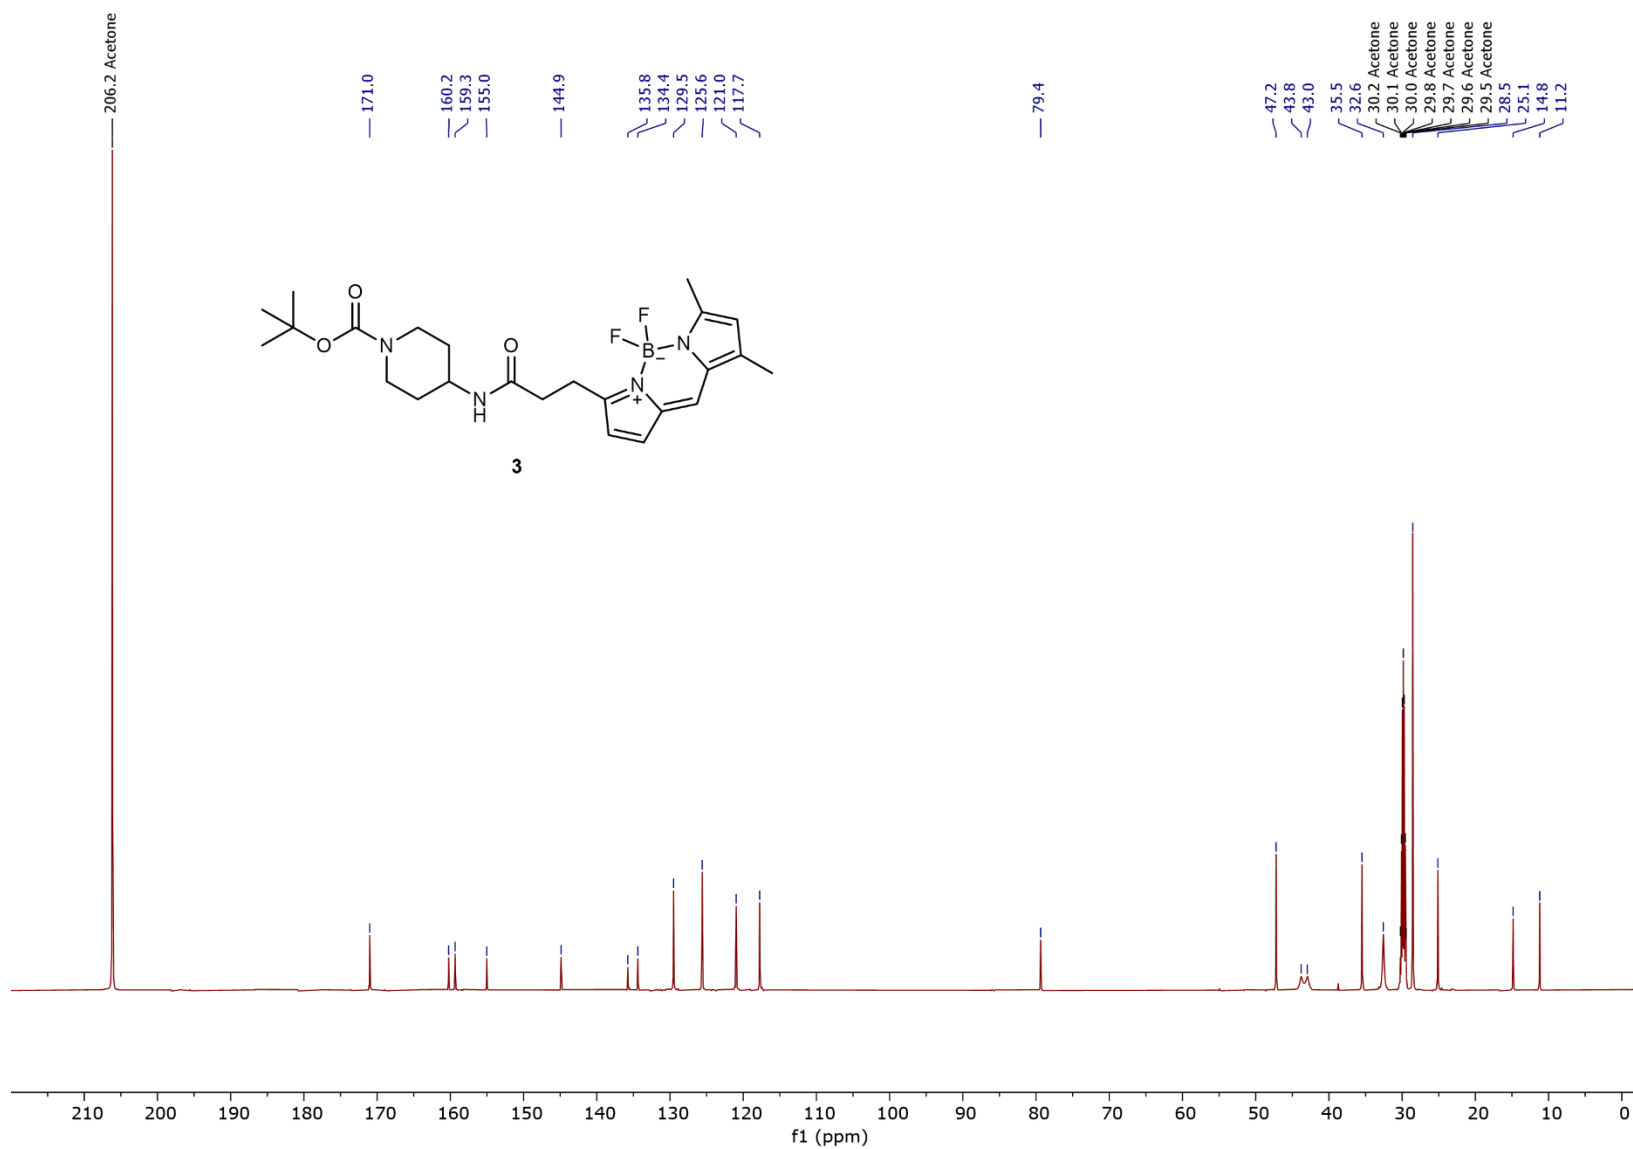

**Figure S32.**  $^{13}\text{C}\{^1\text{H}\}$  NMR spectrum of compound **3** (151 MHz,  $(\text{CD}_3)_2\text{CO}$ ).

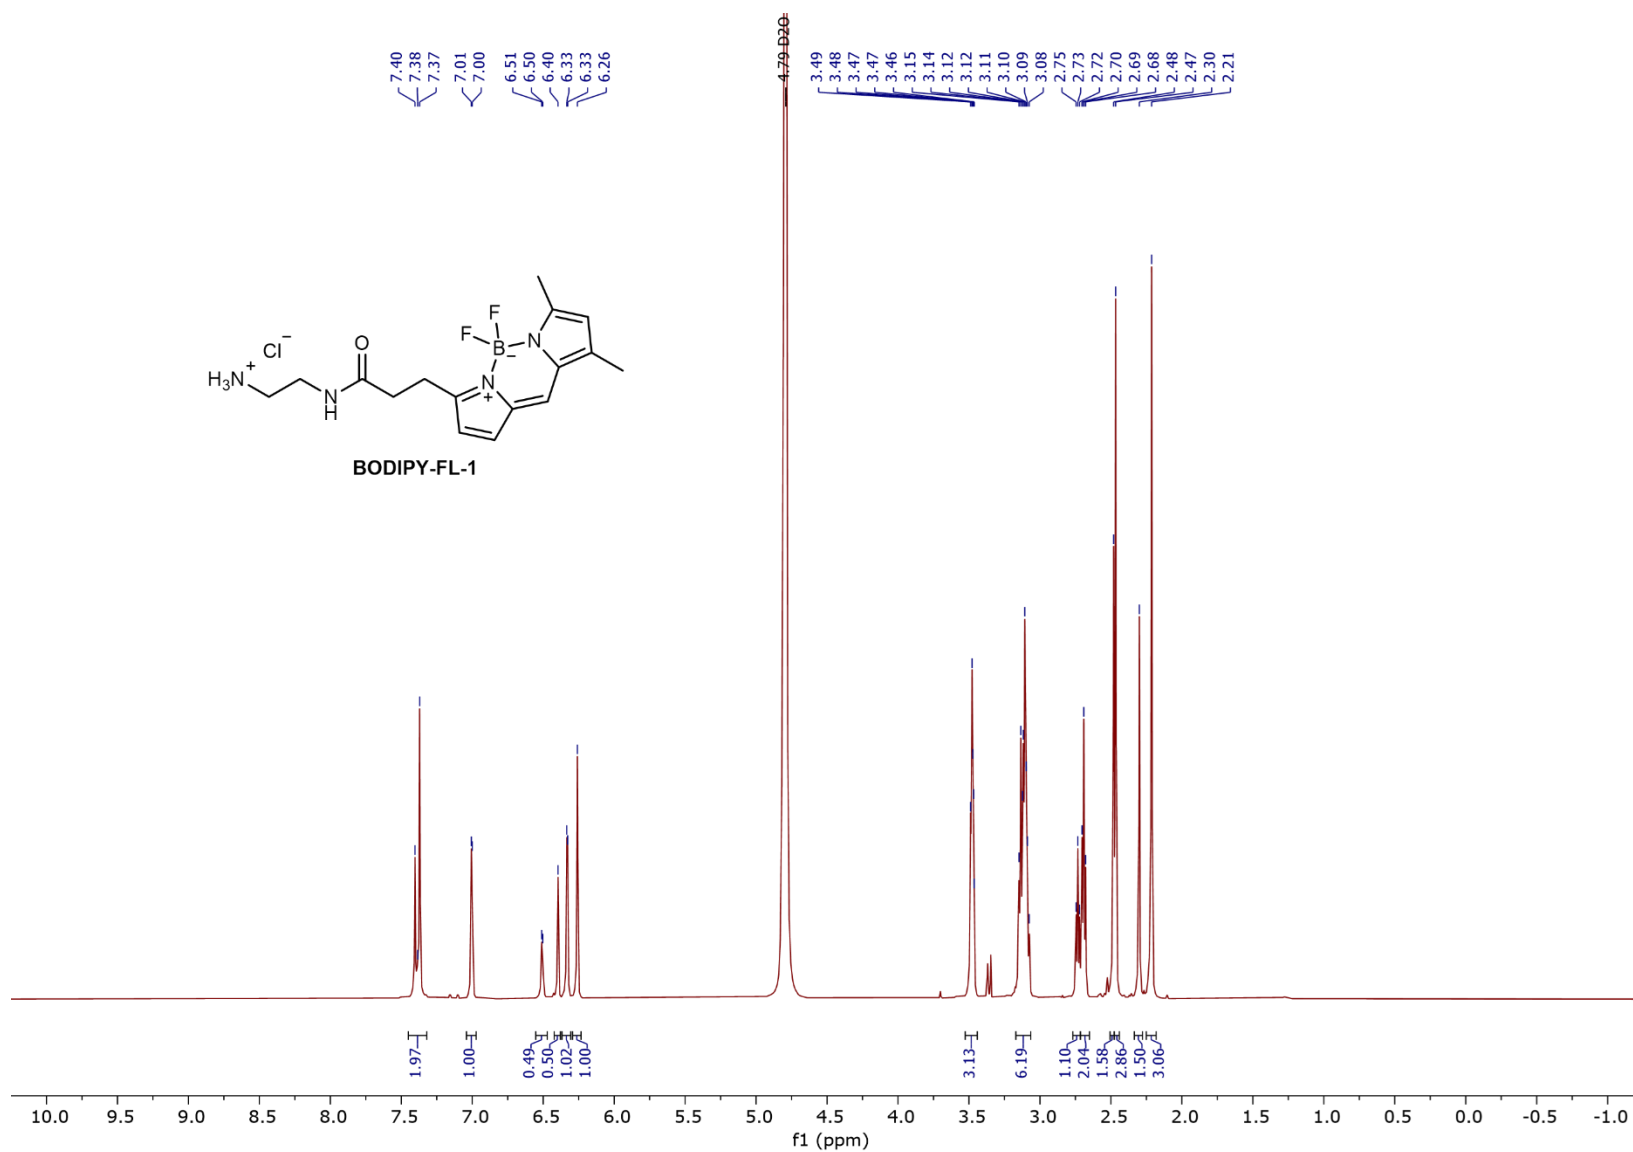

**Figure S33.** <sup>1</sup>H NMR spectrum of compound **BODIPY-FL-1** (600MHz, D<sub>2</sub>O).

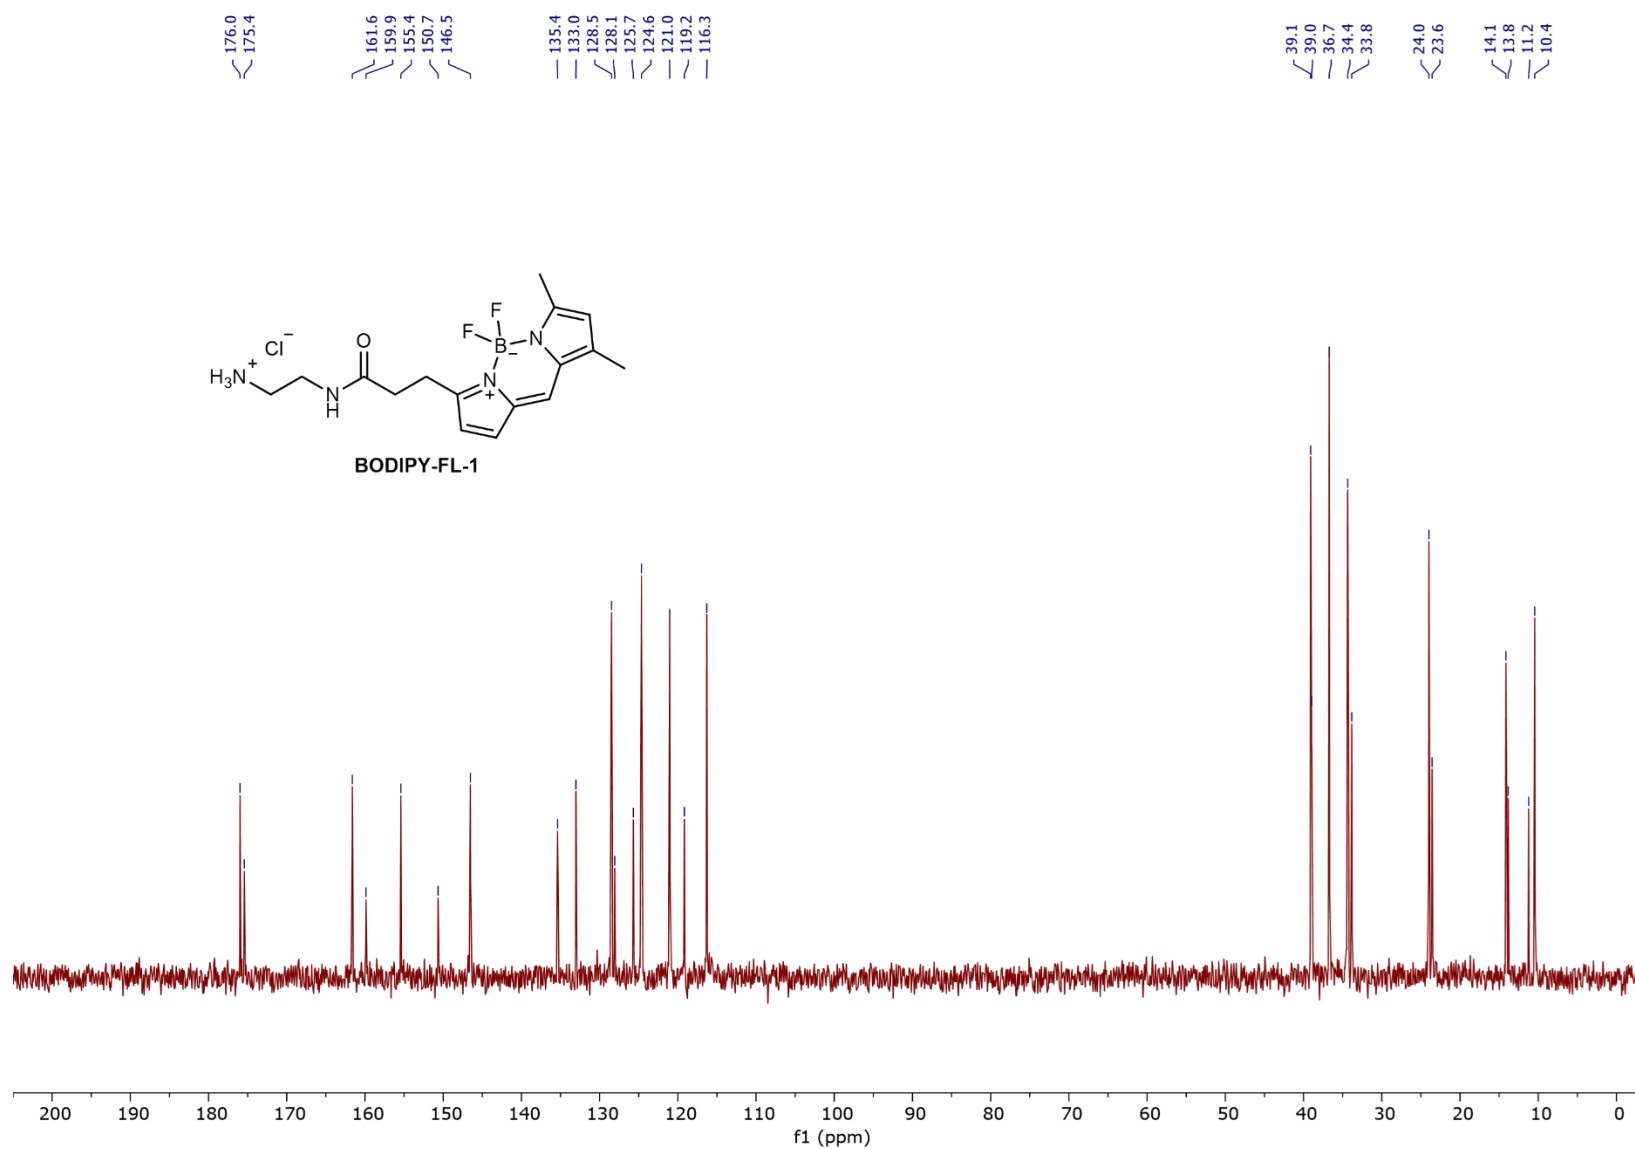

**Figure S34.**  $^{13}\text{C}\{^1\text{H}\}$  NMR spectrum of compound **BODIPY-FL-1** (151 MHz,  $\text{D}_2\text{O}$ ).

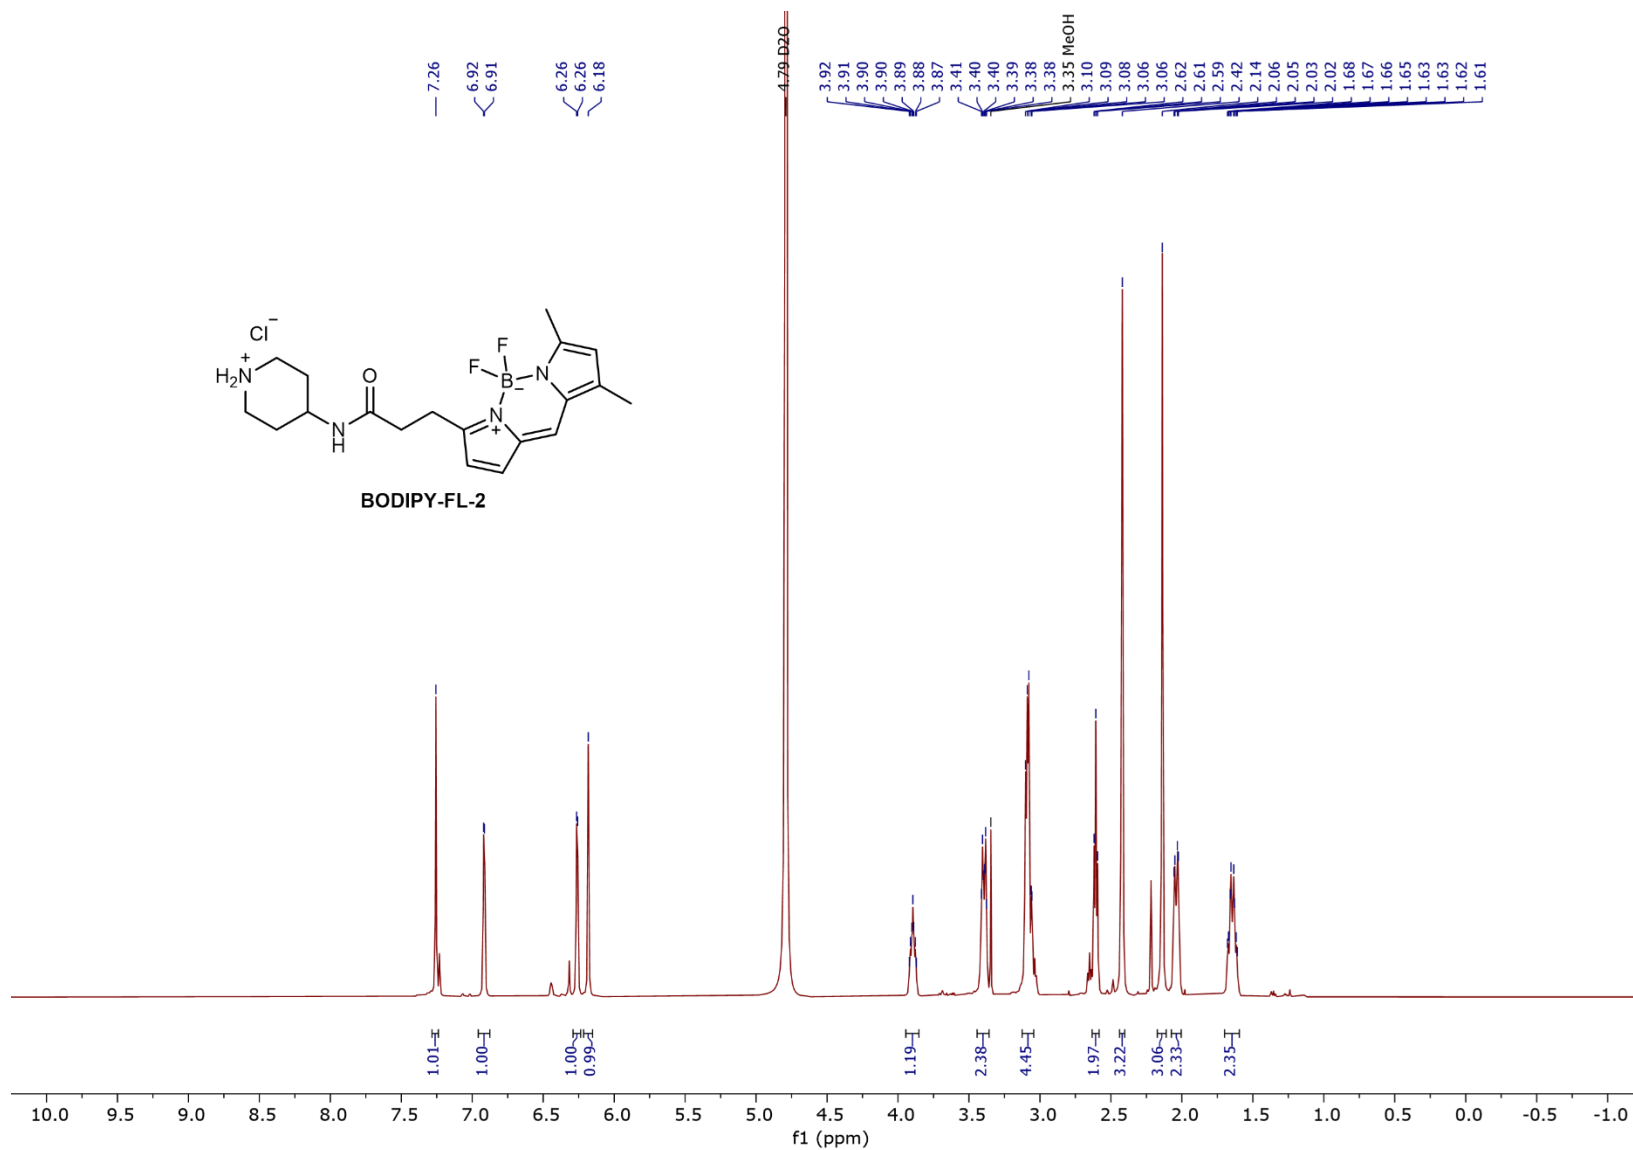

**Figure S35.** <sup>1</sup>H NMR spectrum of **BODIPY-FL-2** (600MHz, D<sub>2</sub>O).



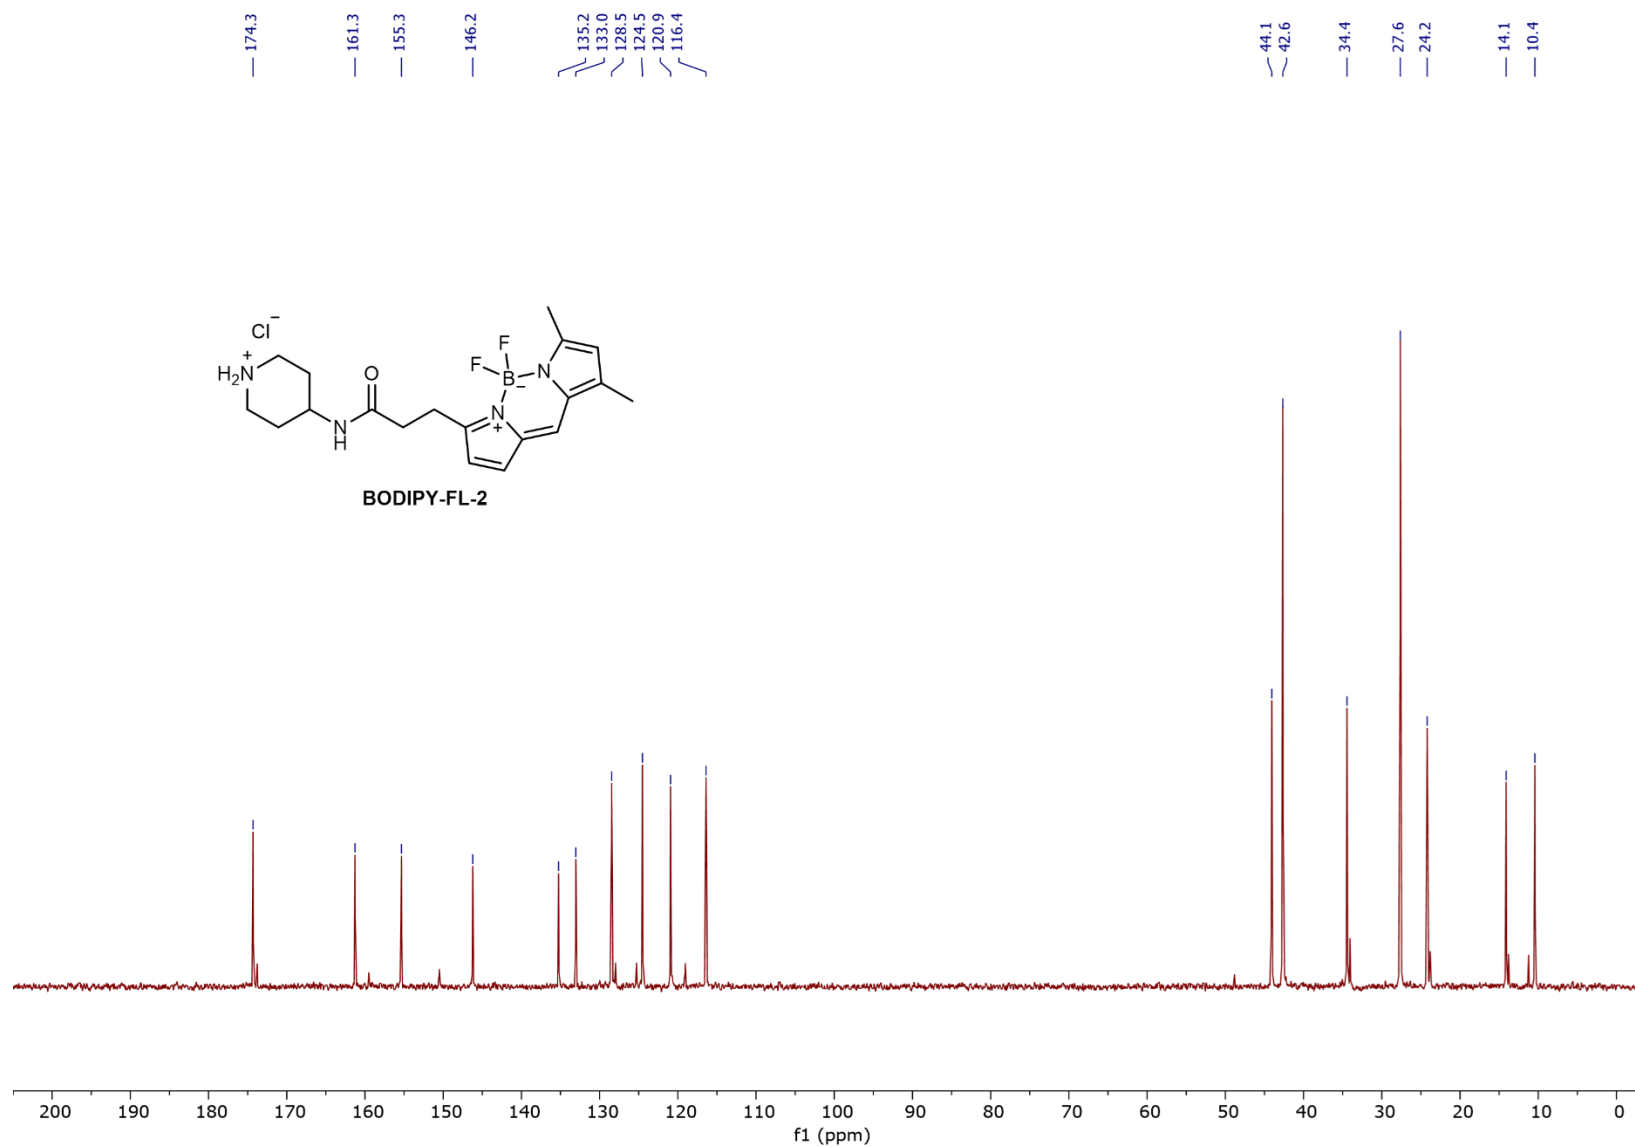

**Figure S36.**  $^{13}\text{C}\{^1\text{H}\}$  NMR spectrum of **BODIPY-FL-2** (151 MHz,  $\text{D}_2\text{O}$ ).

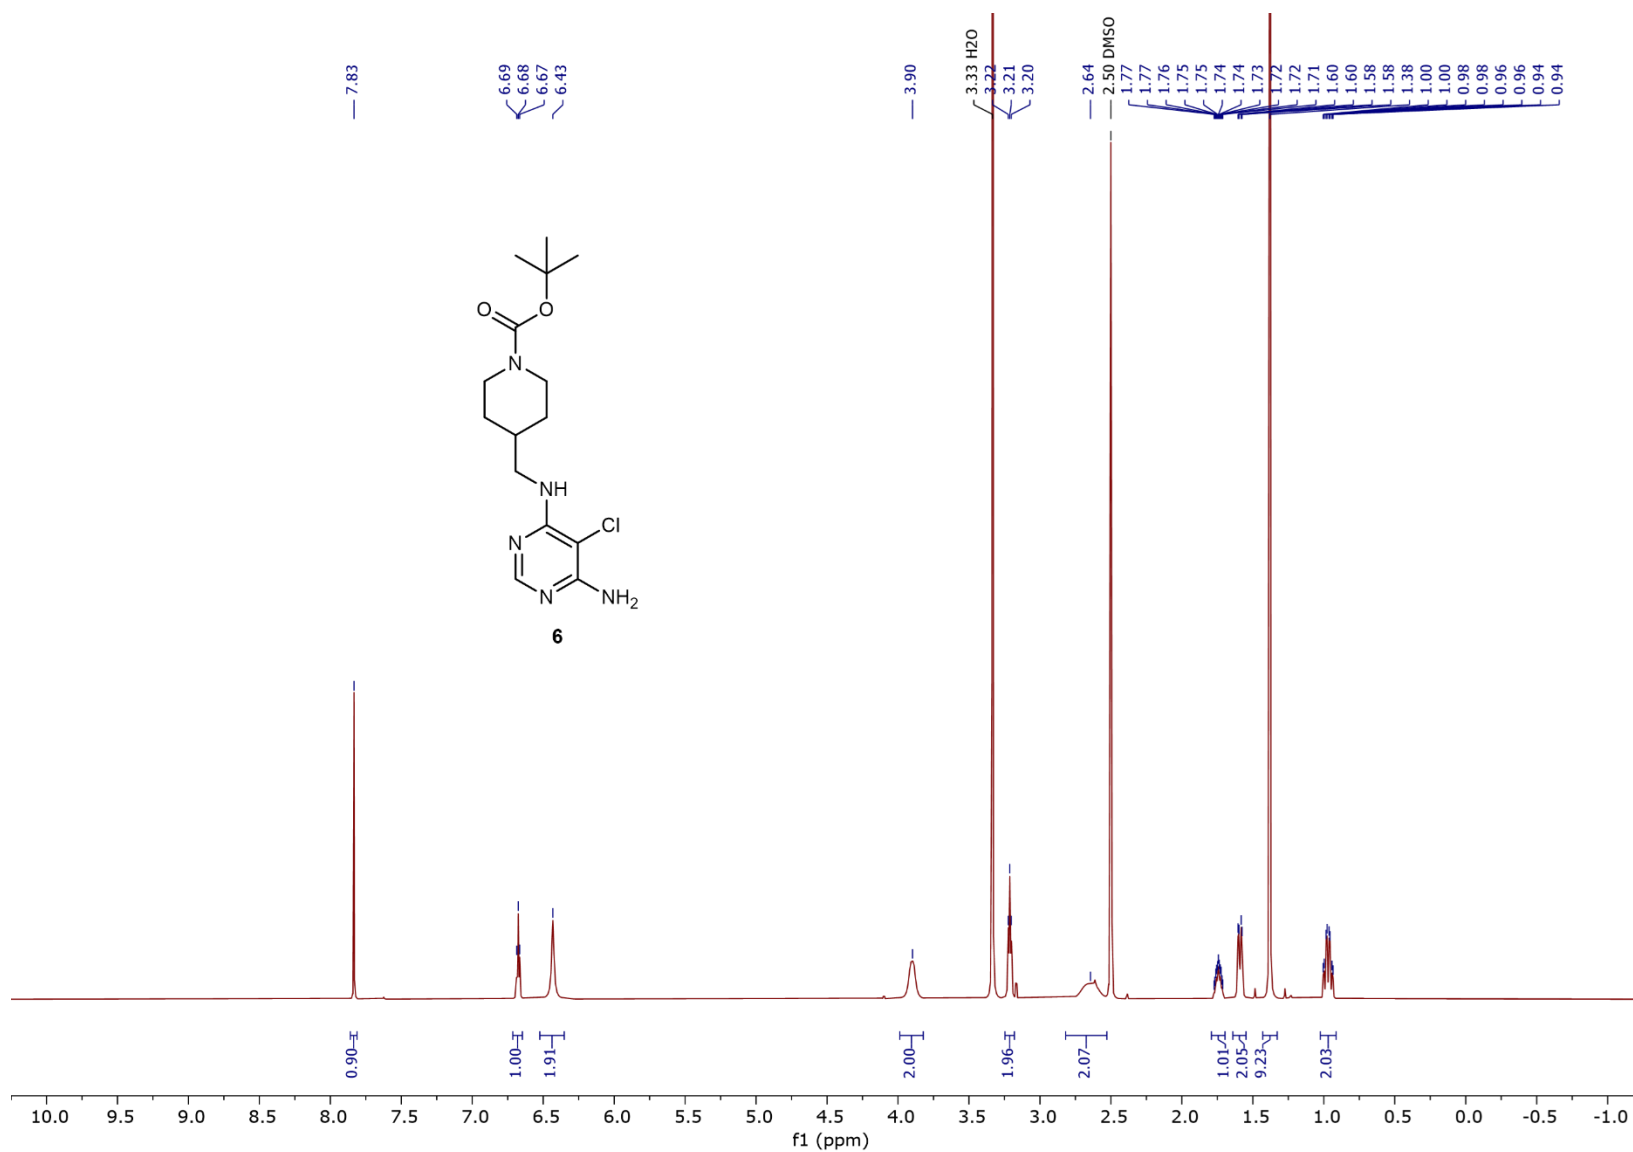

**Figure S37.** <sup>1</sup>H NMR spectrum of compound **6** (600MHz, (CD<sub>3</sub>)<sub>2</sub>SO).

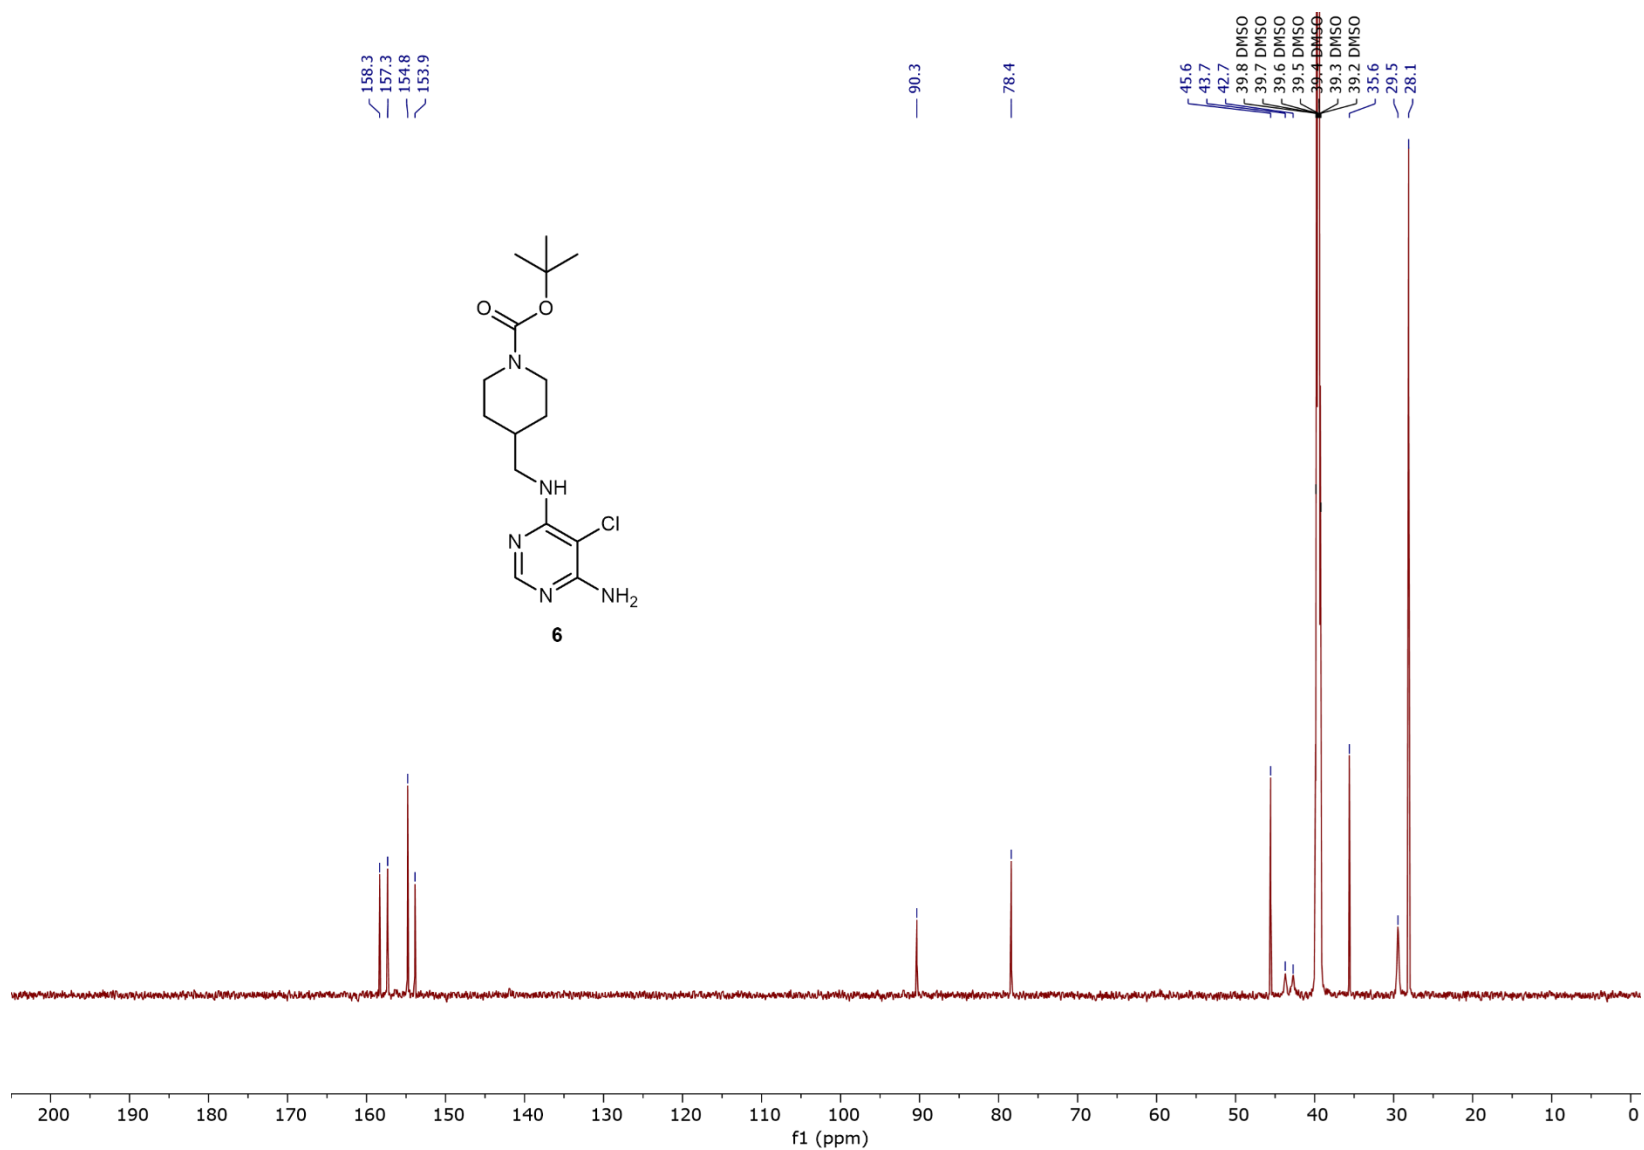

**Figure S38.**  $^{13}\text{C}\{^1\text{H}\}$  NMR spectrum of compound **6** (201 MHz,  $(\text{CD}_3)_2\text{SO}$ ).

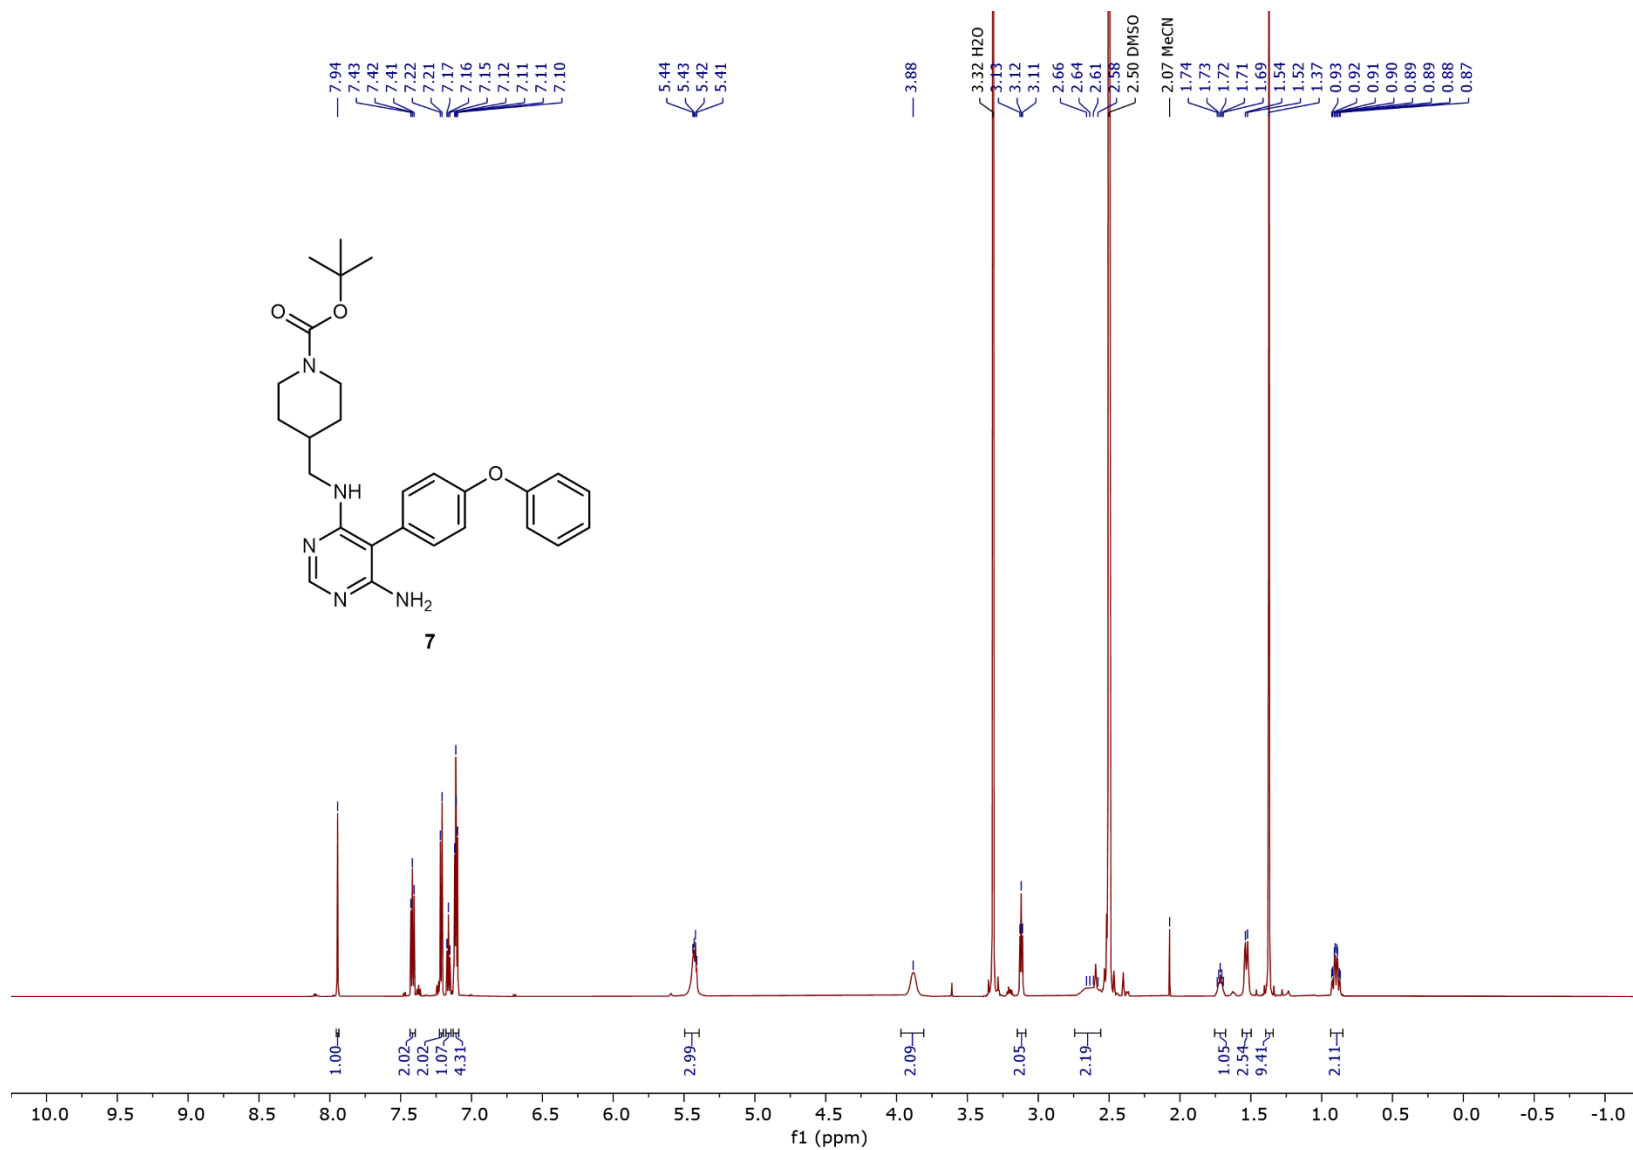

Figure S39. <sup>1</sup>H NMR spectrum of compound 7 (700MHz, (CD<sub>3</sub>)<sub>2</sub>SO).

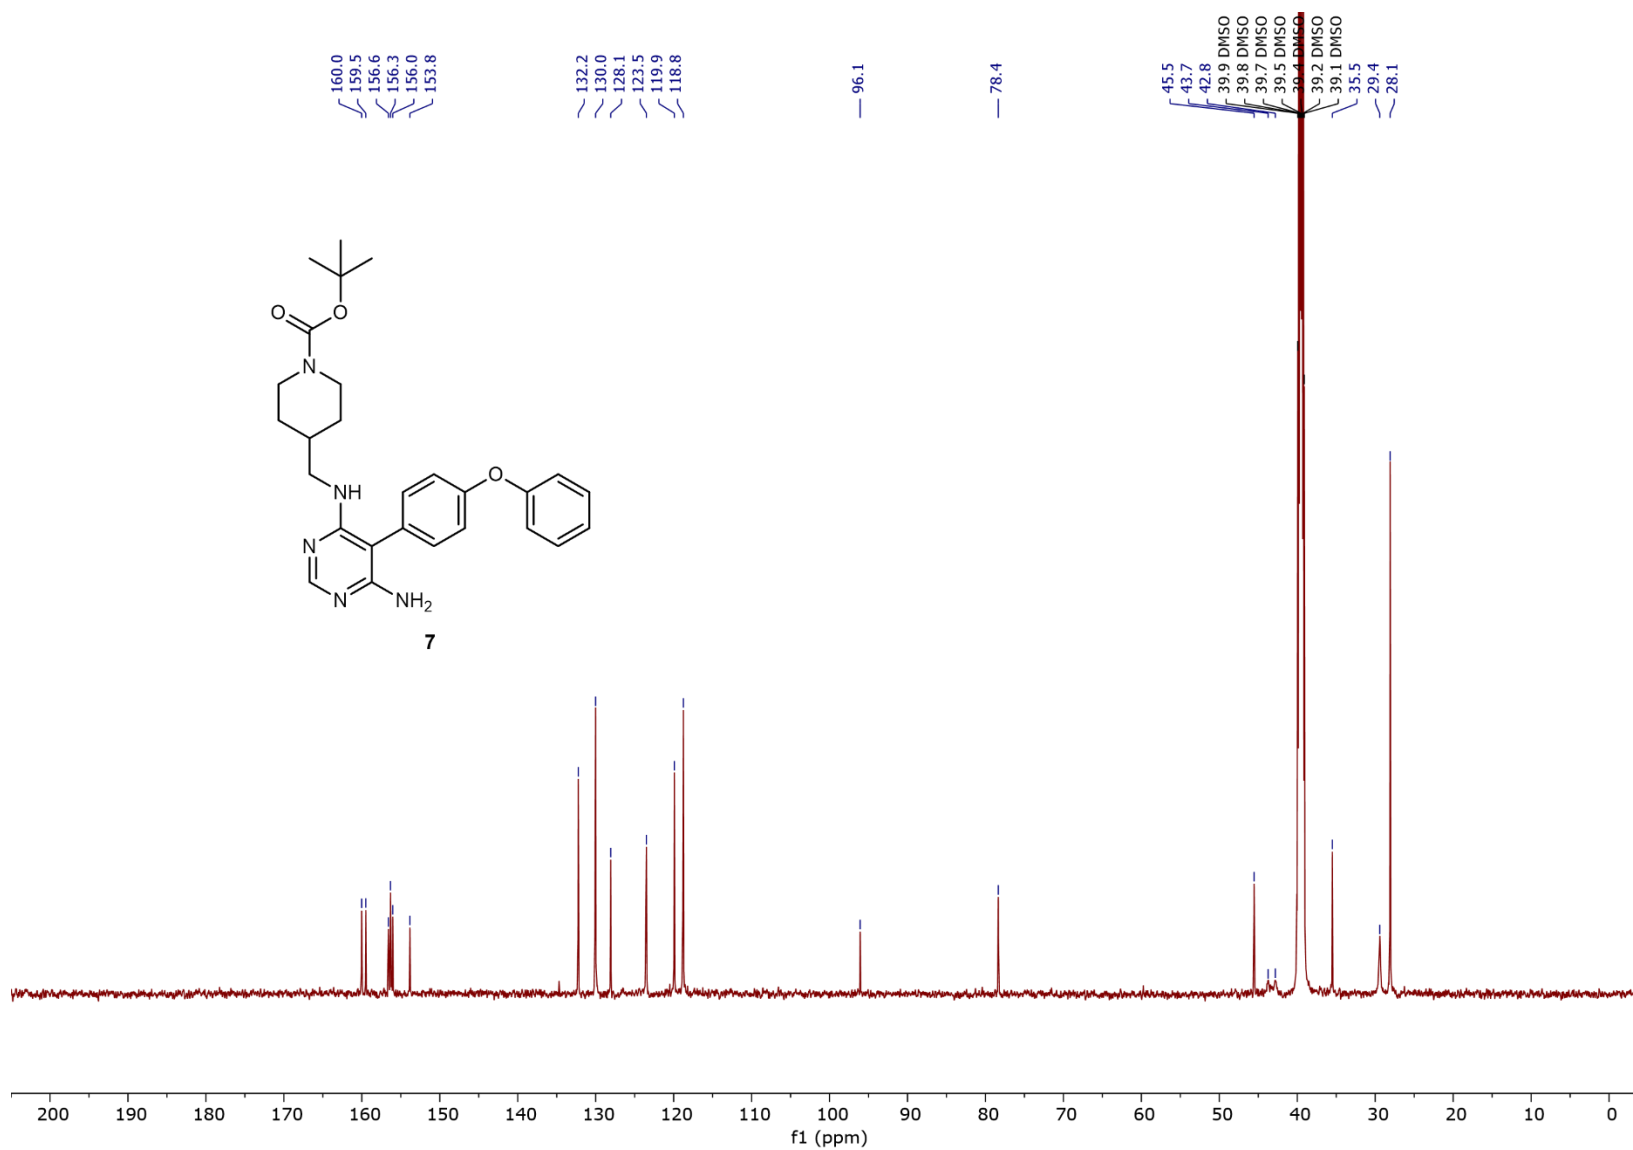

Figure S40. <sup>13</sup>C{<sup>1</sup>H} NMR spectrum of compound 7 (151 MHz, (CD<sub>3</sub>)<sub>2</sub>SO).

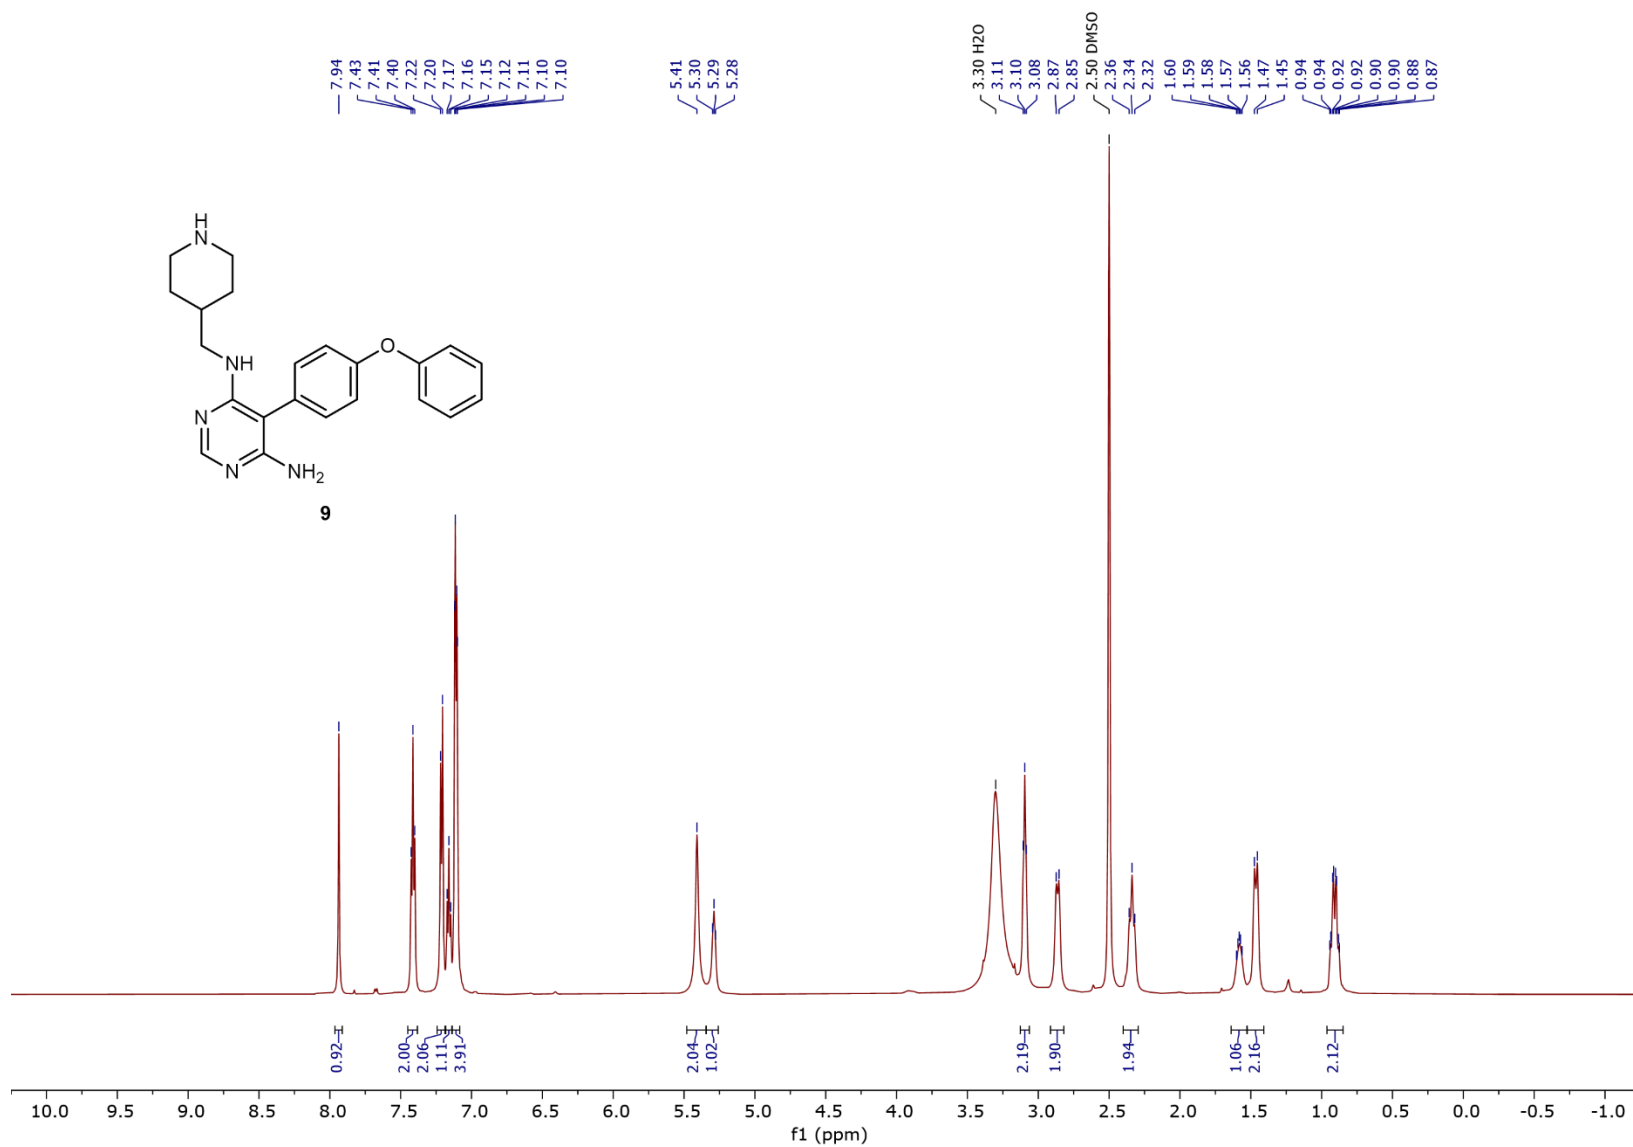

**Figure S41.**  $^1\text{H}$  NMR spectrum of compound **9** (600MHz,  $(\text{CD}_3)_2\text{SO}$ ).

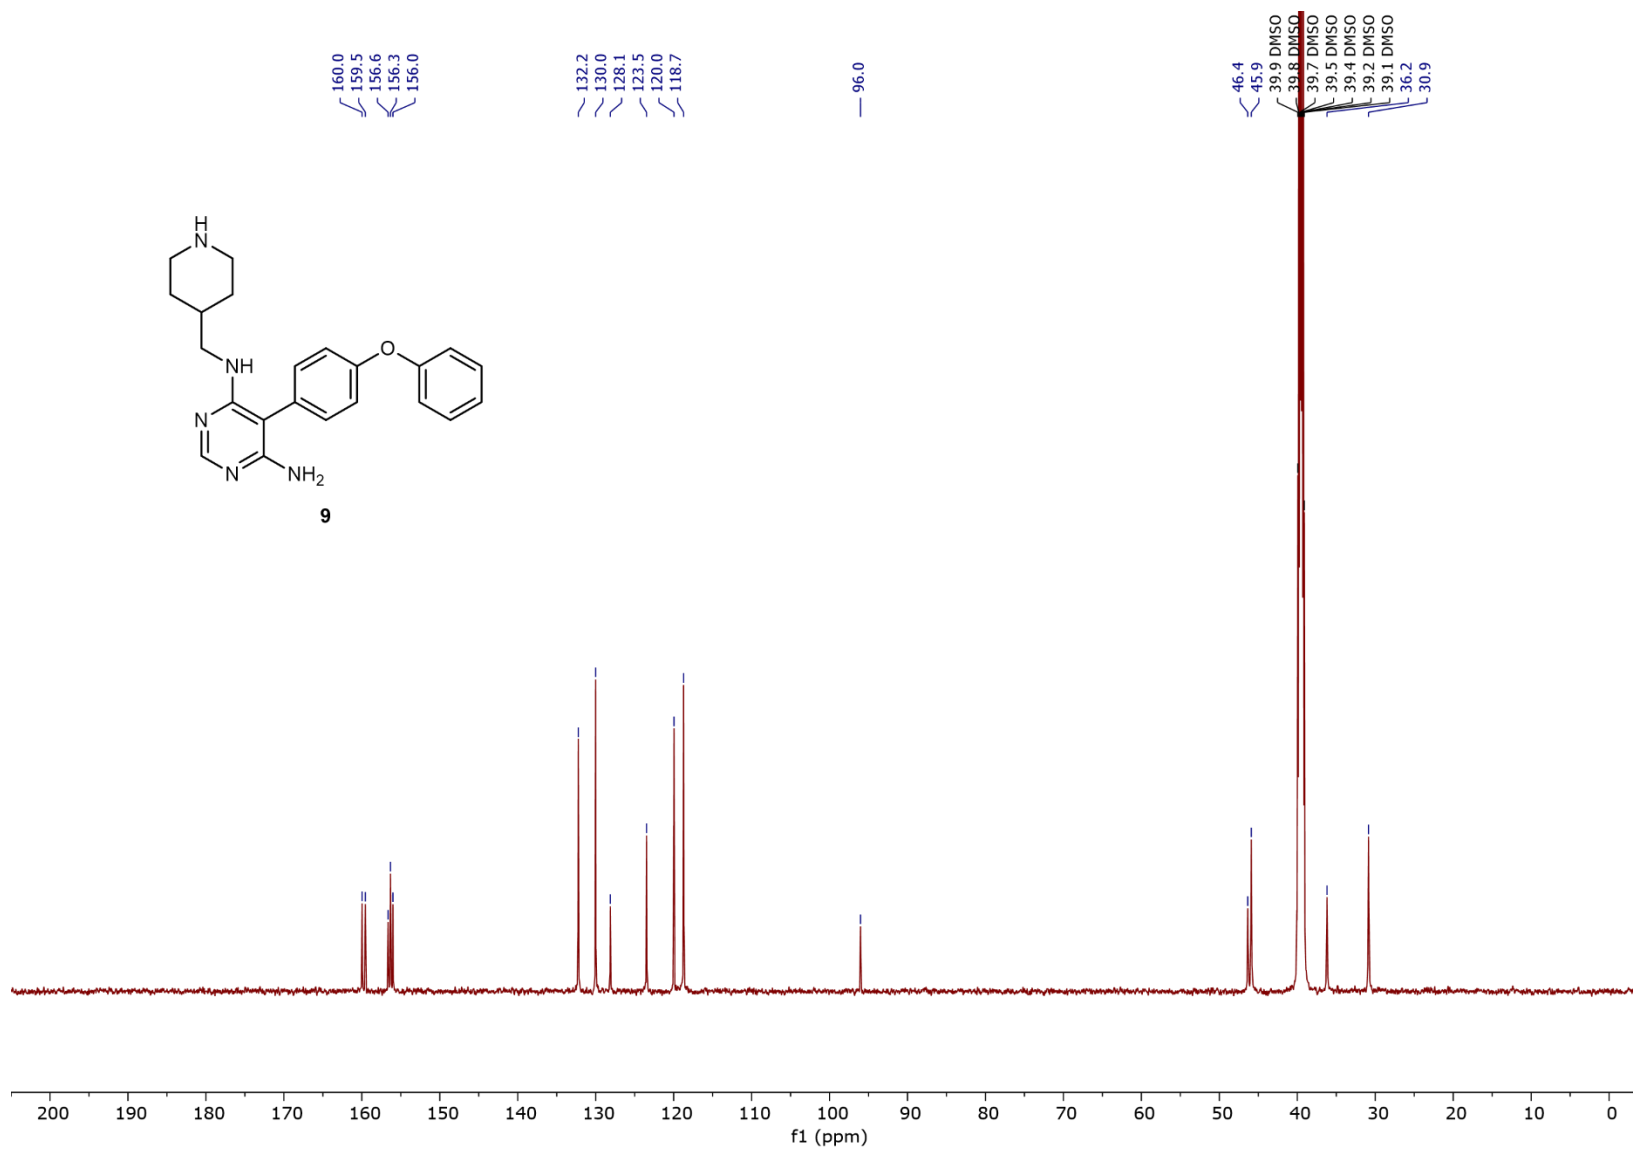

**Figure S42.**  $^{13}\text{C}\{^1\text{H}\}$  NMR spectrum of compound **9** (151 MHz,  $(\text{CD}_3)_2\text{SO}$ ).

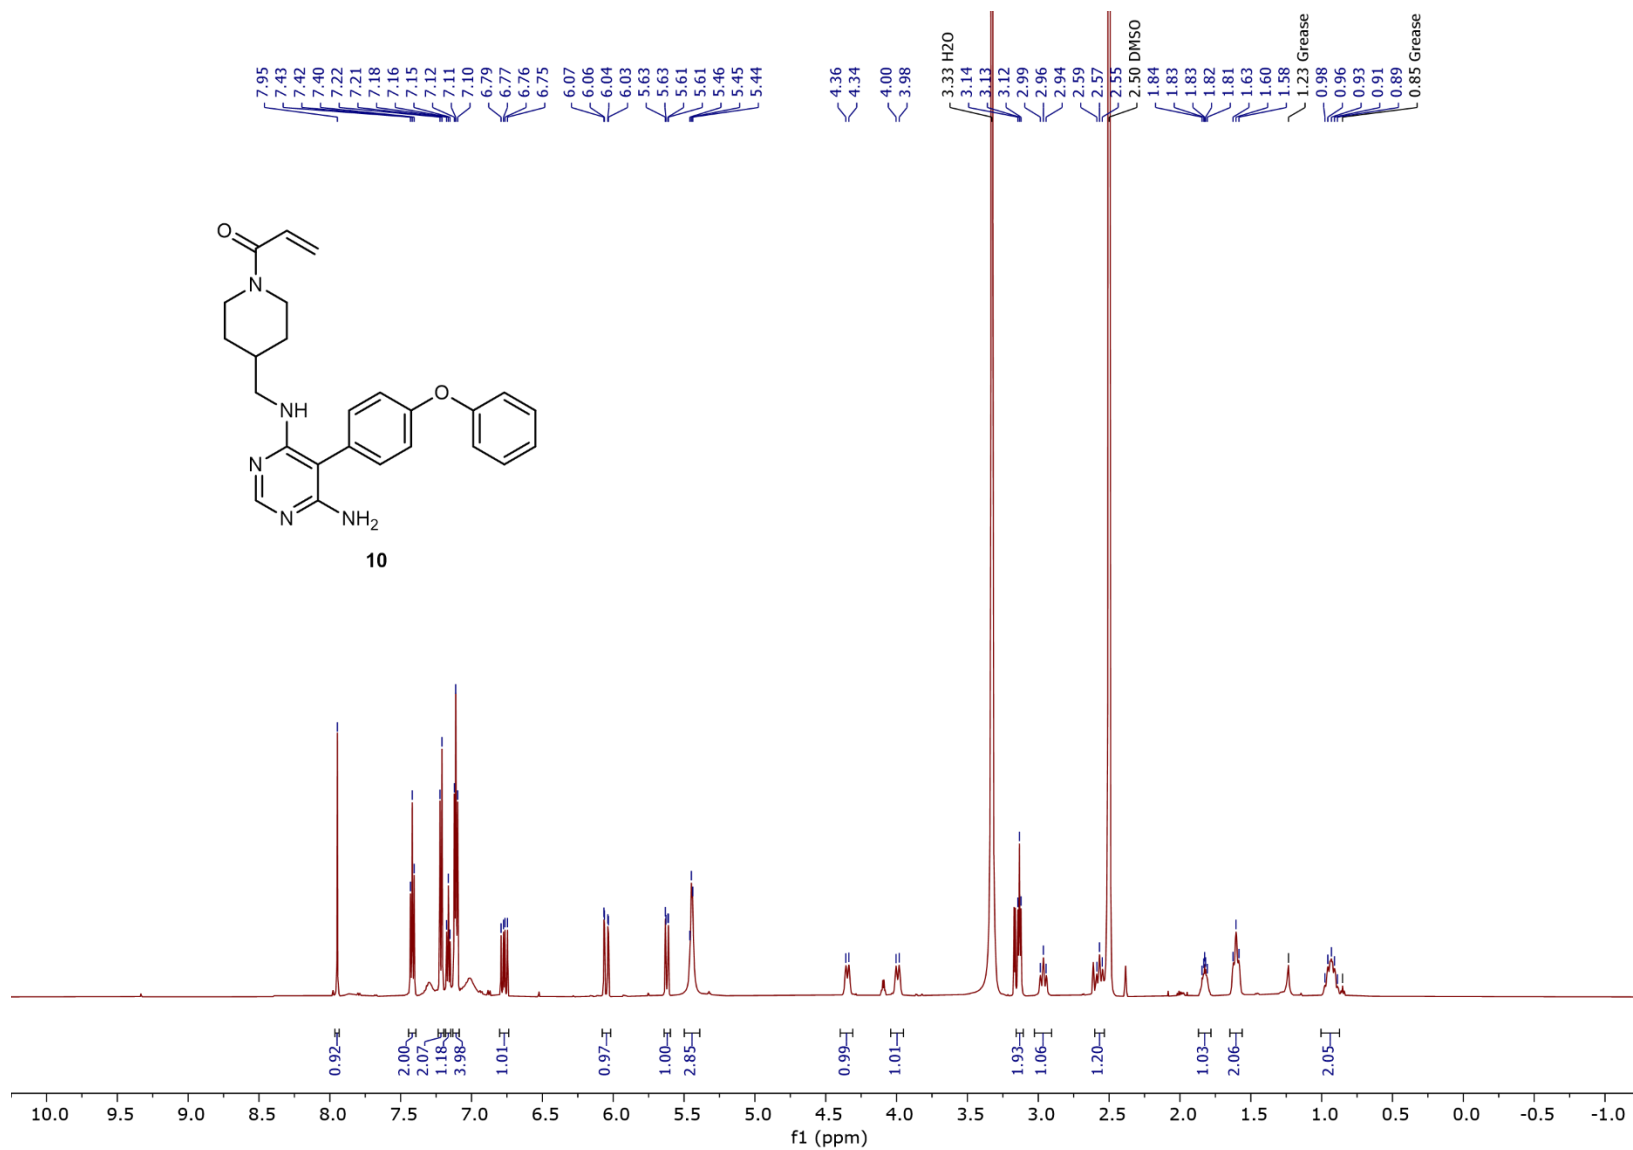

**Figure S43.**  $^1H$  NMR spectrum of compound **10** (600MHz,  $(CD_3)_2SO$ ).



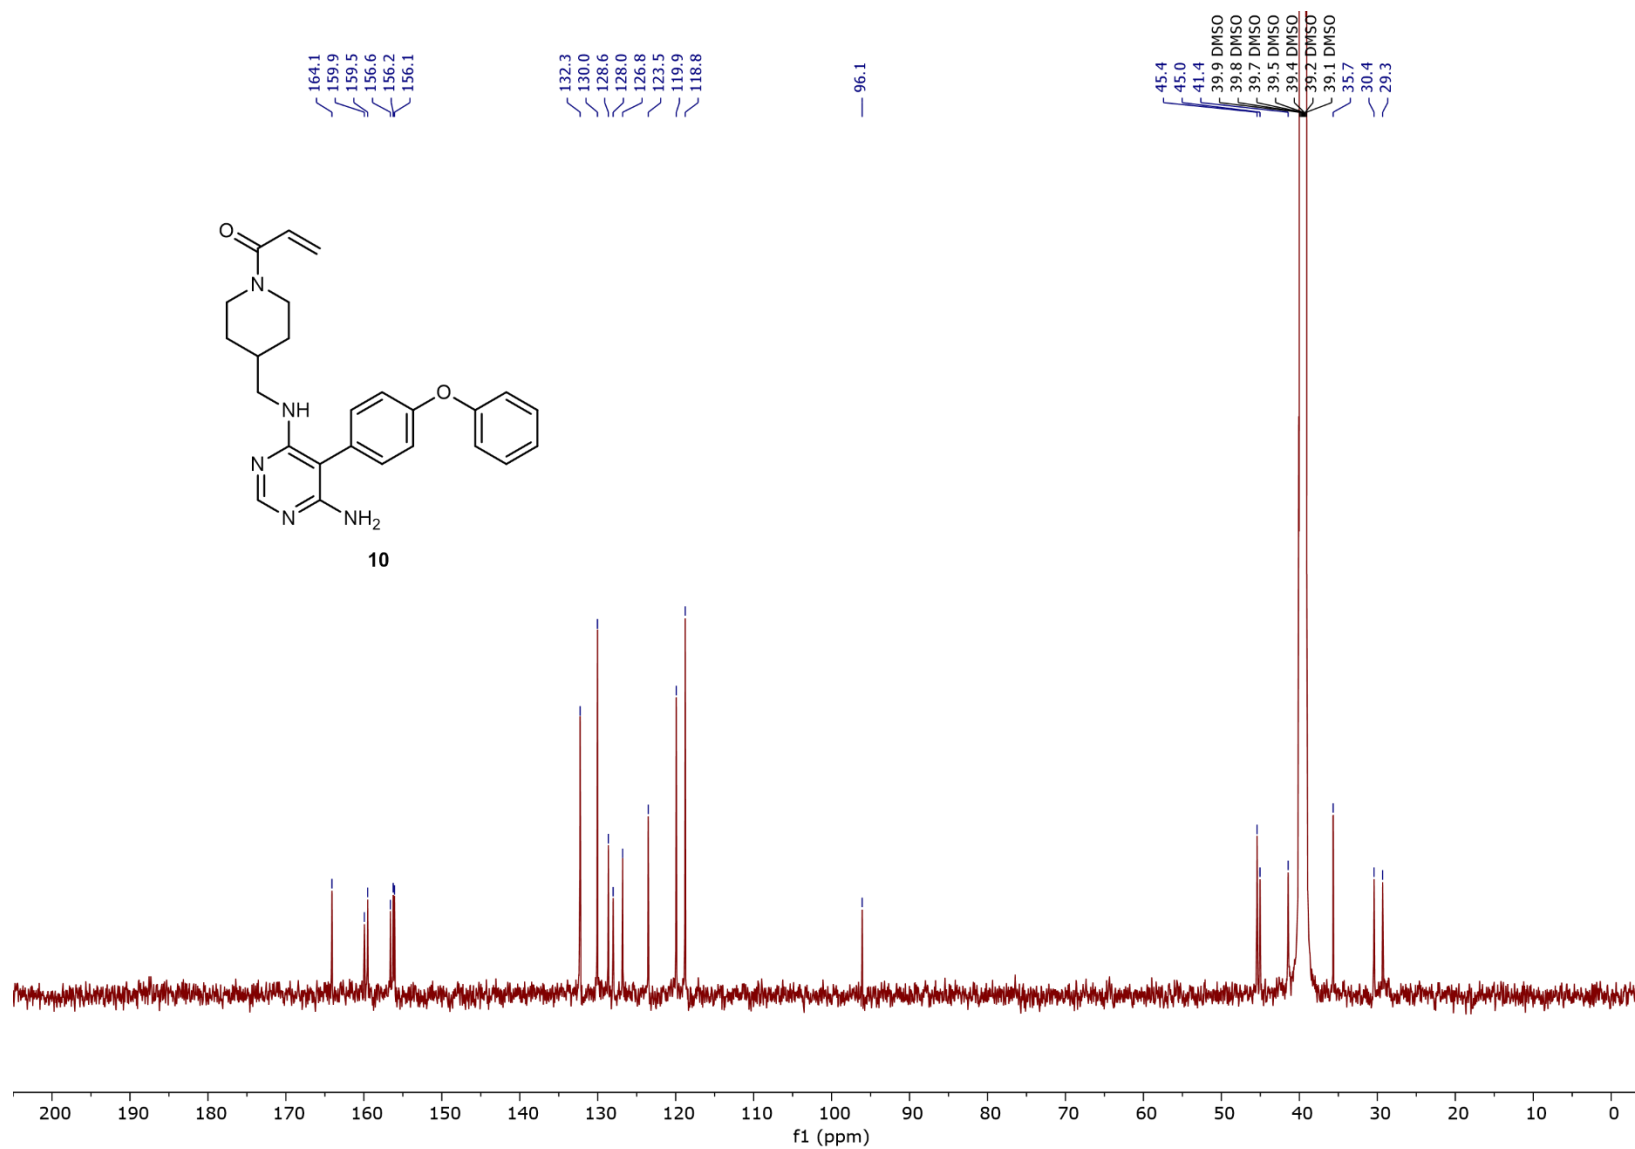

**Figure S44.**  $^{13}\text{C}\{^1\text{H}\}$  NMR spectrum of compound **10** (151 MHz,  $(\text{CD}_3)_2\text{SO}$ ).

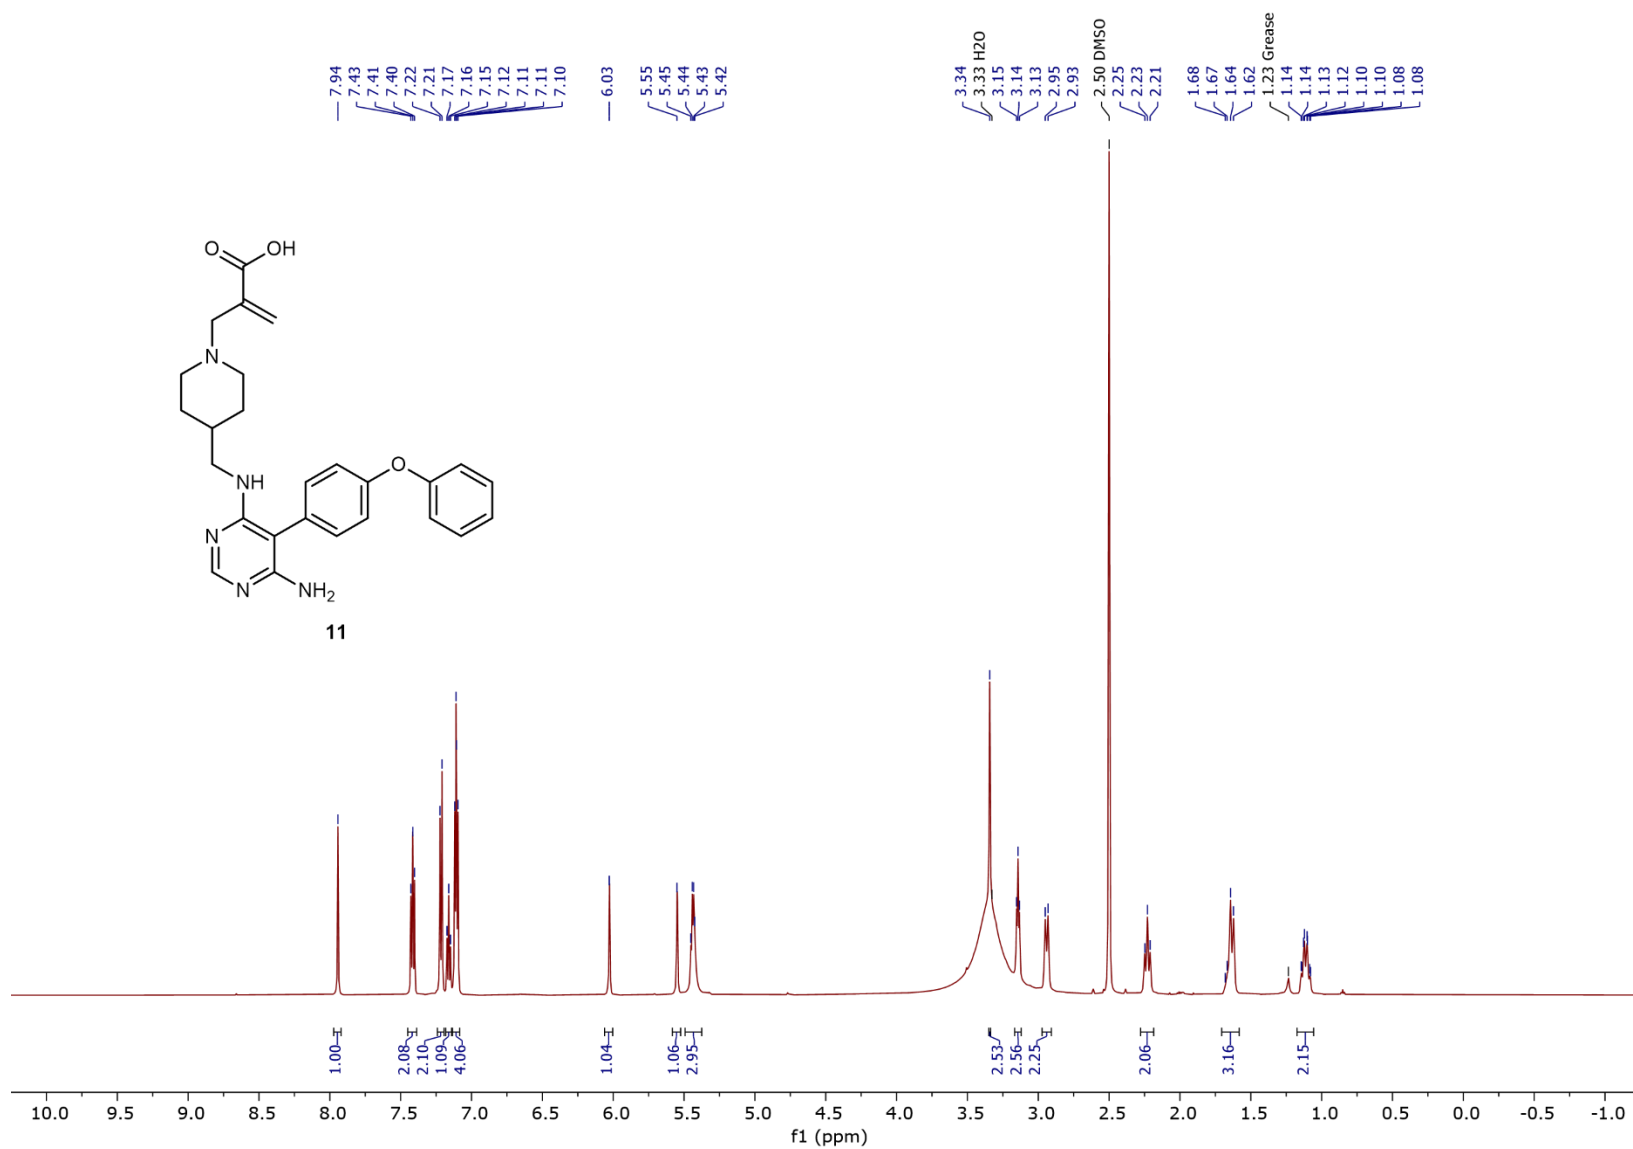

**Figure S45.**  $^1H$  NMR spectrum of compound **11** (600MHz,  $(CD_3)_2SO$ ).

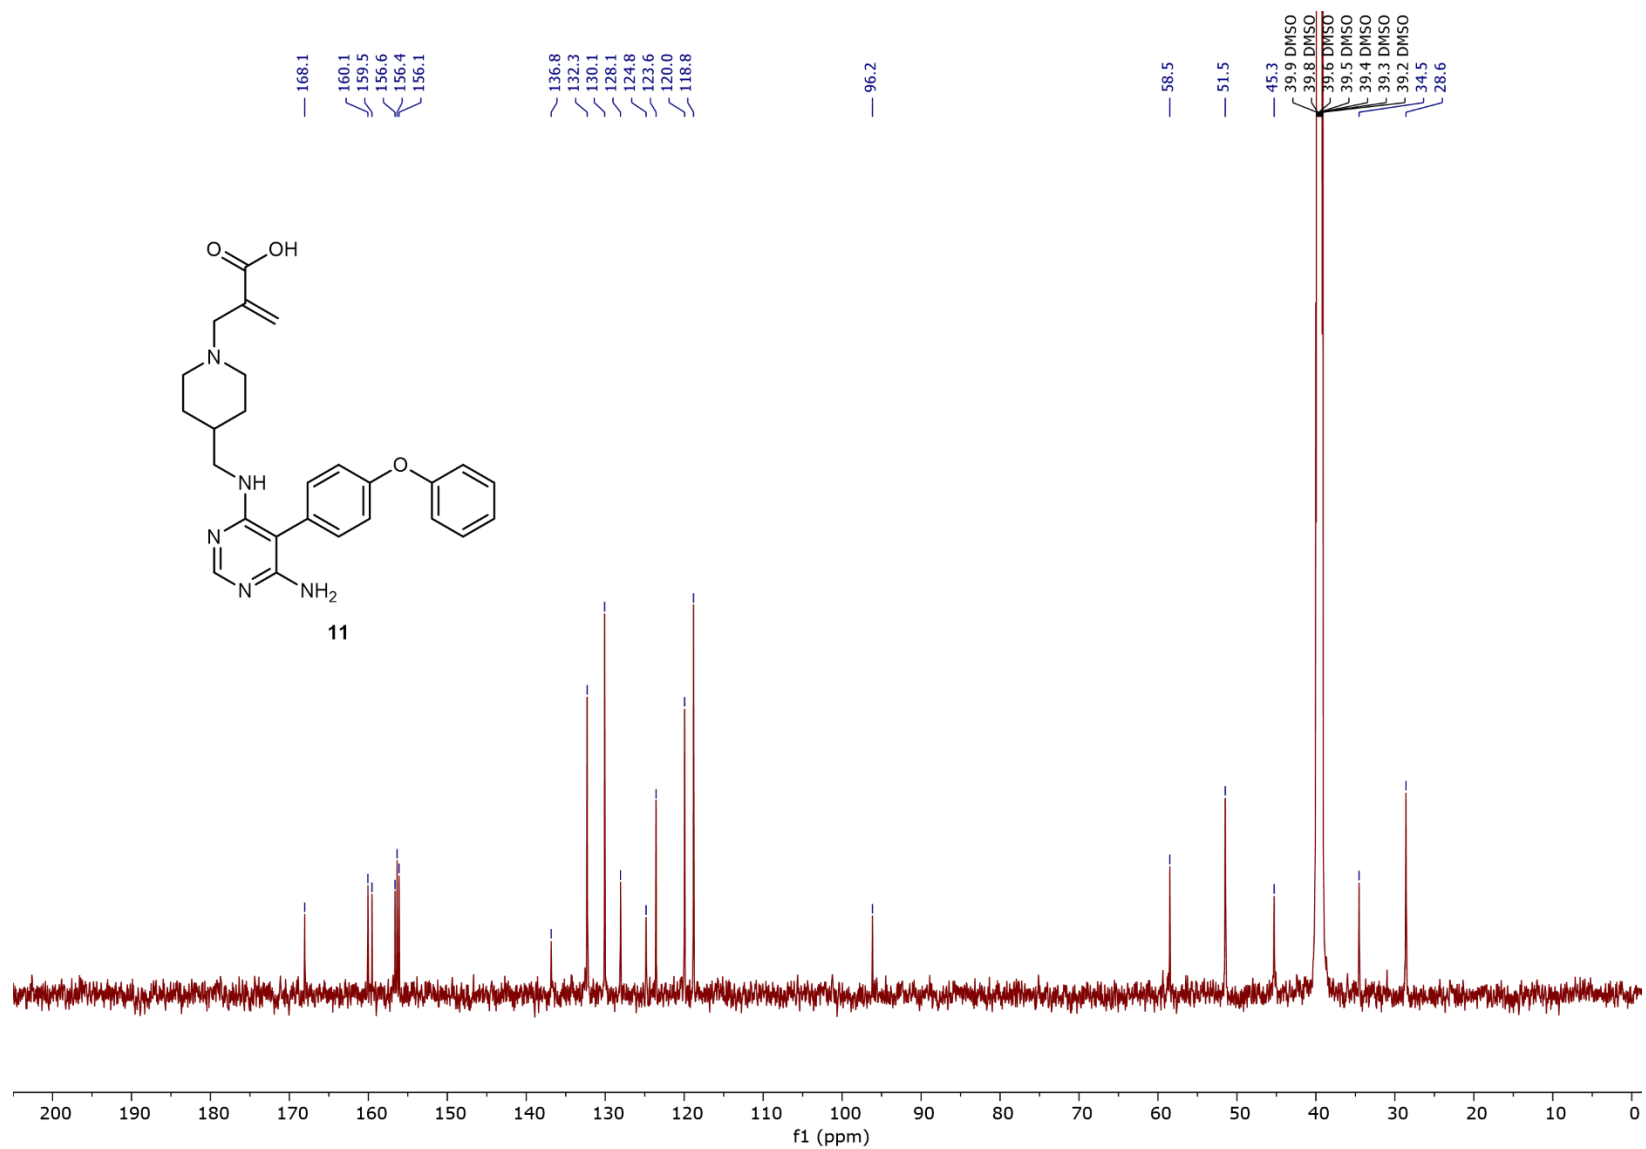

**Figure S46.** <sup>13</sup>C{<sup>1</sup>H} NMR spectrum of compound **11** (176 MHz, (CD<sub>3</sub>)<sub>2</sub>SO).

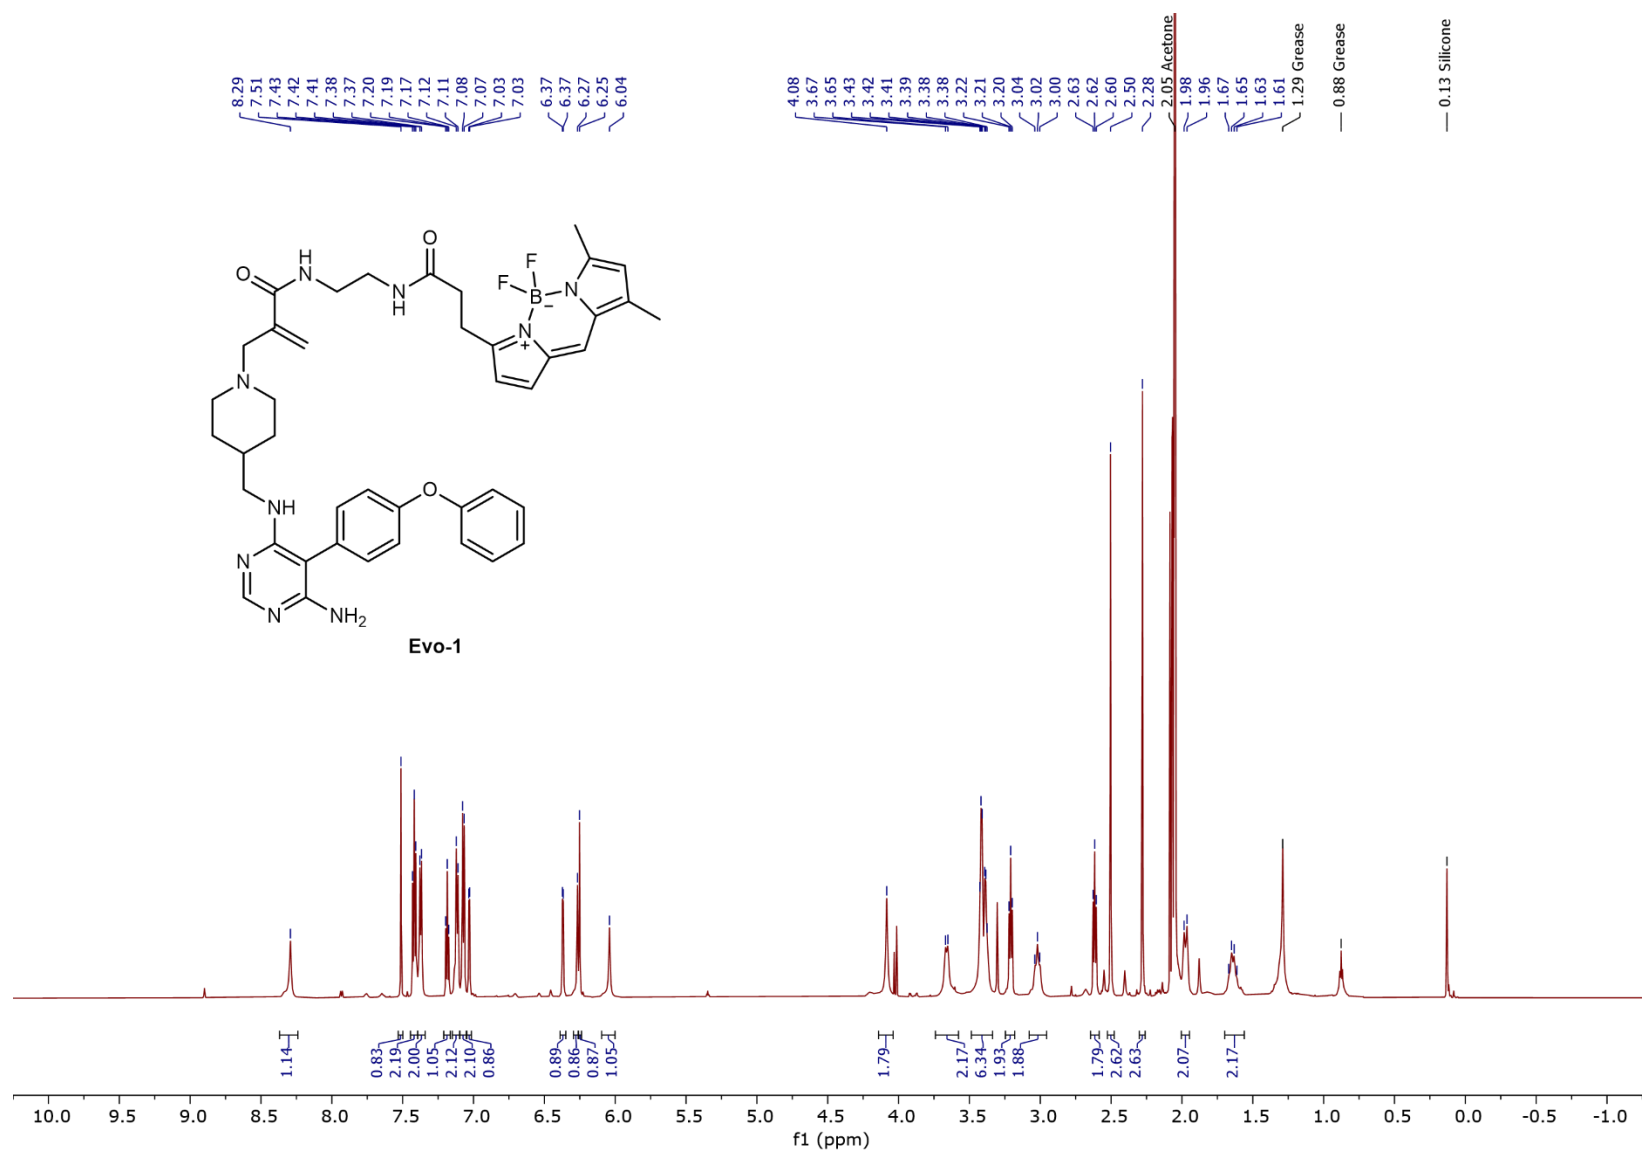

**Figure S47.** <sup>1</sup>H NMR spectrum of **Evo-1** (700MHz, (CD<sub>3</sub>)<sub>2</sub>CO).

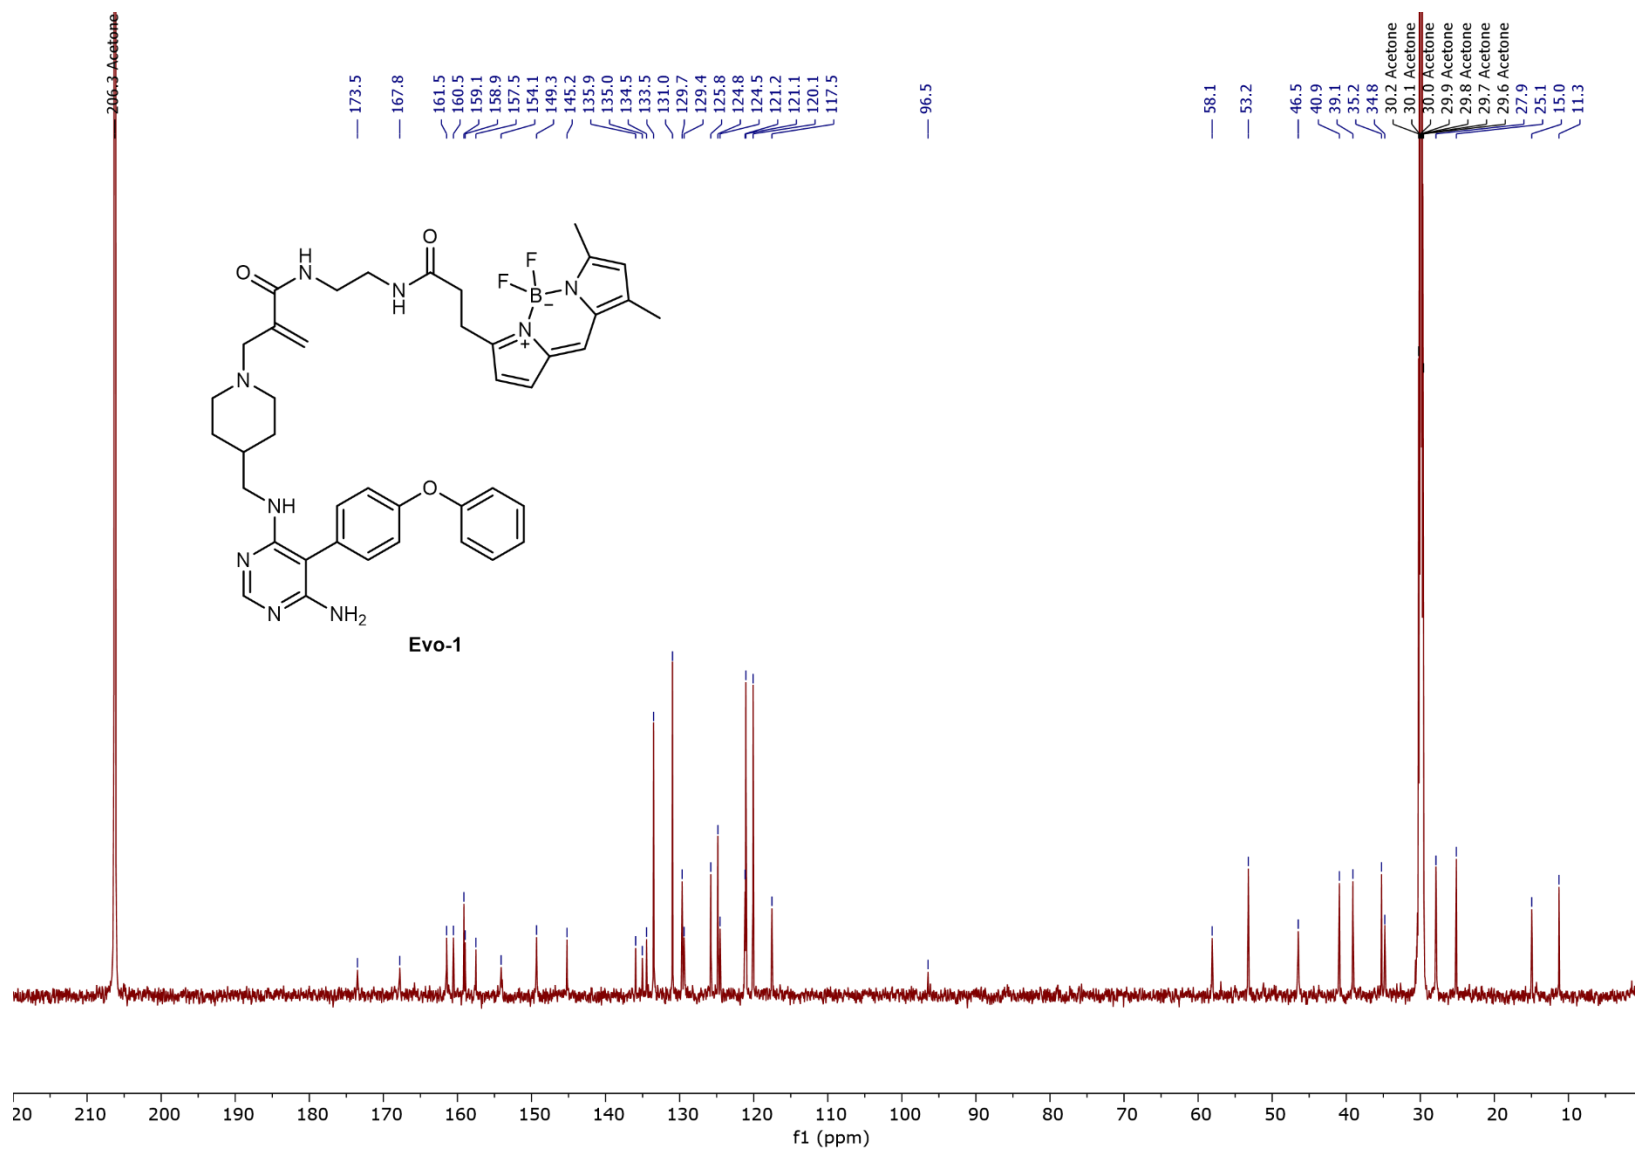

**Figure S48.**  $^{13}\text{C}\{^1\text{H}\}$  NMR spectrum of **Evo-1** (176 MHz,  $(\text{CD}_3)_2\text{CO}$ ).

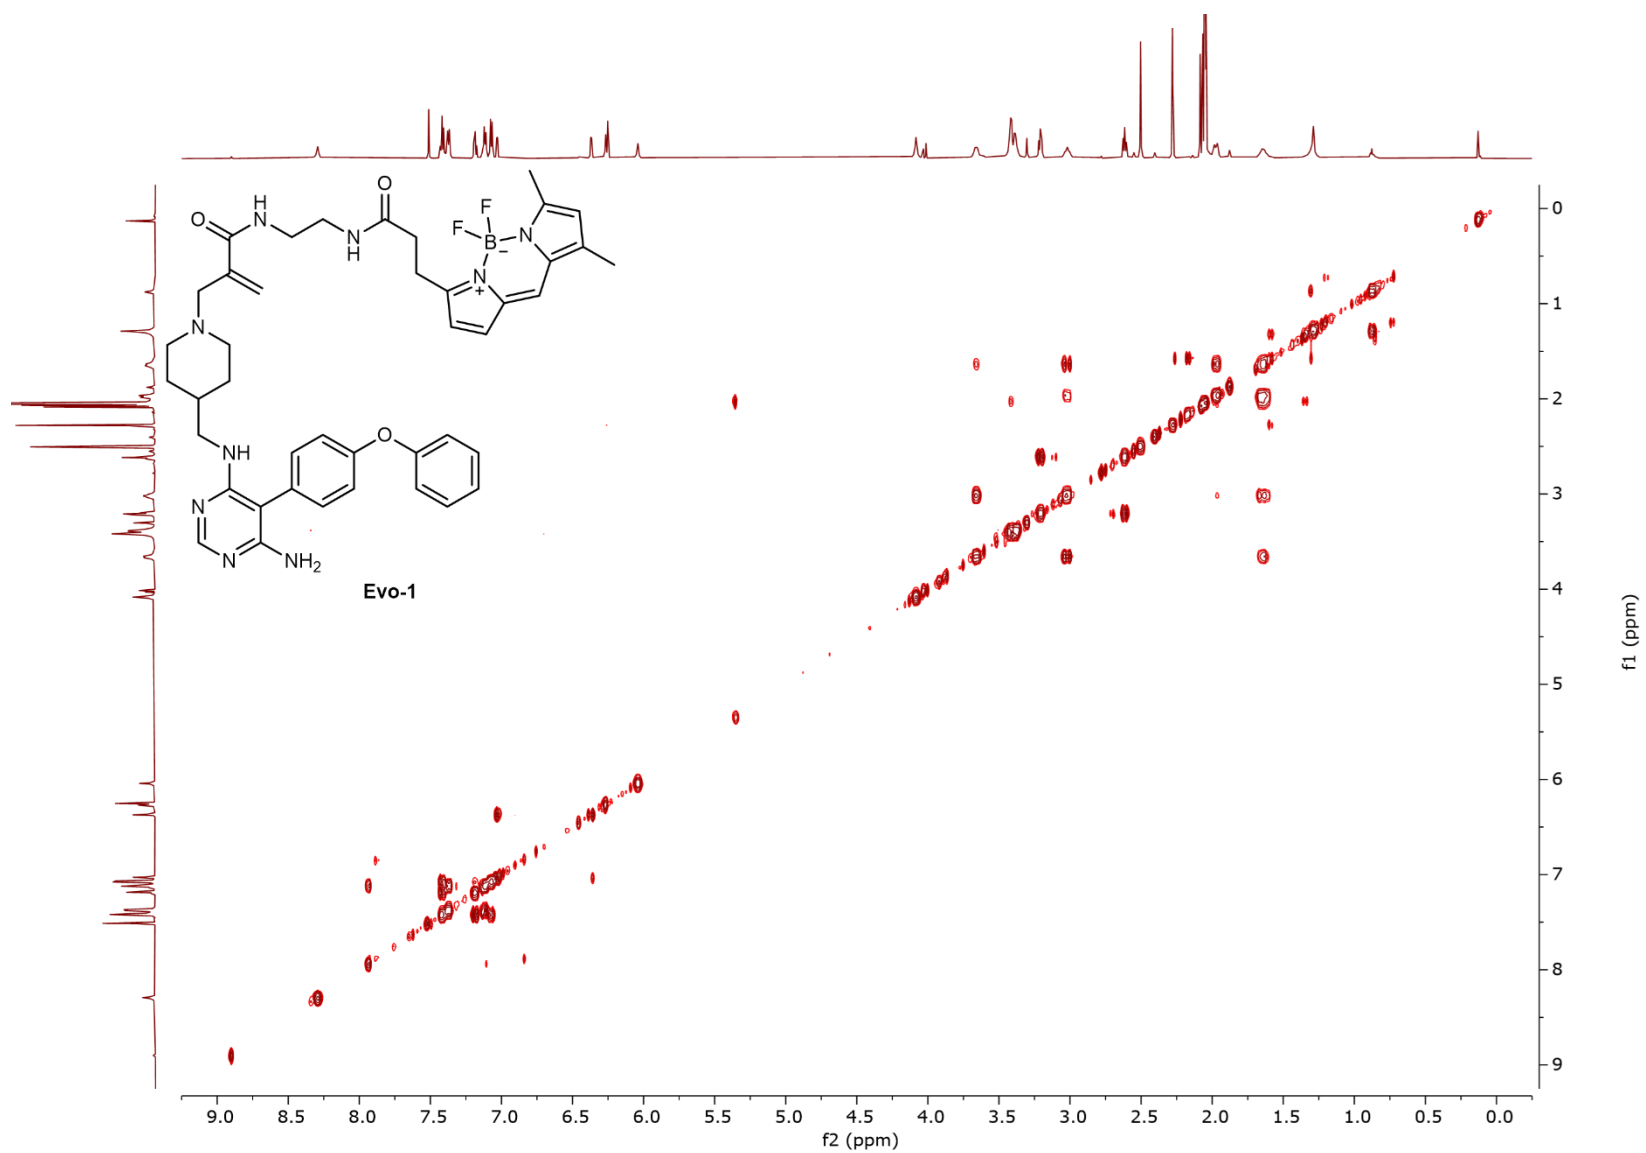

**Figure S49.**  $^1\text{H}$ - $^1\text{H}$  COSY spectrum of **Evo-1** [ $(\text{CD}_3)_2\text{CO}$ ].

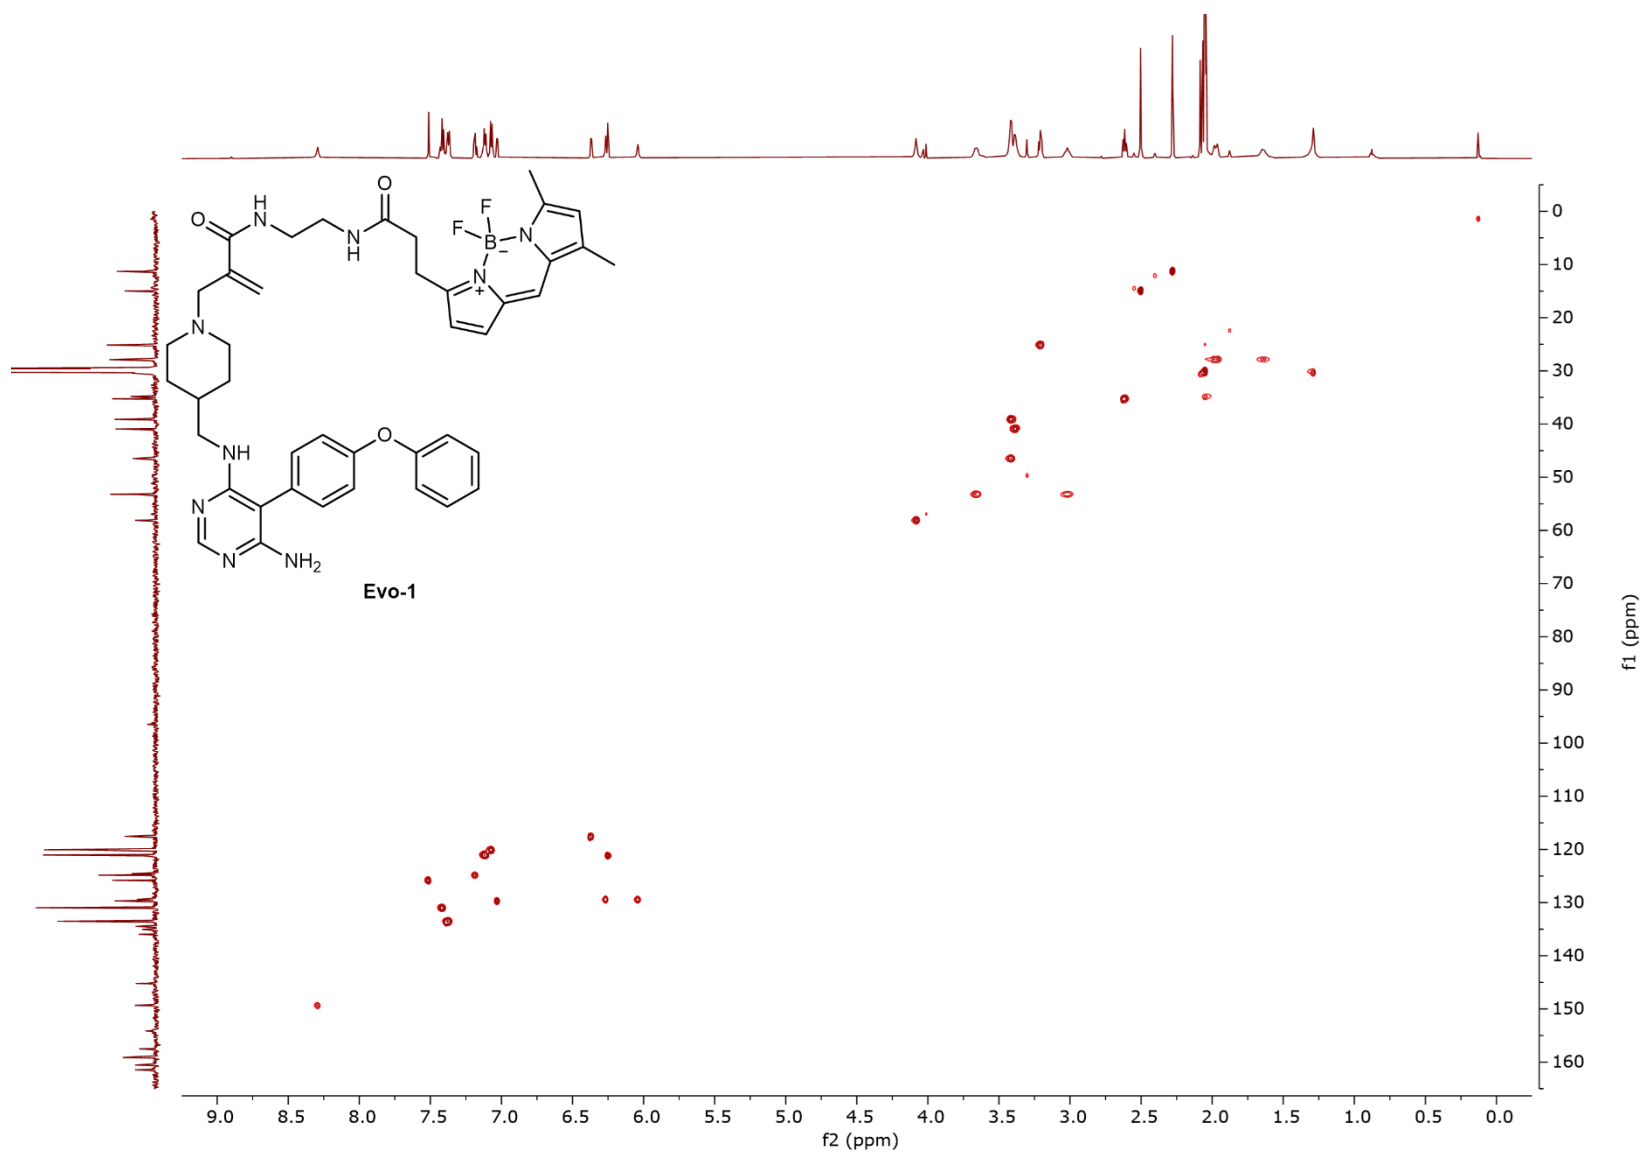

**Figure S50.**  $^1\text{H}$ - $^{13}\text{C}$  HSQC spectrum of **Evo-1** [ $(\text{CD}_3)_2\text{CO}$ ].

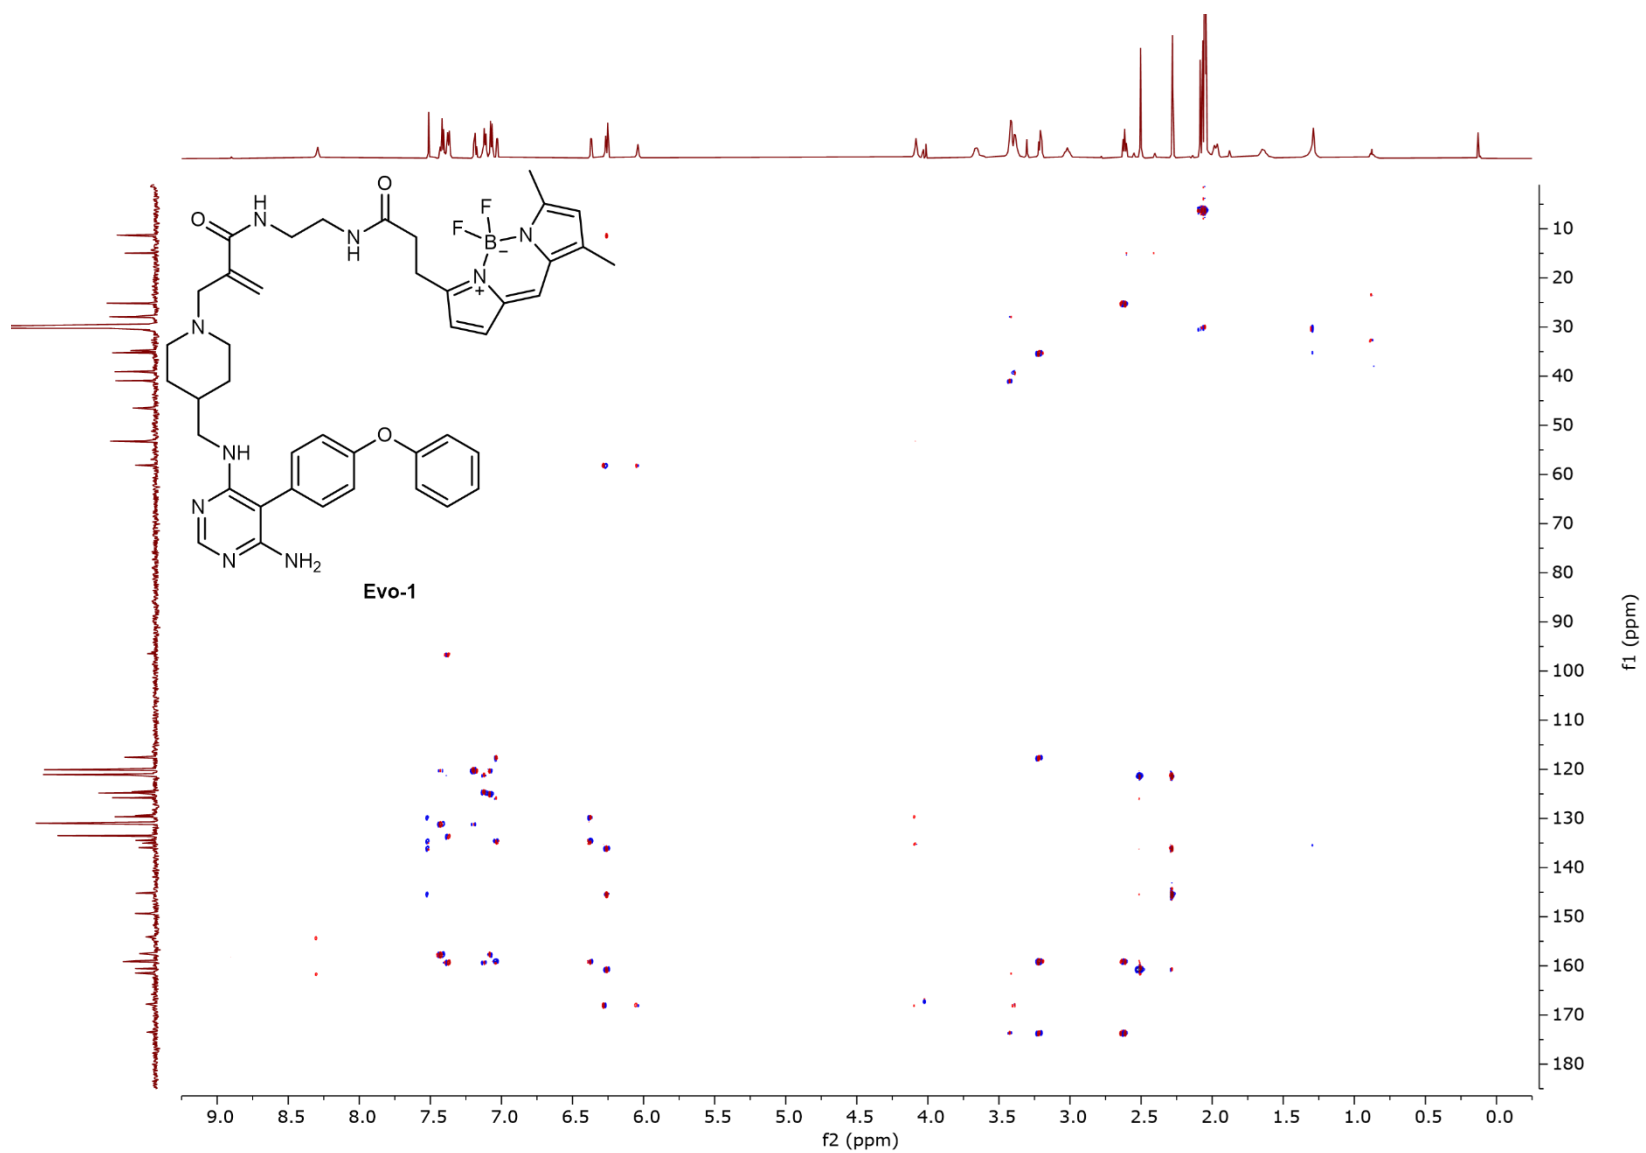

**Figure S51.**  $^1\text{H}$ - $^{13}\text{C}$  HMBC spectrum of **Evo-1** [ $(\text{CD}_3)_2\text{CO}$ ].



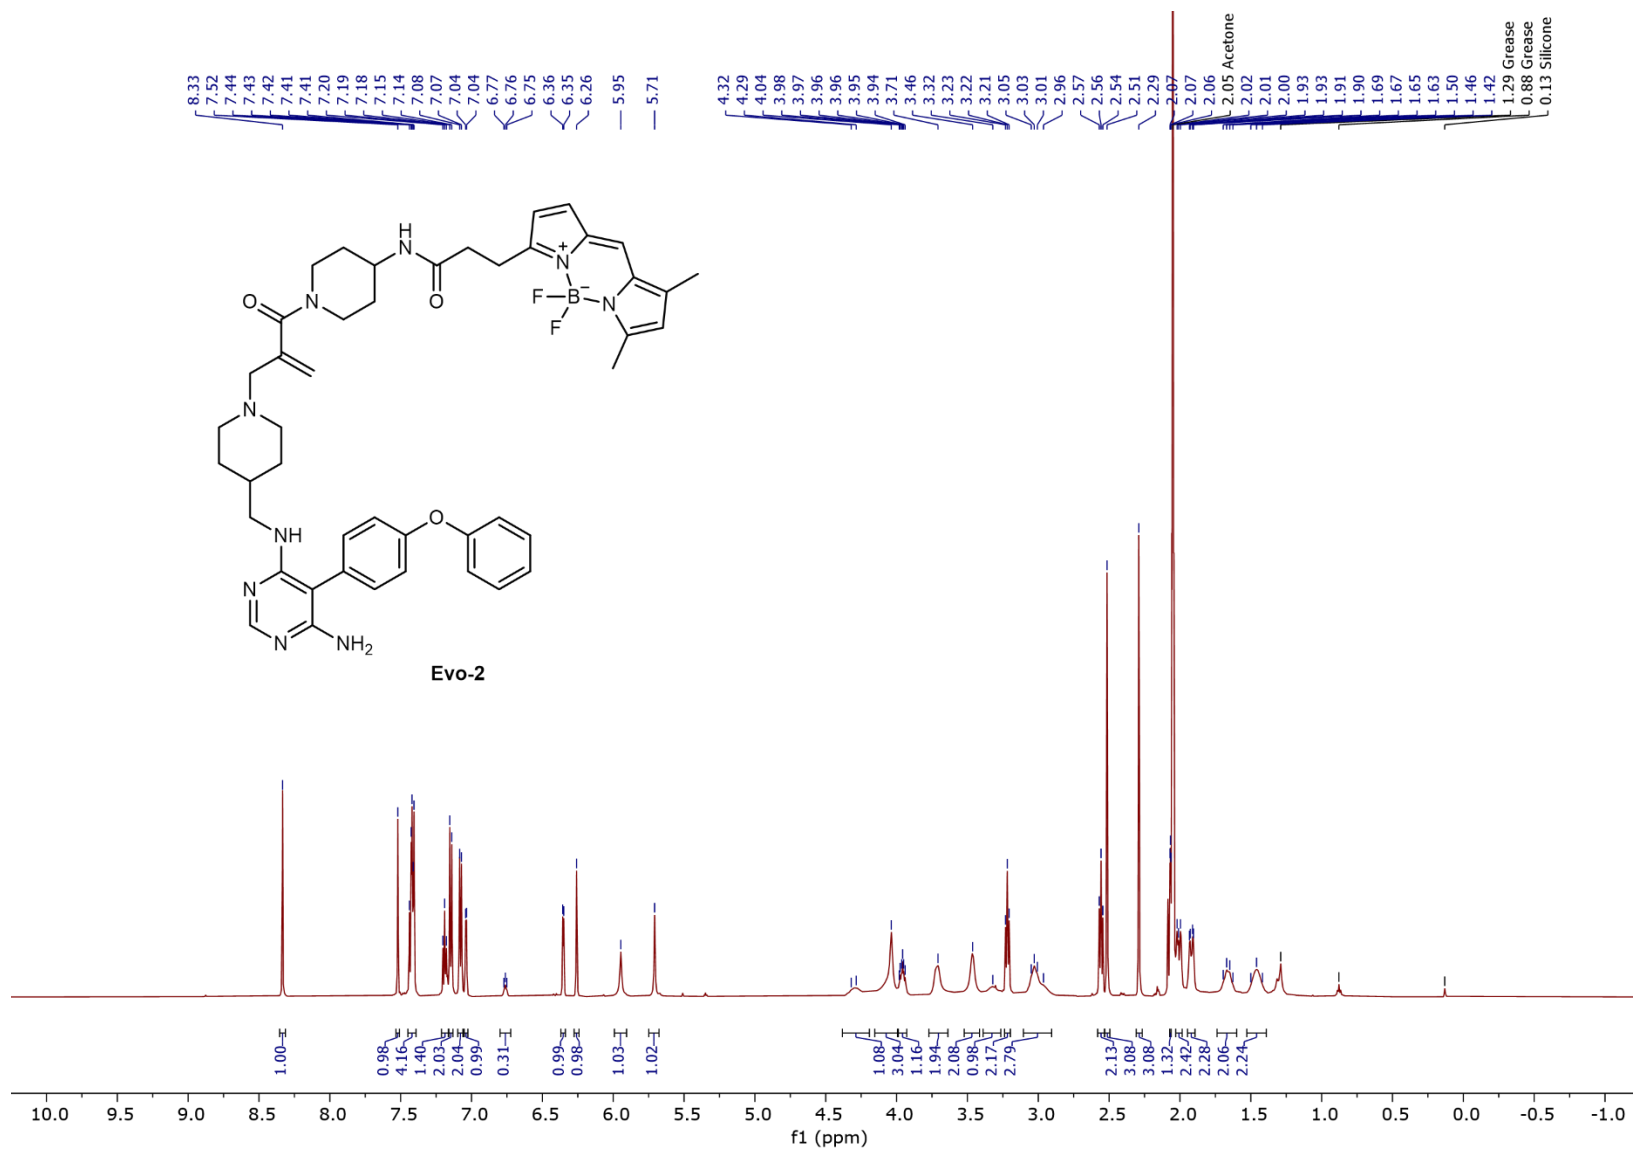

**Figure S52.**  $^1\text{H}$  NMR spectrum of **Evo-2** (600MHz,  $(\text{CD}_3)_2\text{CO}$ ).

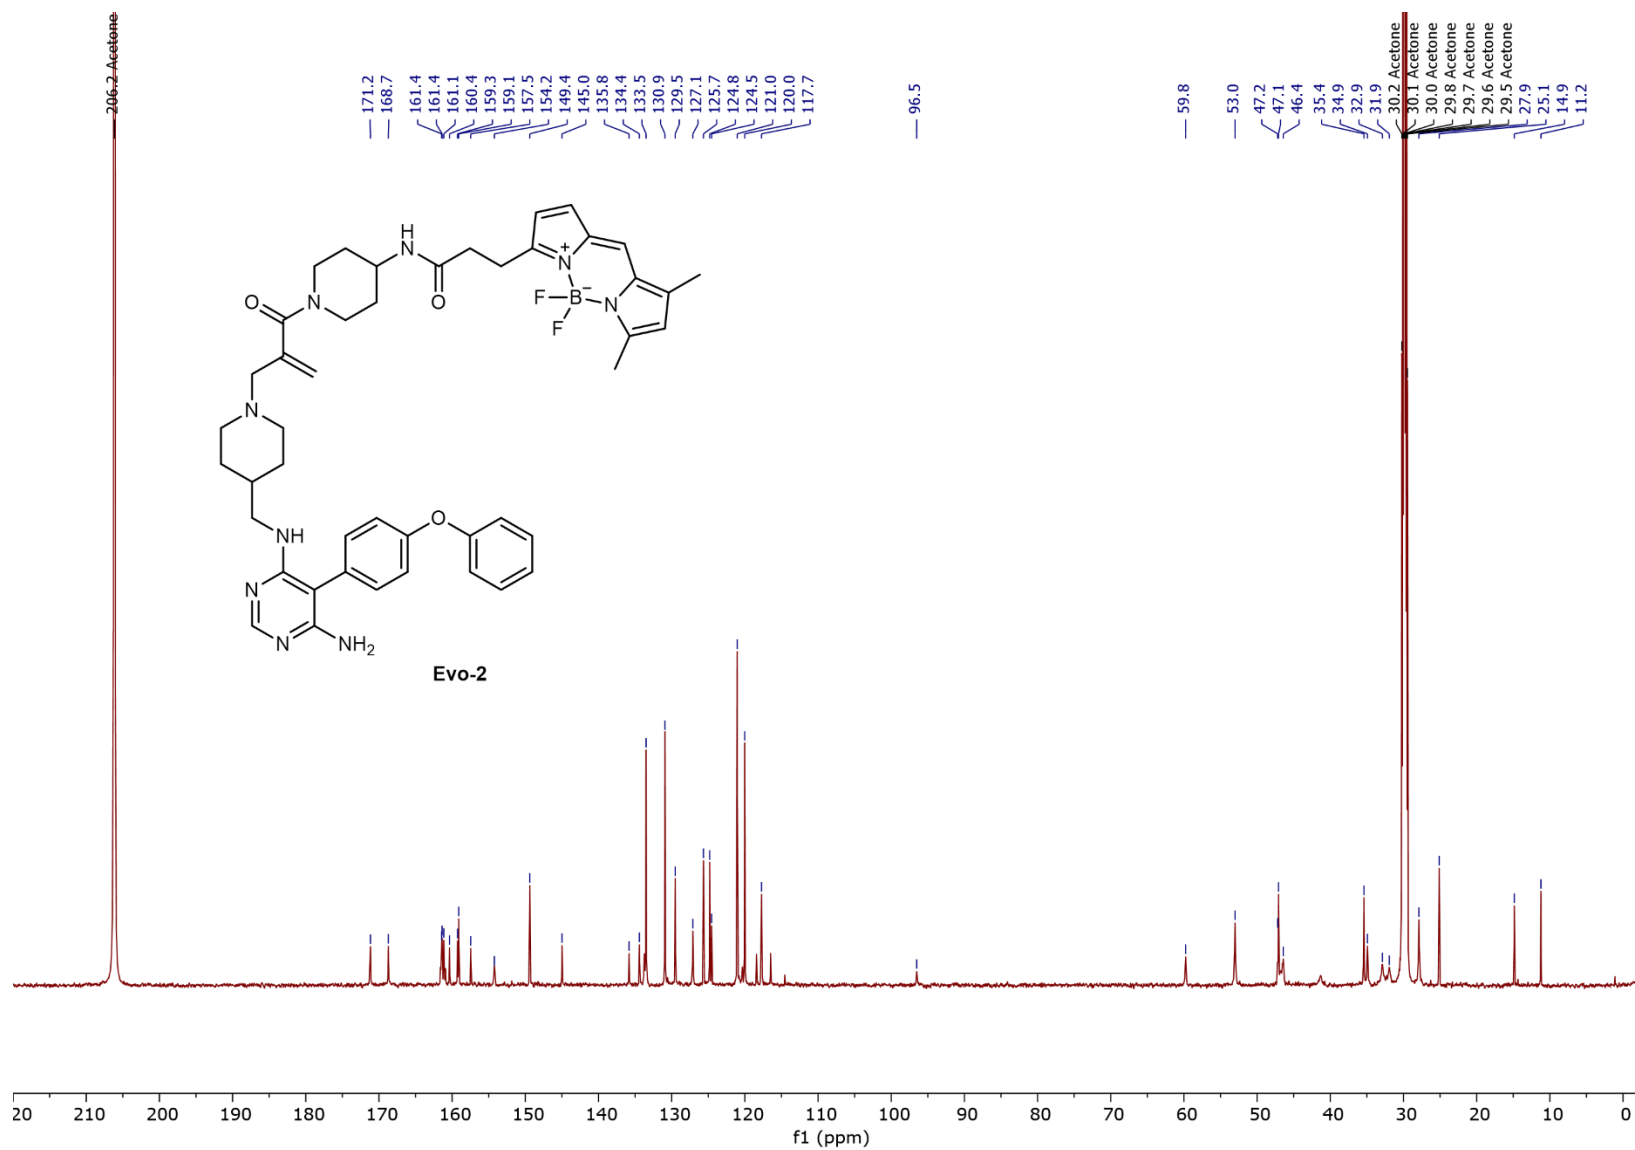

**Figure S53.**  $^{13}\text{C}\{^1\text{H}\}$  NMR spectrum of **Evo-2** (151 MHz,  $(\text{CD}_3)_2\text{CO}$ ).

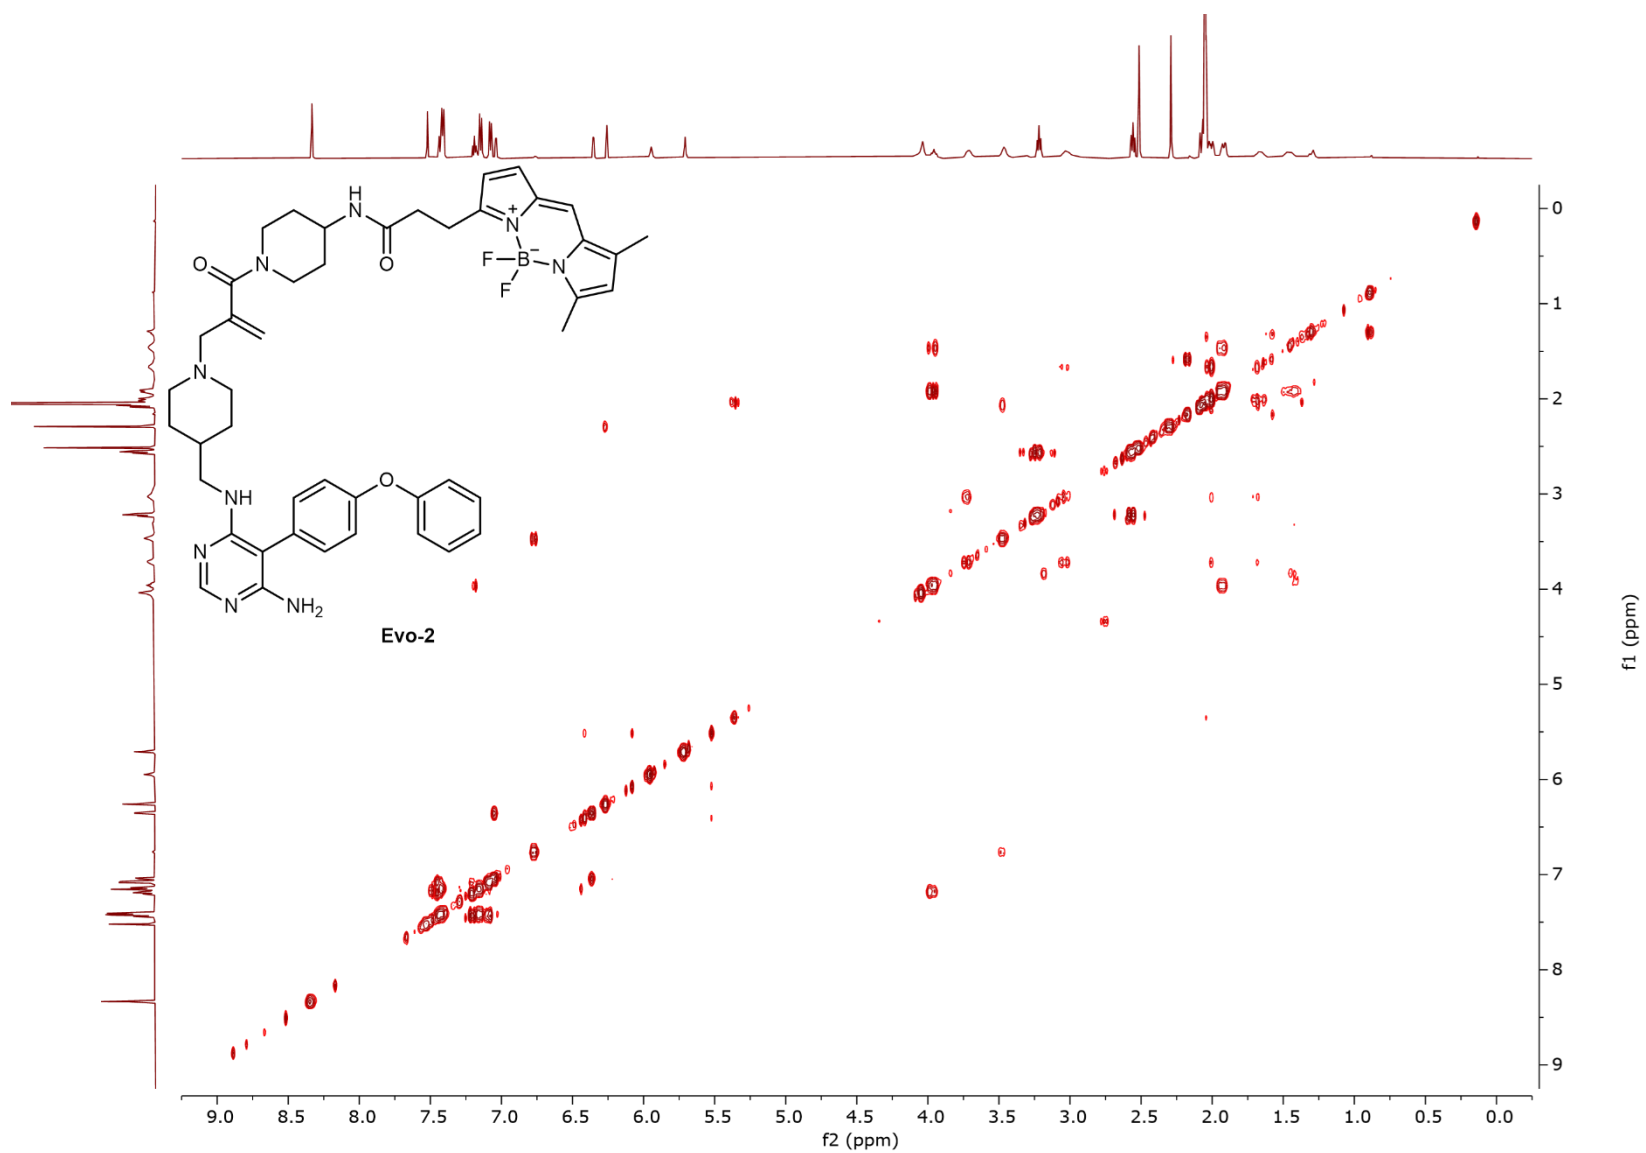

**Figure S54.**  $^1\text{H}$ - $^1\text{H}$  COSY spectrum of **Evo-2** [ $(\text{CD}_3)_2\text{CO}$ ].

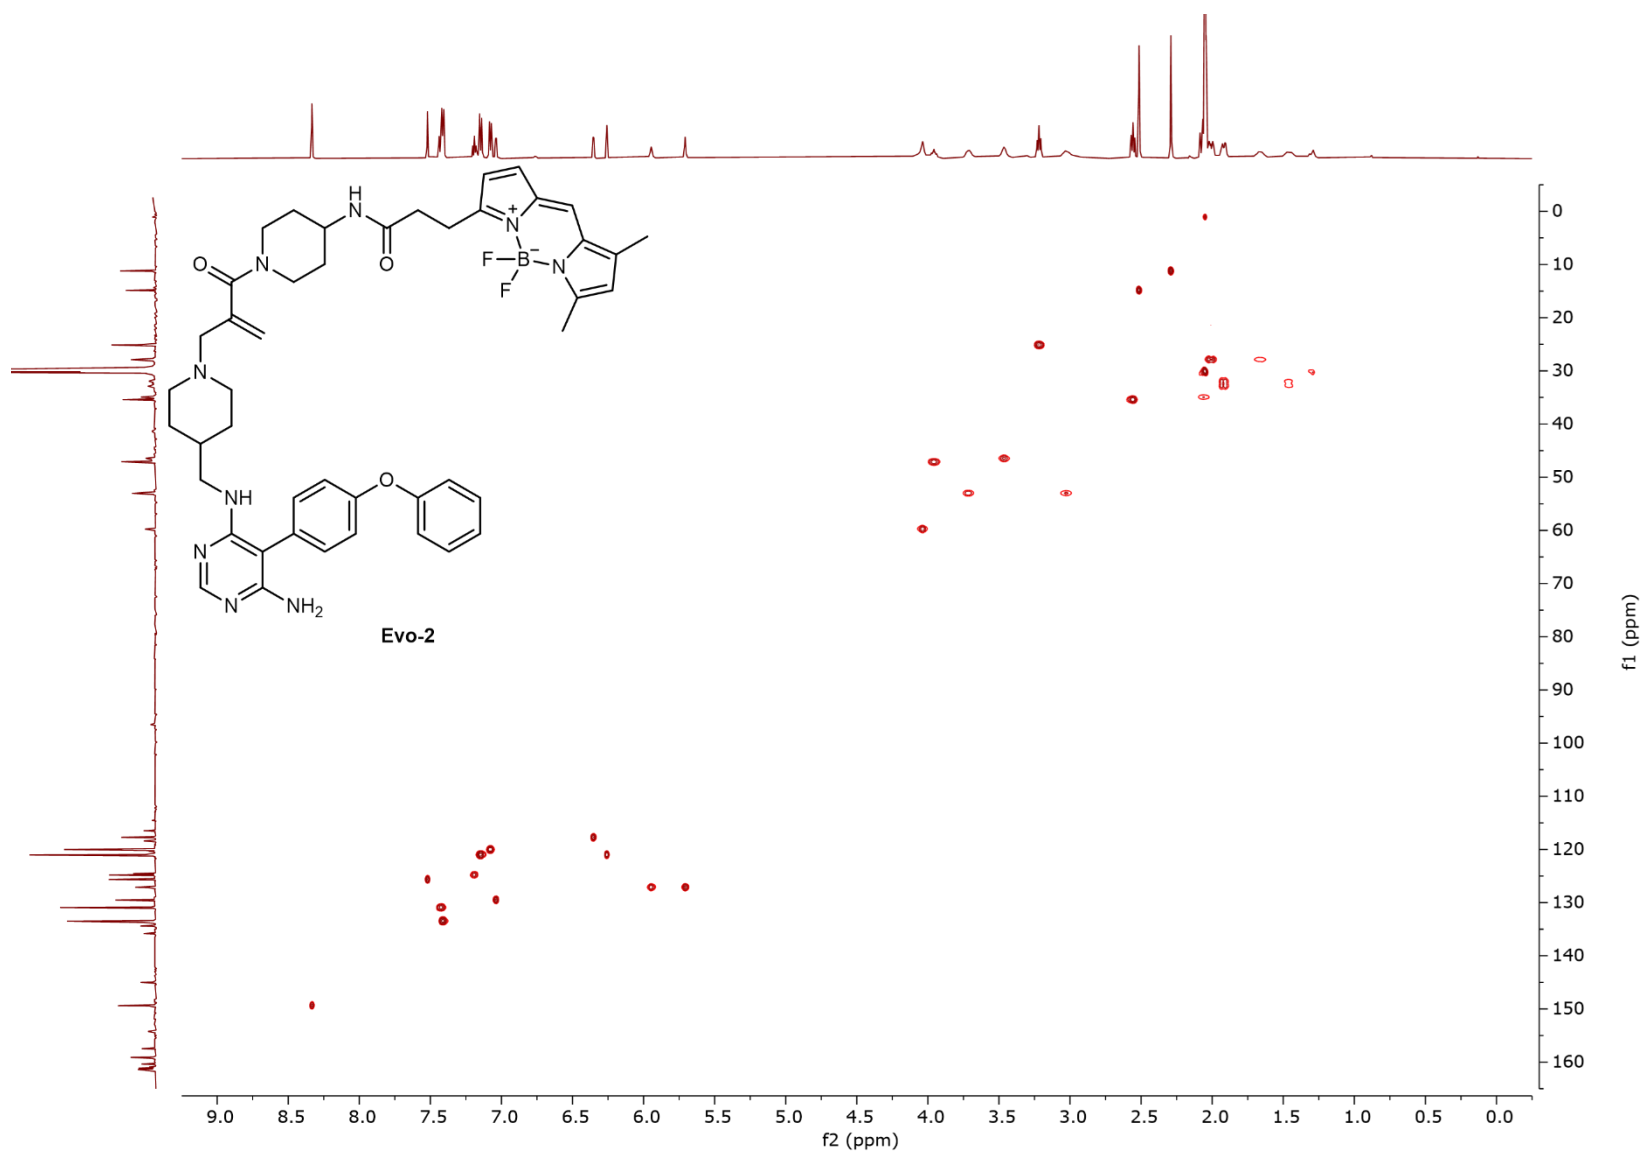

**Figure S55.**  $^1\text{H}$ - $^{13}\text{C}$  HSQC spectrum of **Evo-2** [ $(\text{CD}_3)_2\text{CO}$ ].

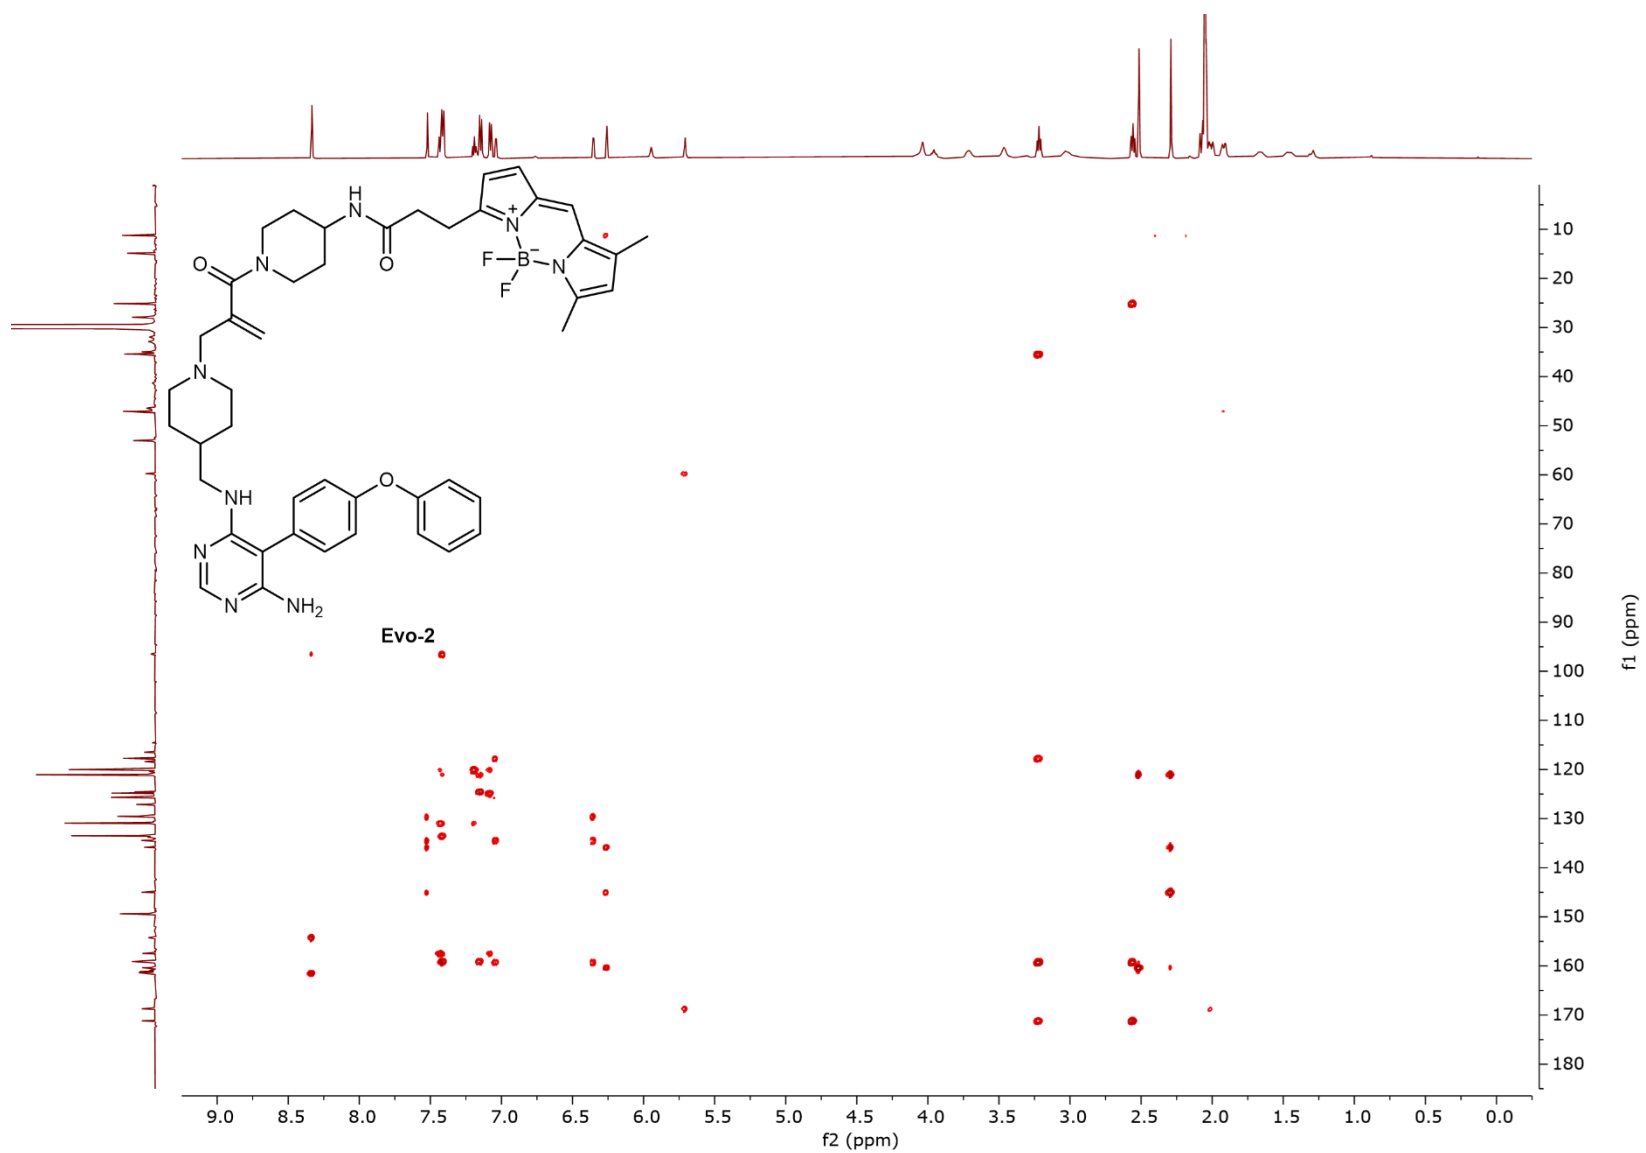

Figure S56.  $^1\text{H}$ - $^{13}\text{C}$  HMBC spectrum of **Evo-2** [ $(\text{CD}_3)_2\text{CO}$ ].

## HRMS Spectra

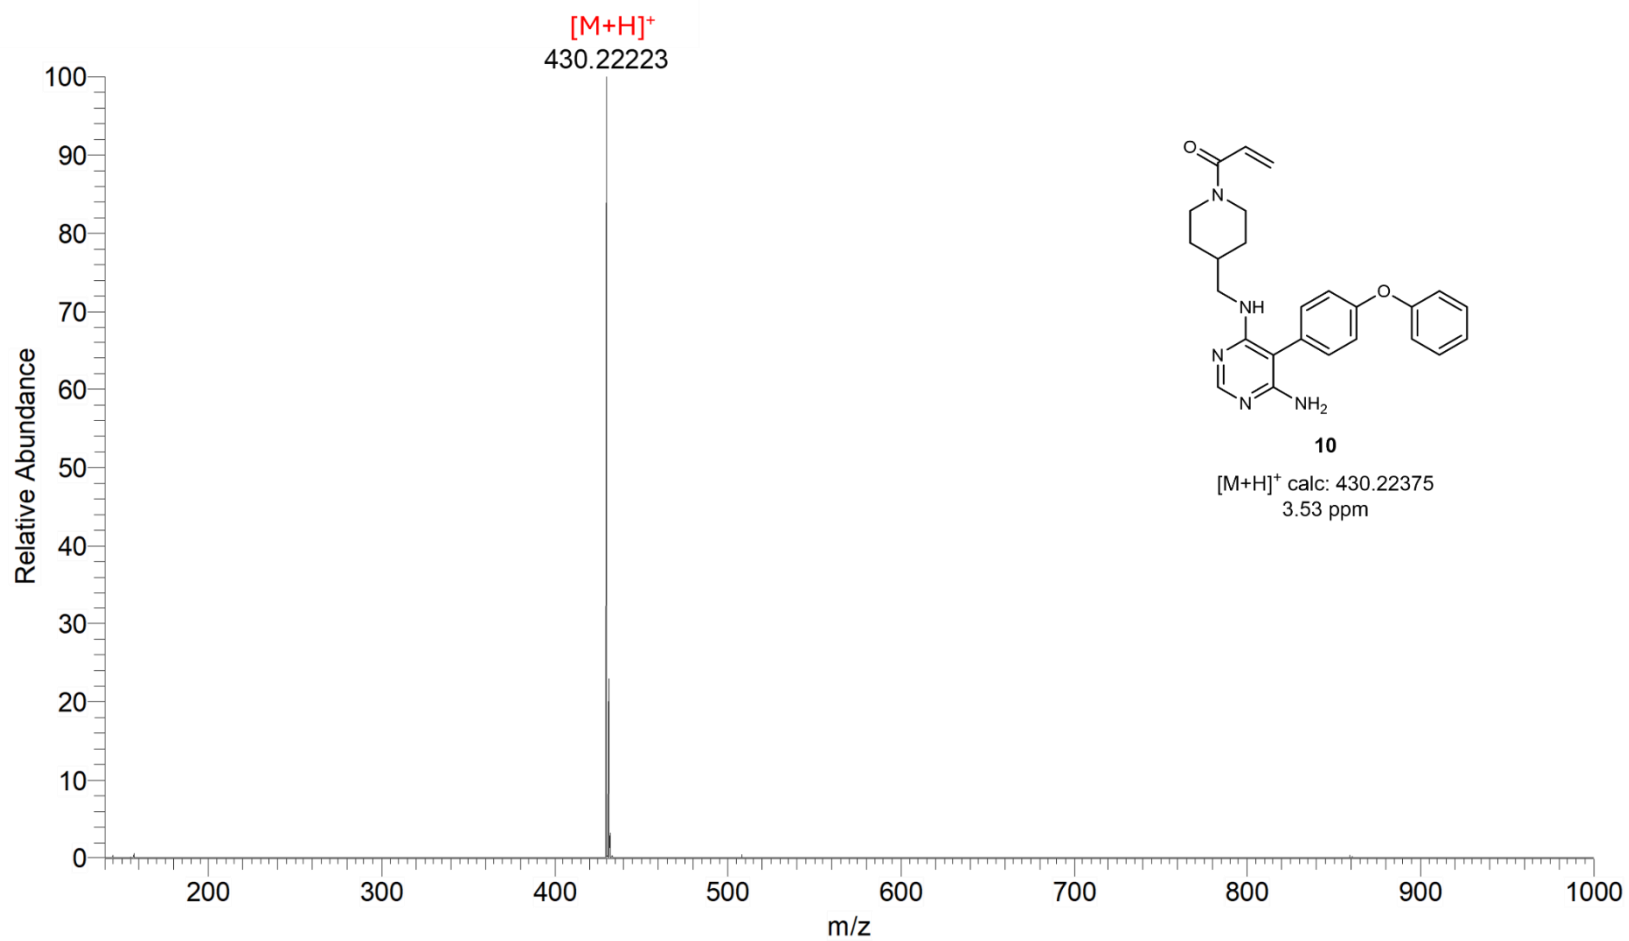

**Figure S57.** HRMS spectrum of compound **10**.

**Figure**

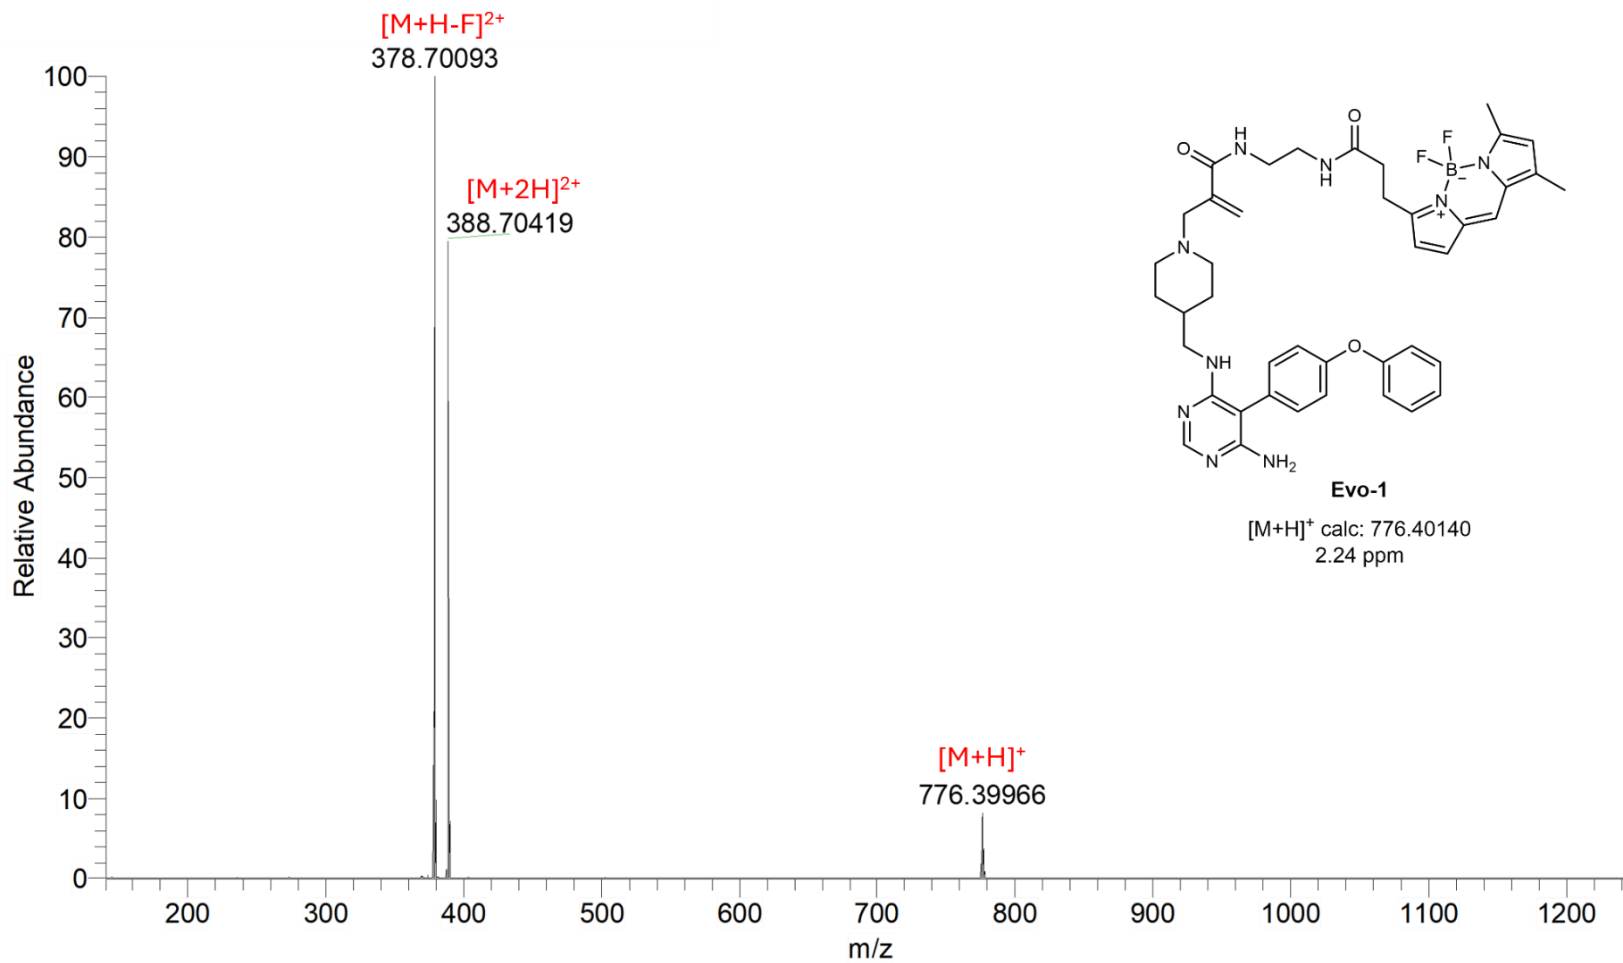

Figure S58. HRMS spectrum of Evo-1.

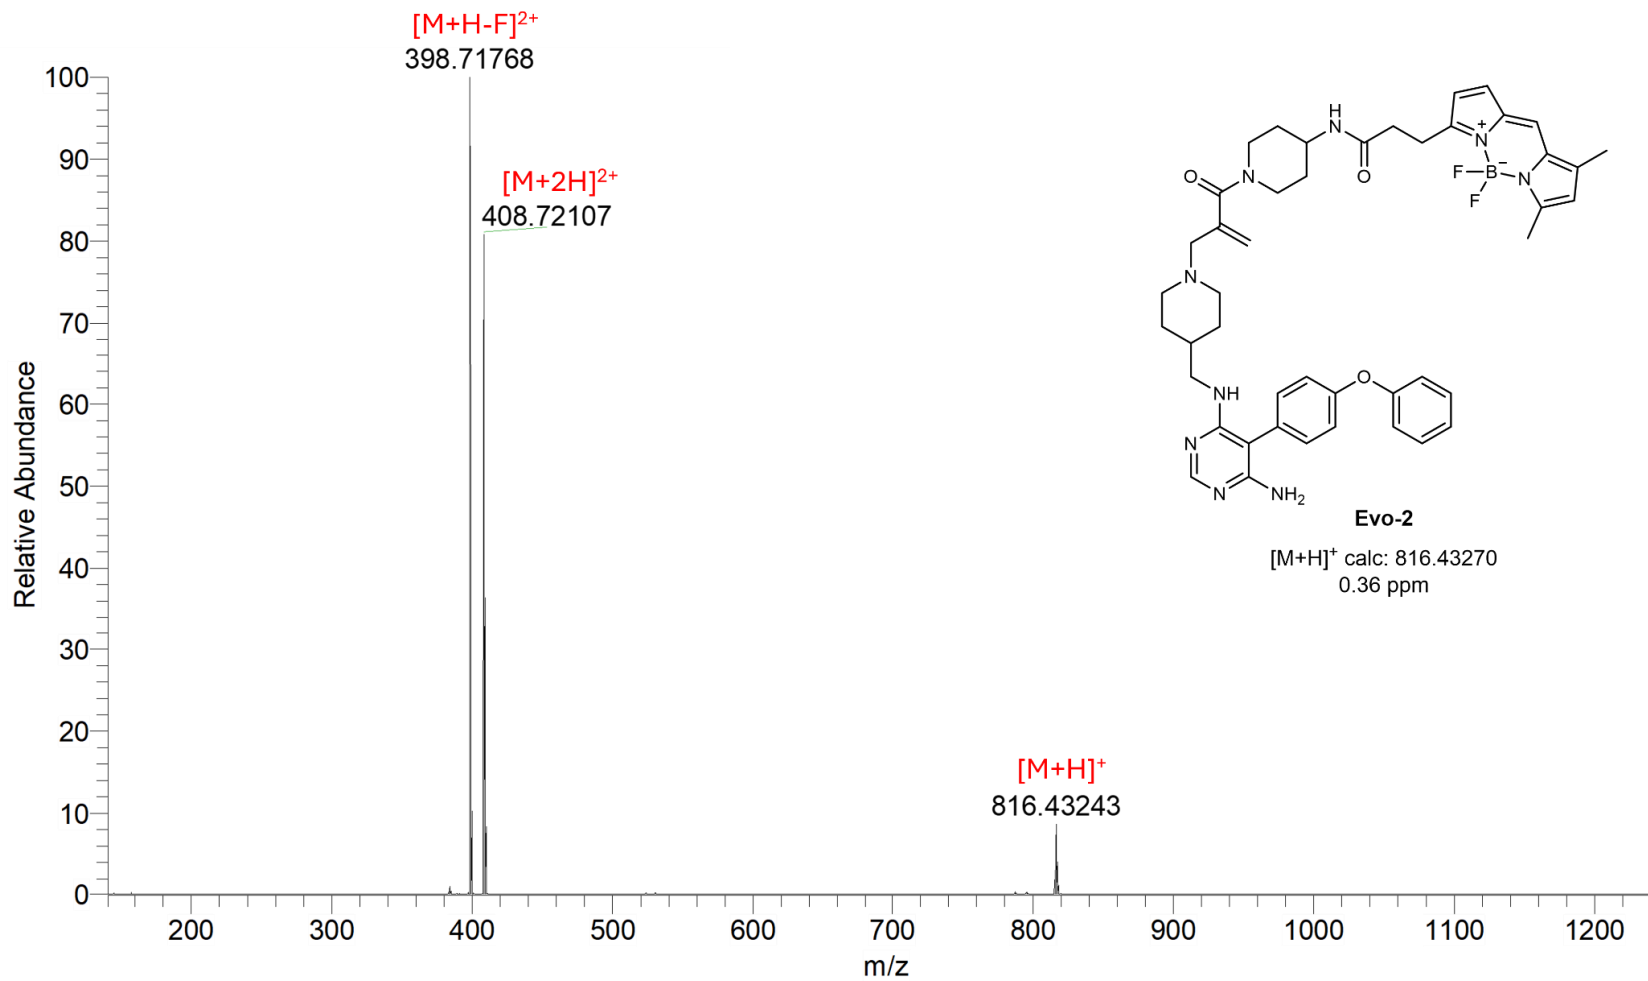

Figure S59. HRMS spectrum of **Evo-2**.



## HPLC Chromatograms

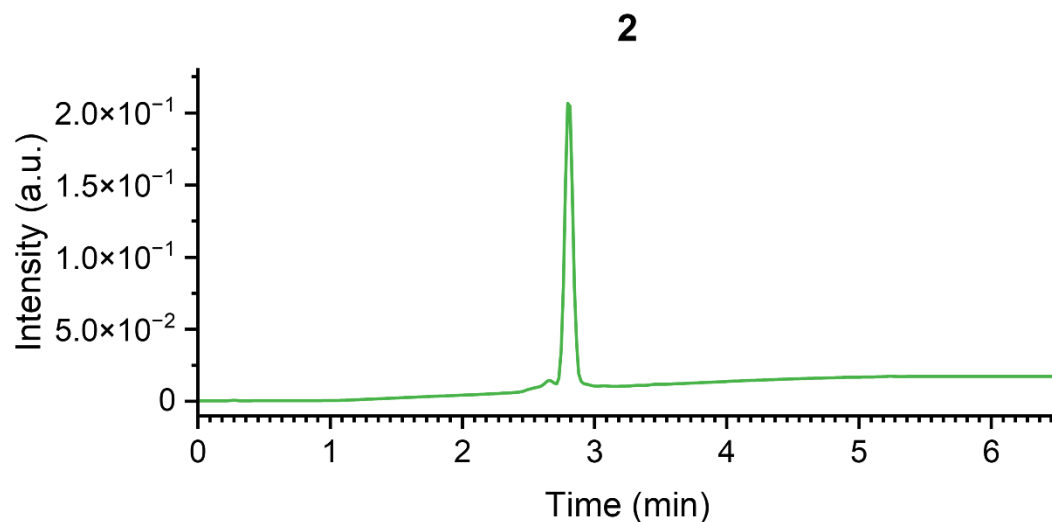

**Figure S60.** UV spectrum (sum of absorption at 254 nm and 360 nm) of the LC-MS analysis of compound **2**. a.u. = absorbance units.

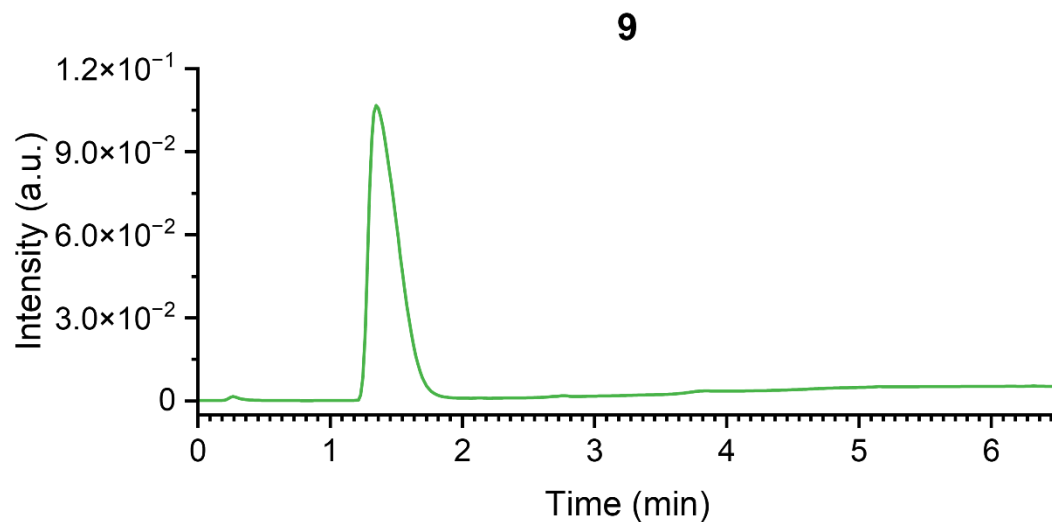

**Figure S61.** UV spectrum (sum of absorption at 230 nm and 254 nm) of the LC-MS analysis of compound **9**. a.u. = absorbance units.

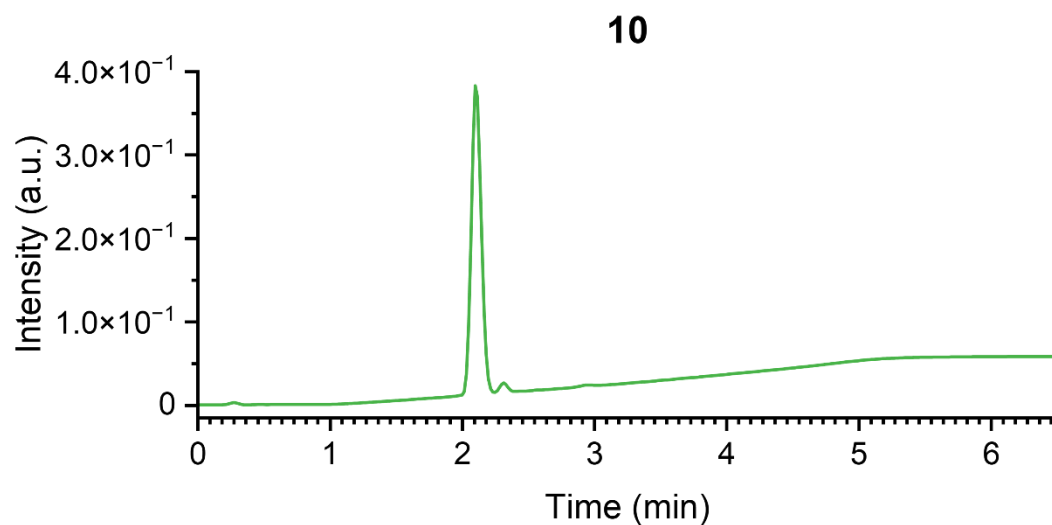

**Figure S62.** UV spectrum (sum of absorption at 230 nm and 254 nm) of the LC-MS analysis of compound **10**. a.u. = absorbance units.

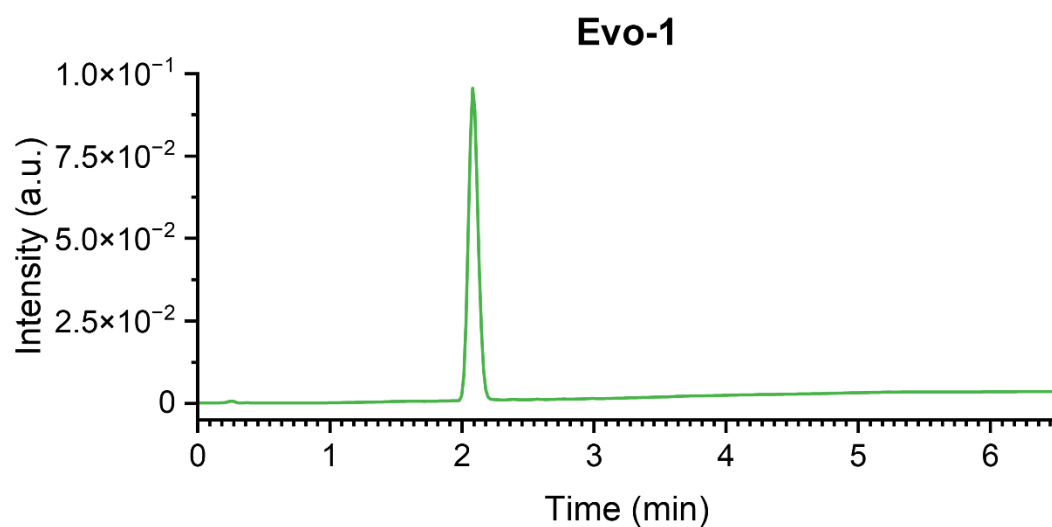

**Figure S63.** UV spectrum (sum of absorption at 254 nm and 360 nm) of the LC-MS analysis of **Evo-1**. a.u. = absorbance units.

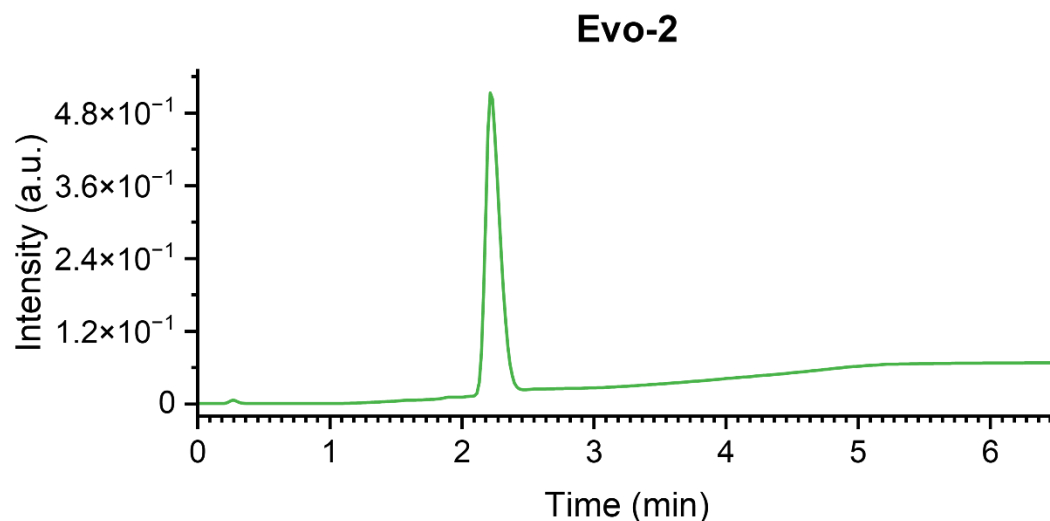

**Figure S64.** UV spectrum (sum of absorption at 230 nm and 254 nm) of the LC-MS analysis of **Evo-2**. a.u. = absorbance units.

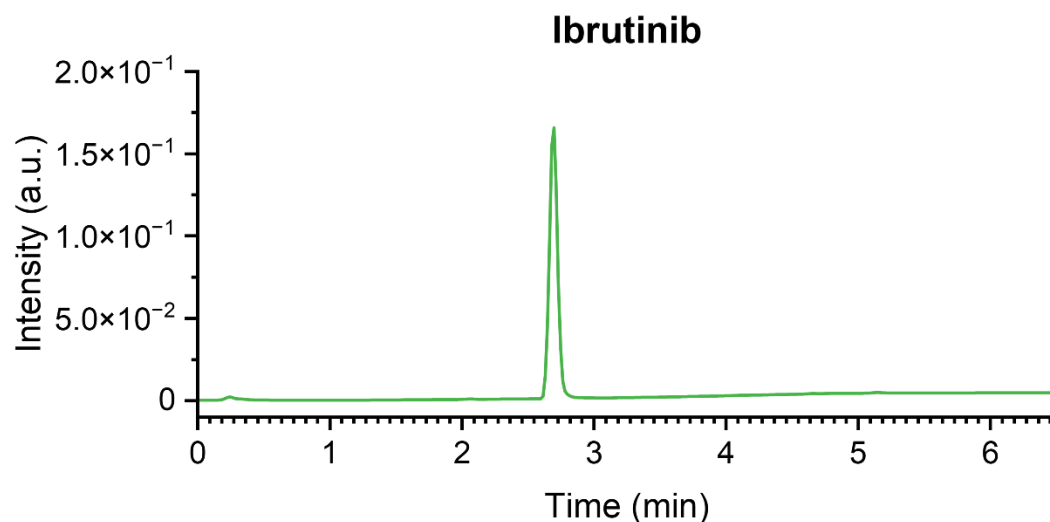

**Figure S65.** UV spectrum (sum of absorption at 230 nm and 254 nm) of the LC-MS analysis of the purchased ibrutinib. a.u. = absorbance units.

## References

- 1 S. Krajcovicova, J. Stankova, P. Dzubak, M. Hajduch, M. Soural and M. Urban, *Chemistry – A European Journal*, 2018, **24**, 4957–4966.
- 2 R. D. Caldwell, H. Qiu, B. C. Askew, A. T. Bender, N. Brugger, M. Camps, M. Dhanabal, V. Dutt, T. Eichhorn, A. S. Gardberg, A. Goutopoulos, R. Grenningloh, J. Head, B. Healey, B. L. Hodous, B. R. Huck, T. L. Johnson, C. Jones, R. C. Jones, I. Mochalkin, F. Morandi, N. Nguyen, M. Meyring, J. R. Potnick, D. C. Santos, R. Schmidt, B. Sherer, A. Shutes, K. Urbahns, A. V. Follis, A. A. Wegener, S. C. Zimmerli and L. Liu-Bujalski, *J. Med. Chem.*, 2019, **62**, 7643–7655.

- 3 R. N. Reddi, A. Rogel, E. Resnick, R. Gabizon, P. K. Prasad, N. Gurwicz, H. Barr, Z. Shulman and N. London, *J. Am. Chem. Soc.*, 2021, **143**, 20095–20108.
- 4 C. S. Hughes, S. Foehr, D. A. Garfield, E. E. Furlong, L. M. Steinmetz and J. Krijgsveld, *Molecular Systems Biology*, 2014, **10**, 757.
- 5 C. A. Schneider, W. S. Rasband and K. W. Eliceiri, *Nat Methods*, 2012, **9**, 671–675.
- 6 S. Bolte and F. P. Cordelières, *Journal of Microscopy*, 2006, **224**, 213–232.
